# Supplementary material for: Systematic review protocol for facilitators and barriers to integrating health services for traumatic brain injury and mental health or addictions
Source: PubMed Central journal article supplement — BMJ Open. 2019 Jul 23;9(7):e027534. doi: 10.1136/bmjopen-2018-027534 (PMC6661659; doi:10.1136/bmjopen-2018-027534), 2019-07-23
Supplement: bmjopen-2018-027534.draft_revisions.pdf [file bmjopen-2018-027534.draft_revisions.pdf]

# BMJ Open

BMJ Open is committed to open peer review. As part of this commitment we make the peer review history of every article we publish publicly available.

When an article is published we post the peer reviewers' comments and the authors' responses online. We also post the versions of the paper that were used during peer review. These are the versions that the peer review comments apply to.

The versions of the paper that follow are the versions that were submitted during the peer review process. They are not the versions of record or the final published versions. They should not be cited or distributed as the published version of this manuscript.

BMJ Open is an open access journal and the full, final, typeset and author-corrected version of record of the manuscript is available on our site with no access controls, subscription charges or pay-per-view fees (<http://bmjopen.bmj.com>).

If you have any questions on BMJ Open's open peer review process please email [info.bmjopen@bmj.com](mailto:info.bmjopen@bmj.com)

# BMJ Open

## A systematic review protocol for facilitators and barriers to integrating health services for traumatic brain injury and mental health or addictions

|                               |                                                                                                                                                                                                                       |
|-------------------------------|-----------------------------------------------------------------------------------------------------------------------------------------------------------------------------------------------------------------------|
| Journal:                      | <i>BMJ Open</i>                                                                                                                                                                                                       |
| Manuscript ID                 | bmjopen-2018-027534                                                                                                                                                                                                   |
| Article Type:                 | Protocol                                                                                                                                                                                                              |
| Date Submitted by the Author: | 26-Oct-2018                                                                                                                                                                                                           |
| Complete List of Authors:     | Chan , Vincy ; Toronto Rehabilitation Institute , Research Tocalino, Danielle; University of Toronto, Rehabilitation Science Institute<br>Colantonio, Angela; University of Toronto, Rehabilitation Science Institute |
| Keywords:                     | Neurological injury < NEUROLOGY, MENTAL HEALTH, Organisation of health services < HEALTH SERVICES ADMINISTRATION & MANAGEMENT, Integration of health services, Traumatic brain injury, Addictions                     |
|                               |                                                                                                                                                                                                                       |

SCHOLARONE™  
Manuscripts

**A systematic review protocol for facilitators and barriers to integrating health services for traumatic brain injury and mental health or addictions**

Vincy Chan<sup>1</sup>, Danielle Toccalino<sup>2</sup>, Angela Colantonio<sup>1,2,3</sup>

Dr. Vincy Chan, PhD

[vincy.chan@uhn.ca](mailto:vincy.chan@uhn.ca)

Toronto Rehabilitation Institute-University Health Network, 550 University Avenue, Toronto, ON, M5G 2A2

Ms. Danielle Toccalino, MSc

[danielle.toccalino@mail.utoronto.ca](mailto:danielle.toccalino@mail.utoronto.ca)

University of Toronto, 500 University Avenue, Toronto, ON, M5G 1V7

Dr. Angela Colantonio, PhD, O.T. Reg., (Ont.), FCAHS, FACRM

[angela.colantonio@utoronto.ca](mailto:angela.colantonio@utoronto.ca)

Toronto Rehabilitation Institute-University Health Network

University of Toronto

Institute for Clinical Evaluative Sciences, 2075 Bayview Avenue, Toronto, ON, M4N 3M5

Corresponding Author:

Dr. Vincy Chan

Rehabilitation Science Institute

160-500 University Avenue

Toronto, Ontario

M5G 1V7

## Abstract

### Introduction

In the most populous province of Canada, one in five adults and one in six students report a lifetime history of traumatic brain injury (TBI). These individuals were also more likely to report elevated psychological distress and use illicit substances compared to those without TBI. The need for integrated health services has been recognized globally, yet efforts to develop more comprehensive and effective care for TBI and mental health and/or addictions (MHA) continue to be challenged by the siloing of the two systems. This protocol is for a systematic review that describes the current types of integrated care for TBI and MHA, and identifies the barriers and facilitators to integrating health care for these populations.

### Methods and Analyses

This review will systematically search MEDLINE, EMBASE, PsycINFO, CINAHL, Cochrane Central Register of Controlled Trials, Sociological Abstracts, and Dissertations and Theses Global. References of eligible articles will also be searched for additional relevant studies. The search strategy will include the use of text words and subject headings relevant to the concepts 'TBI', 'substance abuse, gambling, or mental health', 'integrated healthcare', 'barriers and facilitators', and 'healthcare access'. Two reviewers will independently screen all articles based on pre-determined inclusion and exclusion criteria, and perform quality assessment on eligible studies. A narrative synthesis will be conducted using the data abstracted by the two reviewers.

### Ethics and dissemination

Findings from the systematic review will be published in peer-reviewed journals, presented at scientific meetings, and summarized for key stakeholders in the field of TBI and/or MHA. This protocol will form a systematic review that holds the potential to impact policy and planning to develop integrated person-centred care for TBI and MHA, and addresses a recognized gap in TBI care.

### Registration

CRD42018108343

## Article Summary

### *Strengths and Limitations of this Study*

- Findings from this review hold the potential to impact policy and planning for integrating care for traumatic brain injury (TBI) and mental health and/or addictions (MHA), addressing a recognized gap in TBI care
- A limitation of this study is the exclusion of non-English language studies, thereby omitting evidence on integrating TBI and MHA in jurisdictions where findings are not published in English
- A strength of this study is that, recognizing not all studies will explicitly describe a policy, intervention, service delivery, or program as integrating TBI and MHA care, the primary search strategy (TBI, MHA, and integrated care) will be supplemented with an additional search that aims to capture articles describing barriers and facilitators to healthcare for TBI and MHA (TBI, MHA, barriers and facilitators, and healthcare access) to maximize the return of relevant articles

## A systematic review protocol for facilitators and barriers to integrating health services for traumatic brain injury and mental health or addictions

Traumatic brain injury (TBI) has been defined as “an alteration in brain function, or other evidence of brain pathology, caused by an external force”.<sup>1</sup> It is more common than breast cancer, HIV/AIDS, spinal cord injury, and multiple sclerosis combined,<sup>2-5</sup> and the indirect economic costs due to a TBI is projected to be \$8.2 billion by 2031 in Canada alone. This exceeds costs of other common neurological conditions, including epilepsy, multiple sclerosis, and dementias including Alzheimer’s.<sup>6</sup> In Ontario, Canada, home to 39% of Canadians,<sup>7</sup> one in six adults<sup>8</sup> and one in five students<sup>9</sup> report a lifetime history of TBI. These individuals were also at least 52% more likely to have elevated psychological distress,<sup>10</sup> 100% more likely to use cannabis,<sup>11</sup> 93% more likely to experience suicidal ideation,<sup>10</sup> and 239% more likely to have attempted suicide<sup>10</sup> compared to those without a history of TBI. Literature exploring the relationship between TBI and mental health and/or addictions (MHA) has found that MHA is prevalent after TBI across the lifespan, particularly diagnoses of schizophrenia, depression, anxiety, substance use disorder, post-traumatic stress disorder, obsessive-compulsive disorder (OCD), and attention deficit hyperactivity disorder (ADHD).<sup>12-22</sup> It is noteworthy that among individuals with a MHA, a history of TBI is also common.<sup>12-23</sup>

Despite these alarming statistics and the plethora of research establishing a relationship between TBI and MHA, a systems analysis of community and health services for TBI in Ontario identified a lack of appropriate services and community support for individuals with a TBI and MHA.<sup>24</sup> Efforts to develop more effective and early intervention and care continue to be challenged by the current siloing of the TBI and MHA systems. This need for integrated healthcare has been recognized globally<sup>25-26</sup> and across many health conditions and settings.<sup>27-32</sup> Most recently, the World Health Assembly adopted the “Framework on Integrated People-Centred Health Services”<sup>33</sup> with the vision that “all people have equal access to quality health services that are co-produced in a way that meets their life course needs and respects social preferences, are coordinated across the continuum of care, and are comprehensive, safe, effective, timely, efficient and acceptable; and all carers are motivated, skilled and operate in a supportive environment”.<sup>33</sup> Such integrated care is attractive, as it holds the potential to enable the health systems to provide care that addresses the priorities and needs of persons with lived experience, and improve their experiences in transitions across their continuum of care, to positively impact patient outcome and quality of life.

Building on this vision, this protocol is for a systematic review that (1) describes the current types of integrated care for TBI and MHA and (2) identifies the barriers and facilitators to integrating health services for individuals with TBI and MHA. It is recognized that there are numerous concepts and definitions of integration currently applied in the literature,<sup>33-34</sup> as many factors impact the delivery of health services in any given setting,<sup>34-35</sup> making it difficult to identify one definition of health service integration. As such, this protocol will form a systematic review that aims to identify all forms of integration of care (e.g., vertical, horizontal, clinical, functional integration) to inform policy and programs to develop integrated care for TBI and MHA.

### Methods and Analysis

#### *Search Strategy*

The following databases will be searched for relevant articles:

- 1
- 2
- 3 1. MEDLINE In-Process and Other Non-Indexed Citations and MEDLINE;
- 4 2. EMBASE;
- 5 3. PsycINFO;
- 6 4. CINAHL;
- 7 5. Cochrane Central Register of Controlled Trials;
- 8 6. Sociological Abstracts; and
- 9 7. Dissertations & Theses Global.
- 10
- 11

12 The search strategy for this protocol is available through the online supplementary additional file 1. This  
 13 search strategy will include the use of text words and subject headings (e.g., MeSH, Emtree) related to the  
 14 following concepts:

- 15
- 16 A. TBI;
- 17 B. Substance abuse, gambling, or mental health;
- 18 C. Integrated healthcare;
- 19 D. Barrier and facilitator; and
- 20 E. Healthcare access.
- 21

22 The primary search strategy (concepts A + B + C) will identify papers that discuss integrated healthcare  
 23 in a population with TBI and MHA. To complement this primary search strategy, an additional search  
 24 (concepts A + B + D + E) will be included, based on the search strategies of other published reviews<sup>27 31 32</sup>  
 25<sup>36-38</sup> and the “Framework on Integrated People-Centred Health Services”, adopted by the World Health  
 26 Organization in 2016.<sup>33</sup> These two searches will be combined with an “OR” statement to complete the  
 27 strategy for each of the databases searched, with the exception of the database Sociological Abstracts,  
 28 where the strategy will be reduced (concepts A + B) due to paucity of results.

29 Searches will be limited to English language publications and exclude animal studies when possible.  
 30 Additional limits and search fields will be applied, when applicable, to exclude conference abstracts,  
 31 magazines, books, and encyclopedias. Records returned from this search strategy will be managed in  
 32 EndNote.

### 33 *Study Selection*

34 For all databases, a first screen will be conducted by two reviewers who will independently assess all  
 35 titles and abstracts for eligibility based on pre-determined inclusion criteria:

- 36
- 37
- 38 1. Describe or evaluate a (a) policy, (b) program, or (c) intervention/treatment at the health service  
 39 delivery level for individuals with TBI and/or MHA identified in the literature to be prevalent  
 40 among the TBI population (addictions/substance use, problem gambling, mood and personality  
 41 disorders, schizophrenia and psychosis, anxiety and depression, trauma and stress disorder, OCD,  
 42 ADHD, conduct disorder);<sup>12-23</sup> OR
- 43 2. Screen or diagnosis for a TBI in a health service for MHA; OR
- 44 3. Screen or diagnosis for a MHA in a health service for TBI; AND
- 45 4. Quantitative, qualitative, or mixed method studies, or review papers that report primary research  
 46 findings related to TBI and/or MHA care; AND
- 47 5. Full-text available.
- 48
- 49
- 50
- 51
- 52
- 53

54 Articles that meet all of the above criteria will be included for the second screen, which will be a full-text  
 55 screen. However, articles that are narrative, commentaries, or describe a theory or framework, and articles  
 56

1  
2  
3 that look at the broader brain injury population (e.g., acquired brain injury, trauma patients) without  
4 specific mention of TBI will be excluded.  
5

6 Two reviewers will independently assess the full-text articles for fulfillment of the following pre-  
7 determined inclusion criteria:  
8

- 9 1. Describe or evaluate a (a) policy, (b) program, or (c) intervention/treatment at the health service  
10 delivery level for individuals with TBI and MHA of interest OR
- 11 2. Screen or diagnosis for a TBI in a health service for MHA; OR
- 12 3. Screen or diagnosis for a MHA in a health service for TBI; AND
- 13 4. Describe or evaluate an actual, applied experience of integration.  
14

15 The reference lists of included full-text articles will also be hand-searched for additional relevant articles.  
16 The study selection process and the reasons for exclusions at the full-text level will be presented using the  
17 Preferred Reporting Items for Systematic Reviews and Meta-Analyses (PRISMA) study flow diagram.  
18  
19

### 20 21 *Data Extraction*

22 The following data will be abstracted independently by two reviewers, with the goal of extracting  
23 standardized information that describes the context of the integration activity and associated barriers and  
24 facilitators:  
25  
26

- 27 1. Author and publication year
- 28 2. Country of study
- 29 3. Funding source (potential conflict of interest from funding? Y/N)
- 30 4. Research objective(s)
- 31 5. Study design
- 32 6. Overall and sex/gender specific participant characteristics and sample size – e.g.,  
33 sociodemographics (age, race/ethnicity, and other SES), TBI (Y/N, severity, cause of injury, time  
34 since injury), MHA (Y/N – specify condition(s), time since diagnosis), comorbidities
- 35 7. Description of integration activity
- 36 8. Results of integration activity (stratify by sex/gender, if available)
- 37 9. Barriers (stratify by sex/gender, if available)
- 38 10. Facilitators (stratify by sex/gender, if available)
- 39 11. Additional comments/notes from reviewers  
40  
41  
42  
43  
44  
45

### 46 *Quality Assessment*

47 Controlled intervention, observational cohort and cross-sectional, case-control, before-after (pre-post)  
48 with no control group, and case series studies as well as systematic reviews and meta-analyses will be  
49 assessed using quality assessment tools created specifically for each study design by the methodologists  
50 from the National Institutes of Health and Research Triangle Institute International.<sup>39</sup> Qualitative studies  
51 will be assessed using the *Critical Appraisal Skills Programme* (CASP) checklist.<sup>40</sup> Two reviewers will  
52 independently assess each article that passes the full-text screen. In the case of rating discrepancies,  
53 reviewers will either come to a consensus or a third, independent reviewer will evaluate the study and  
54 resolve any disagreements.  
55  
56  
57  
58  
59  
60



### *Data Synthesis*

A narrative synthesis will be conducted using tools and techniques informed by the *Guidance on the Conduct of Narrative Synthesis in Systematic Reviews*.<sup>41</sup> The extracted data elements described above and results from the quality assessment will be “tabulated”. Where data are available, the extracted data elements will be tabulated by sex (if the original study examined sex as it relates to the biological attributes associated with “physical and physiological features including chromosomes, gene expression, hormone levels and functions, and reproductive/sexual anatomy”)<sup>42</sup> and gender (if the original study examined and intended to assess “the constructed roles, behaviours, expressions, and identifies of girls, women, boys, men, and gender diverse people”).<sup>42</sup> These findings will be “grouped and clustered” into the five recommended strategies of the “Framework on Integrated Person-Centred Care”<sup>33</sup> and, where applicable, type/context of integrated care/activity. Finally, a “textual description” will summarize each included study, focusing on the type of integrated care/activity as it relates to the recommended strategies of the Framework, and associated sex/gender specific barriers and facilitators.

### **Ethics and Dissemination**

Ethics review will not be required because only publicly available published data will be analyzed. Findings from the systematic review will be published in peer-reviewed journals, presented at scientific meetings, and summarized for stakeholders of the ‘Integrating Brain Injury, Mental Health, and Addictions Research Program’, funded by the Ontario Ministry of Health and Long-Term Care.<sup>43</sup>

### **Strengths and Limitations**

It is recognized that a major limitation of this systematic review is the exclusion of non-English language studies. Evidence on integrating TBI and MHA in jurisdictions where English is not a primary language may be missed, limiting the comprehensiveness of this systematic review. However, there are numerous strengths of this review, including those that aim to maximize the retrieval and inclusion of relevant data. The primary search strategy for this review will be supplemented with a secondary search, aimed to capture articles that describe integrations of healthcare but do not describe their study as such. This was added recognizing that some interventions, such as screening for a TBI among individuals with MHA, may not be described as a form of integration and would be missed in the primary search. This additional search will ensure that such forms of integrated care are captured in this review. Similarly, the title and abstract screen will be purposely broad to include articles that describe policy, programs, or interventions/treatments for individuals with TBI and/or MHA, recognizing that many abstracts may focus on describing data primarily for only the TBI or MHA populations. Including these articles for the full-text screen will reduce the risk of missing relevant articles that describe their study predominantly from the perspective of TBI or MHA. Finally, theses will also be searched to capture early work, such as pilots, of integrated care for TBI and MHA that may not be published in peer-reviewed journals.

### **Conclusions**

To the best of our knowledge, this is the first protocol for a systematic review that describes the types of integrated care for TBI and MHA currently implemented, and identifies the barriers and facilitators to

1  
2  
3 integrating care for this population. Informed by the internationally adopted *Framework on Integrated*  
4 *Person-Centred Health Services*,<sup>33</sup> findings hold the potential to impact policy and planning for integrated  
5 care for TBI and MHA, and address a recognized gap in TBI care.  
6  
7

### 8 9 **Acknowledgements**

10  
11 The authors would like to acknowledge the support of Ms. Jessica Babineau, Information Specialist at the  
12 Toronto Rehabilitation Institute-University Health Network, for assistance in developing the search  
13 strategy, and Dr. Tatyana Mollayeva for assistance in identifying appropriate quality appraisal tools for  
14 this review.  
15

### 16 17 **Author's Contributions**

18  
19 VC conceptualized the study, formulated the design, and drafted the manuscript. VC and DT collaborated  
20 with JB (Information Specialist) to develop the search strategy. DT and AC critically reviewed the  
21 manuscript, and all authors read and approved the final manuscript.  
22  
23

### 24 25 **Funding Statement**

26  
27 This study was conducted as part of the 2017/18 Health System Research Fund Program Awards.  
28 'Integrating Brain Injury, Mental Health, and Addictions'. Ministry Grant #267.  
29  
30

### 31 32 **Competing Interests**

33  
34 None declared  
35  
36  
37  
38  
39  
40  
41  
42  
43  
44  
45  
46  
47  
48  
49  
50  
51  
52  
53  
54  
55  
56  
57  
58  
59  
60

## References

1. Menon DK, Schwab K, Wright DW, et al. Position statement: definition of traumatic brain injury. *Arch Phys Med Rehabil* 2010;91(11):1637-40. doi: 10.1016/j.apmr.2010.05.017 [published Online First: 2010/11/04]
2. Challacombe L. The Epidemiology of HIV in Canada <https://www.catie.ca/factsheets/epidemiology/epidemiology-hiv-canada>: CATIE; 2018 [accessed September 11 2018].
3. Ontario CC. Ontario Cancer Statistics 2018. Toronto, Ontario: Cancer Care Ontario, 2018:172.
4. Noonan VK, Fingas M, Farry A, et al. Incidence and prevalence of spinal cord injury in Canada: a national perspective. *Neuroepidemiology* 2012;38(4):219-26. doi: 10.1159/000336014 [published Online First: 2012/05/05]
5. Gilmour H, Ramage-Morin PL, Wong SL. Multiple sclerosis: Prevalence and impact. Health Reports: Statistics Canada, 2018:3-8.
6. Mapping Connections: An understanding of neurological conditions in Canada. The National Population Health Study of Neurological Conditions. <https://www.canada.ca/en/public-health/services/reports-publications/mapping-connections-understanding-neurological-conditions.html>: A partnership between Neurological Health Charities Canada, The Public Health Agency of Canada, Health Canada and The Canadian Institutes of Health Research, 2014.
7. Canada S. Table 17-10-0005-01 Population estimates on July 1st, by age and sex <https://www150.statcan.gc.ca/t1/tbl1/en/cv.action?pid=1710000501>: Statistics Canada; 2018 [accessed September 11 2018].
8. Ilie G, Adlaf EM, Mann RE, et al. Associations between a History of Traumatic Brain Injuries and Current Cigarette Smoking, Substance Use, and Elevated Psychological Distress in a Population Sample of Canadian Adults. *J Neurotrauma* 2015;32(14):1130-4. doi: 10.1089/neu.2014.3619 [published Online First: 2014/12/17]
9. Ilie G, Boak A, Adlaf EM, et al. Prevalence and correlates of traumatic brain injuries among adolescents. *JAMA* 2013;309(24):2550-52. doi: 10.1001/jama.2013.6750
10. Ilie G, Mann RE, Boak A, et al. Suicidality, bullying and other conduct and mental health correlates of traumatic brain injury in adolescents. *PLoS One* 2014;9(4):e94936. doi: 10.1371/journal.pone.0094936 [published Online First: 2014/04/17]
11. Ilie G, Mann RE, Hamilton H, et al. Substance Use and Related Harms Among Adolescents With and Without Traumatic Brain Injury. *J Head Trauma Rehabil* 2015;30(5):293-301. doi: 10.1097/HTR.000000000000101 [published Online First: 2014/11/27]
12. Adeyemo BO, Biederman J, Zafonte R, et al. Mild Traumatic Brain Injury and ADHD: A Systematic Review of the Literature and Meta-Analysis. *J Atten Disord* 2014;18(7):576-84. doi: 10.1177/1087054714543371
13. Whelan-Goodinson R, Ponsford J, Johnston L, et al. Psychiatric Disorders Following Traumatic Brain Injury: Their Nature and Frequency. *J Head Trauma Rehabil* 2009;24(5):324-32. doi: 10.1097/HTR.0b013e3181a712aa
14. Max JE, Lansing AE, Koele SL, et al. Attention Deficit Hyperactivity Disorder in Children and Adolescents Following Traumatic Brain Injury. *Dev Neuropsychol* 2004;25(1-2): 159-77. doi: 10.1080/87565641.2004.9651926
15. Max JE, Wilde EA, D. BE, et al. Psychiatric Disorders After Pediatric Traumatic Brain Injury: A Prospective, Longitudinal, Controlled Study. *J Neuropsychiatry Clin Neurosci* 2012;24(4):427-36. doi: 10.1176/appi.neuropsych.12060149
16. Orlovska S, Pedersen MS, Benros ME, et al. Head Injury as Risk Factor for Psychiatric Disorders: A Nationwide Register-Based Follow-Up Study of 113,906 Persons With Head Injury. *Am J Psychiatry* 2014;171(4):463-69.

17. Schachar RJ, Park LS, Dennis M. Mental Health Implications of Traumatic Brain Injury (TBI) in Children and Youth. *J Can Acad Child Adolesc Psychiatry* 2015;24(2):100-8.
18. Bryant RA, O'Donnell ML, Creamer M, et al. The Psychiatric Sequelae of Traumatic Injury. *Am J Psychiatry* 2010;167(3):312-20.
19. Silver JM, Kramer R, Greenwald S, et al. The association between head injuries and psychiatric disorders: findings from the New Haven NIMH Epidemiologic Catchment Area Study. *Brain Inj* 2001;15(11):935-45. doi: 10.1080/02699050110065295 [published Online First: 2001/11/02]
20. Perry DC, Sturm VE, Peterson MJ, et al. Association of traumatic brain injury with subsequent neurological and psychiatric disease: a meta-analysis. *J Neurosurg* 2016;124(2):511-26. doi: 10.3171/2015.2.Jns14503
21. Massagli TL, Fann JR, Burington BE, et al. Psychiatric illness after mild traumatic brain injury in children11No commercial party having a direct financial interest in the results of the research supporting this article has or will confer a benefit on the author(s) or on any organization with which the author(s) is/are associated. *Arch Phys Med Rehab* 2004;85(9):1428-34. doi: <https://doi.org/10.1016/j.apmr.2003.12.036>
22. Gibson R, Purdy SC. Mental health disorders after traumatic brain injury in a New Zealand caseload. *Brain Inj* 2015;29(3):306-12. doi: 10.3109/02699052.2014.896471
23. Albicini M, Eggleston M, McKinlay A. The prevalence of traumatic brain injury, comorbid anxiety and other psychiatric disorders in an outpatient child and adolescent mental health service. *J Ment Health* 2017:1-7. doi: 10.1080/09638237.2017.1385733
24. Munce SE, Laan RV, Levy C, et al. Systems analysis of community and health services for acquired brain injury in Ontario, Canada. *Brain Inj* 2014;28(8):1042-51. doi: 10.3109/02699052.2014.890744 [published Online First: 2014/03/25]
25. Legido-Quigley H, Montgomery CM, Khan P, et al. Integrating tuberculosis and HIV services in low- and middle-income countries: a systematic review. *Trop Med Int Health* 2013;18(2):199-211. doi: 10.1111/tmi.12029 [published Online First: 2012/12/12]
26. Sigfrid L, Murphy G, Haldane V, et al. Integrating cervical cancer with HIV healthcare services: A systematic review. *PLoS One* 2017;12(7):e0181156. doi: 10.1371/journal.pone.0181156 [published Online First: 2017/07/22]
27. Atun R, de Jongh T, Secci F, et al. A systematic review of the evidence on integration of targeted health interventions into health systems. *Health Policy Plan* 2010;25(1):1-14. doi: 10.1093/heapol/czp053 [published Online First: 2009/12/05]
28. Chuah FLH, Haldane VE, Cervero-Liceras F, et al. Interventions and approaches to integrating HIV and mental health services: a systematic review. *Health Policy Plan* 2017;32(suppl\_4):iv27-iv47. doi: 10.1093/heapol/czw169 [published Online First: 2017/11/07]
29. Haldane V, Cervero-Liceras F, Chuah FL, et al. Integrating HIV and substance use services: a systematic review. *J Int AIDS Soc* 2017;20(1):21585. doi: 10.7448/IAS.20.1.21585 [published Online First: 2017/07/12]
30. Haldane V, Legido-Quigley H, Chuah FLH, et al. Integrating cardiovascular diseases, hypertension, and diabetes with HIV services: a systematic review. *AIDS Care* 2018;30(1):103-15. doi: 10.1080/09540121.2017.1344350 [published Online First: 2017/07/07]
31. Wakida EK, Akena D, Okello ES, et al. Barriers and facilitators to the integration of mental health services into primary health care: a systematic review protocol. *Syst Rev* 2017;6(1):171. doi: 10.1186/s13643-017-0561-0 [published Online First: 2017/08/27]
32. Watt N, Sigfrid L, Legido-Quigley H, et al. Health systems facilitators and barriers to the integration of HIV and chronic disease services: a systematic review. *Health Policy Plan* 2017;32(suppl\_4):iv13-iv26. doi: 10.1093/heapol/czw149 [published Online First: 2017/07/02]

- 1
- 2
- 3 33. Secretariat WHO. Framework on Integrated People-Centred Health Services. Geneva, Switzerland:  
4 World Health Organization, 2016.
- 5 34. Suter E, Oelke ND, Adair CE, et al. Health Systems Integration. Definitions, Processes & Impact: A  
6 Research Synthesis: Alberta Health Services, 2007.
- 7 35. Heyeres M, McCalman J, Tsey K, et al. The Complexity of Health Service Integration: A Review of  
8 Reviews. *Front Public Health* 2016;4:223. doi: 10.3389/fpubh.2016.00223 [published Online  
9 First: 2016/11/02]
- 10 36. Balogh R, McMorris CA, Lunsy Y, et al. Organising healthcare services for persons with an  
11 intellectual disability. *Cochrane Database Syst Rev* 2016;4:CD007492. doi:  
12 10.1002/14651858.CD007492.pub2 [published Online First: 2016/04/12]
- 13 37. Briggs CJ, Garner P. Strategies for integrating primary health services in middle- and low-income  
14 countries at the point of delivery. *Cochrane Database Syst Rev* 2006(2):CD003318. doi:  
15 10.1002/14651858.CD003318.pub2 [published Online First: 2006/04/21]
- 16 38. Kantor V, Knefel M, Lueger-Schuster B. Perceived barriers and facilitators of mental health service  
17 utilization in adult trauma survivors: A systematic review. *Clin Psychol Rev* 2017;52:52-68. doi:  
18 10.1016/j.cpr.2016.12.001 [published Online First: 2016/12/26]
- 19 39. National Heart L, and Blood Institute. Background: Development and Use of Study Quality  
20 Assessment Tools <https://www.nhlbi.nih.gov/node/80102>: U.S. Department of Health and  
21 Human Services.; [accessed September 10 2018].
- 22 40. Programme CAS. CASP Qualitative Checklist [https://casp-uk.net/wp-](https://casp-uk.net/wp-content/uploads/2018/01/CASP-Qualitative-Checklist.pdf2018)  
23 [content/uploads/2018/01/CASP-Qualitative-Checklist.pdf2018](https://casp-uk.net/wp-content/uploads/2018/01/CASP-Qualitative-Checklist.pdf2018) [accessed September 10 2018].
- 24 41. Popay J, Roberts H, Sowden A, et al. Guidance on the conduct of narrative synthesis in systematic  
25 reviews. *A product from the ESRC methods programme Version 2006*;1:b92.
- 26 42. Definitions of Sex and Gender Canada: Canadian Institutes of Health Research; 2015 [updated June  
27 17, 2015. Available from: <http://www.cihr-irsc.gc.ca/e/47830.html> accessed September 21  
28 2018.
- 29 43. Colantonio A, Balogh R, Chan V, et al. Integrating Brain Injury, Mental Health, and Addictions.  
30 Toronto: Ministry of Health and Long Term Care, 2017.
- 31
- 32
- 33
- 34
- 35
- 36
- 37
- 38
- 39
- 40
- 41
- 42
- 43
- 44
- 45
- 46
- 47
- 48
- 49
- 50
- 51
- 52
- 53
- 54
- 55
- 56
- 57
- 58
- 59
- 60

## **SEARCH STRATEGIES**

Database: Ovid MEDLINE: Epub Ahead of Print, In-Process & Other Non-Indexed Citations, Ovid MEDLINE® Daily and Ovid MEDLINE<1946 to August 10, 2018>

Search Strategy:

- 
- 1 exp Brain Injuries/ (62332)
  - 2 exp Brain Injuries, Traumatic/ (9743)
  - 3 exp Brain Concussion/ (7389)
  - 4 Craniocerebral Trauma/ (21314)
  - 5 tbi\*2.tw,kf. (22847)
  - 6 mtbi\*2.tw,kf. (2223)
  - 7 wrTBI\*2.tw,kf. (12)
  - 8 concuss\*.tw,kf. (7606)
  - 9 postconcuss\*.tw,kf. (1154)
  - 10 ((brain or head\* or cerebr\* or crani\* or skull\* or intracran\*) adj2 (injur\* or trauma\* or damag\* or wound\* or fracture\* or contusion\*).tw,kf. (128306)
  - 11 ((brain\* or cerebr\* or intracerebr\* or crani\* or intracran\* or head\* or subdural\* or epidural\* or extradural\*) adj (haematoma\* or hematoma\* or hemorrhag\* or haemorrhag\*).tw,kf. (44556)
  - 12 "shaken baby".tw,kf. (605)
  - 13 or/1-12 (196484)
  - 14 exp Substance-Related Disorders/ (259829)
  - 15 gambling/ (4842)
  - 16 ((drug or substance? or alcohol or opioid? or amphetamine? or cocaine or marijuana or cannabis or phencyclidine or benzodiaz\*) adj2 (misuse or abuse\* or addict\* or depend\*).tw,kf. (108773)
  - 17 gambli???.tw,kf. (8414)
  - 18 (alcoholi\* or drinker\* or drinking).tw,kf. (177792)
  - 19 or/14-18 (424000)
  - 20 13 and 19 (3854)
  - 21 Mental Health/ (31512)
  - 22 mental disorders/ or exp anxiety disorders/ or exp "bipolar and related disorders"/ or "disruptive, impulse control, and conduct disorders"/ or exp dissociative disorders/ or exp "feeding and eating disorders"/ or exp mood disorders/ or neurodevelopmental disorders/ or anxiety, separation/ or exp "attention deficit and disruptive behavior disorders"/ or child behavior disorders/ or exp child development disorders, pervasive/ or schizophrenia, childhood/ or exp

1  
2  
3  
4 personality disorders/ or exp "schizophrenia spectrum and other psychotic disorders"/ or exp  
5 "trauma and stressor related disorders"/ (586165)  
6  
7 23 Depression/ (103355)  
8 24 exp Depressive Disorder, Major/ (26327)  
9 25 exp Depressive Disorder/ (99948)  
10  
11 26 ((mental or psych\*) adj (health\* or illness\* or disease\* or condition\* or disorder?)).tw,kf.  
12 (241708)  
13  
14 27 anxiety.tw,kf. (163525)  
15  
16 28 PTSD.tw,kf. (20669)  
17  
18 29 post-traumatic stress disorder?.tw,kf. (9534)  
19  
20 30 obsessive compulsive.tw,kf. (15892)  
21  
22 31 (depression? or depressed or depressiv\* or MDD).tw,kf. (392484)  
23  
24 32 Schizophreni\*.tw,kf. (116454)  
25  
26 33 bipolar.tw,kf. (56704)  
27  
28 34 conduct disorder?.tw,kf. (4279)  
29  
30 35 attention deficit.tw,kf. (24841)  
31  
32 36 hoard\*.tw,kf. (1461)  
33  
34 37 or/21-36 (1084130)  
35  
36 38 13 and 37 (13021)  
37  
38 39 20 or 38 (15916)  
39  
40 40 exp "Delivery of Health Care, Integrated"/ (11218)  
41  
42 41 ((vertical or horizontal or integrat\* or coordinat\* or co-ordinat\* or link\*) and (care or health  
43 care or healthcare or service? or treatment? or therap\* or psychotherap\* or program\*)).tw,kf.  
44 (452323)  
45  
46 42 (integrat\* adj3 (care or health care or healthcare or service? or treatment? or therap\* or  
47 psychotherap\* or program\*)).tw,kf. (33149)  
48  
49 43 (connect\* adj3 (care or health care or healthcare or service? or treatment? or therap\* or  
50 psychotherap\* or program\*)).tw,kf. (4447)  
51  
52 44 (coordinat\* adj3 (care or health care or healthcare or service? or treatment? or therap\* or  
53 psychotherap\* or program\*)).tw,kf. (14002)  
54  
55 45 or/40-44 (461475)  
56  
57 46 39 and 45 (574)  
58  
59 47 (barrier? or hurdle? or obstacle? or challeng\* or incentiv\* or obstruct\* or refusal? or  
60 impedim\* or promot\* or facilitat\* or support\* or enabl\* or cause? or reason? or encourag\* or  
predict\* or hinder\* or willingness).tw,kf. (6647308)  
48 ((seek? or seeking) adj3 (help\* or treatment? or care)).tw,kf. (31739)  
49 47 or 48 (6661497)

- 1  
2  
3  
4 50 Community health services/ (30003)  
5 51 exp Primary Health Care/ (139690)  
6 52 Patient participation/ (22821)  
7  
8 53 Patient Care Team/ (60979)  
9 54 case management/ (9554)  
10  
11 55 critical pathways/ (6019)  
12 56 exp "continuity of patient care"/ (218438)  
13  
14 57 health education/ (57952)  
15 58 health promotion/ (67033)  
16  
17 59 health planning/ (21288)  
18 60 patient care management/ (3219)  
19 61 comprehensive health care/ (6407)  
20 62 exp "delivery of health care"/ (978727)  
21  
22 63 disease management/ (30690)  
23  
24 64 critical pathways/ (6019)  
25 65 patient-centered care/ (16429)  
26  
27 66 exp "outcome and process assessment (health care)"/ (977104)  
28 67 exp program evaluation/ (68936)  
29  
30 68 quality assurance, health care/ (54119)  
31 69 ((interdisciplin\* or inter-disciplin\* or interprofession\* or inter-profession\* or multidisciplin\* or  
32 multi-disciplin\* or multiprofession\* or multi-profession\*) adj3 (team or care or health care or  
33 healthcare or service? or treatment? or therap\* or program\*)).tw,kf. (38696)  
34  
35 70 (engagement or engage or engaging or empower\* or participat\*).tw,kf. (569356)  
36  
37 71 (governan\* or accountab\*).tw,kf. (25773)  
38  
39 72 (model adj2 care).tw,kf. (8943)  
40  
41 73 (educat\* or screen\* or train\* or transition\* or evaluat\* or coordinat\*).tw,kf. (4766860)  
42  
43 74 or/50-73 (6666001)  
44  
45 75 39 and 49 and 74 (2505)  
46  
47 76 46 or 75 (2867)  
48  
49 77 limit 76 to english language (2676)  
50  
51 78 77 not (exp animals/ not exp humans/) (2521)

\*\*\*\*\*

52  
53 Database: **Cochrane Central Register of Controlled Trials** <2014 to Present>

54 Search Strategy:  
55  
56 -----  
57  
58  
59  
60



- 1 exp Brain Injuries/ (1732)
- 2 exp Brain Injuries, Traumatic/ (1732)
- 3 exp Brain Concussion/ (241)
- 4 Craniocerebral Trauma/ (283)
- 5 tbi\*2.tw,kf. (2040)
- 6 mtbi\*2.tw,kf. (250)
- 7 wrTBI\*2.tw,kf. (0)
- 8 concuss\*.tw,kf. (408)
- 9 postconcuss\*.tw,kf. (102)
- 10 ((brain or head\* or cerebr\* or crani\* or skull\* or intracran\*) adj2 (injur\* or trauma\* or damag\* or wound\* or fracture\* or contusion\*)).tw,kf. (6161)
- 11 ((brain\* or cerebr\* or intracerebr\* or crani\* or intracran\* or head\* or subdural\* or epidural\* or extradural\*) adj (haematoma\* or hematoma\* or hemorrhag\* or haemorrhag\*)).tw,kf. (3526)
- 12 "shaken baby".tw,kf. (9)
- 13 or/1-12 (10514)
- 14 exp Substance-Related Disorders/ (13128)
- 15 gambling/ (298)
- 16 ((drug or substance? or alcohol or opioid? or amphetamine? or cocaine or marijuana or cannabis or phencyclidine or benzodiaz\*) adj2 (misuse or abuse\* or addict\* or depend\*)).tw,kf. (10967)
- 17 gambli???.tw,kf. (623)
- 18 (alcoholi\* or drinker\* or drinking).tw,kf. (11000)
- 19 or/14-18 (26428)
- 20 13 and 19 (185)
- 21 Mental Health/ (1123)
- 22 mental disorders/ or exp anxiety disorders/ or exp "bipolar and related disorders"/ or "disruptive, impulse control, and conduct disorders"/ or exp dissociative disorders/ or exp "feeding and eating disorders"/ or exp mood disorders/ or neurodevelopmental disorders/ or anxiety, separation/ or exp "attention deficit and disruptive behavior disorders"/ or child behavior disorders/ or exp child development disorders, pervasive/ or schizophrenia, childhood/ or exp personality disorders/ or exp "schizophrenia spectrum and other psychotic disorders"/ or exp "trauma and stressor related disorders"/ (26375)
- 23 Depression/ (9417)
- 24 exp Depressive Disorder, Major/ (3972)
- 25 exp Depressive Disorder/ (10136)
- 26 ((mental or psych\*) adj (health\* or illness\* or disease\* or condition\* or disorder?)).tw,kf. (17190)

- 1  
2  
3  
4 27 anxiety.tw,kf. (28440)  
5 28 PTSD.tw,kf. (2944)  
6 29 post-traumatic stress disorder?.tw,kf. (994)  
7  
8 30 obsessive compulsive.tw,kf. (1950)  
9 31 (depression? or depressed or depressiv\* or MDD).tw,kf. (53605)  
10 32 Schizophreni\*.tw,kf. (12510)  
11 33 bipolar.tw,kf. (5592)  
12 34 conduct disorder?.tw,kf. (313)  
13 35 attention deficit.tw,kf. (2995)  
14 36 hoard\*.tw,kf. (53)  
15 37 or/21-36 (103330)  
16 38 13 and 37 (847)  
17 39 20 or 38 (939)  
18 40 exp "Delivery of Health Care, Integrated"/ (314)  
19 41 ((vertical or horizontal or integrat\* or coordinat\* or co-ordinat\* or link\*) and (care or health  
20 care or healthcare or service? or treatment? or therap\* or psychotherap\* or program\*)).tw,kf.  
21 (29535)  
22 42 (integrat\* adj3 (care or health care or healthcare or service? or treatment? or therap\* or  
23 psychotherap\* or program\*)).tw,kf. (4849)  
24 43 (connect\* adj3 (care or health care or healthcare or service? or treatment? or therap\* or  
25 psychotherap\* or program\*)).tw,kf. (688)  
26 44 (coordinat\* adj3 (care or health care or healthcare or service? or treatment? or therap\* or  
27 psychotherap\* or program\*)).tw,kf. (1369)  
28 45 or/40-44 (30171)  
29 46 39 and 45 (88)  
30 47 (barrier? or hurdle? or obstacle? or challeng\* or incentiv\* or obstruct\* or refusal? or  
31 impedim\* or promot\* or facilitat\* or support\* or enabl\* or cause? or reason? or encourag\* or  
32 predict\* or hinder\* or willingness).tw,kf. (311112)  
33 48 ((seek? or seeking) adj3 (help\* or treatment? or care)).tw,kf. (3523)  
34 49 47 or 48 (312722)  
35 50 Community health services/ (898)  
36 51 exp Primary Health Care/ (4481)  
37 52 Patient participation/ (1122)  
38 53 Patient Care Team/ (1538)  
39 54 case management/ (655)  
40 55 critical pathways/ (171)  
41 56 exp "continuity of patient care"/ (579)

- 1  
2  
3  
4 57 health education/ (3492)  
5 58 health promotion/ (4893)  
6 59 health planning/ (34)  
7  
8 60 patient care management/ (119)  
9 61 comprehensive health care/ (67)  
10 62 exp "delivery of health care"/ (38828)  
11 63 disease management/ (804)  
12 64 critical pathways/ (171)  
13 65 patient-centered care/ (450)  
14 66 exp "outcome and process assessment (health care)"/ (127732)  
15 67 exp program evaluation/ (5433)  
16 68 quality assurance, health care/ (612)  
17 69 ((interdisciplin\* or inter-disciplin\* or interprofession\* or inter-profession\* or multidisciplin\* or  
18 multi-disciplin\* or multiprofession\* or multi-profession\*) adj3 (team or care or health care or  
19 healthcare or service? or treatment? or therap\* or program\*)).tw,kf. (3163)  
20 70 (engagement or engage or engaging or empower\* or participat\*).tw,kf. (73190)  
21 71 (governan\* or accountab\*).tw,kf. (574)  
22 72 (model adj2 care).tw,kf. (1606)  
23 73 (educat\* or screen\* or train\* or transition\* or evaluat\* or coordinat\*).tw,kf. (428554)  
24 74 or/50-73 (543646)  
25 75 39 and 49 and 74 (292)  
26 76 46 or 75 (336)  
27 77 limit 76 to english language (187)  
28  
29  
30  
31  
32  
33  
34  
35  
36  
37

38 \*\*\*\*\*  
39  
40

41 Database: **Embase Classic+Embase** <1947 to 2018 August 20>

42 Search Strategy:  
43  
44

- 45 -----  
46 1 exp brain injury/ (170129)  
47 2 head injury/ (50510)  
48 3 tbi\*2.tw. (37286)  
49 4 mtbi\*2.tw. (3458)  
50 5 wrTBI\*2.tw. (16)  
51 6 concuss\*.tw. (10071)  
52 7 postconcuss\*.tw. (1412)  
53  
54  
55  
56  
57  
58  
59  
60

- 1  
2  
3  
4 8 ((brain or head\* or cerebr\* or crani\* or skull\* or intracran\*) adj2 (injur\* or trauma\* or damag\*  
5 or wound\* or fracture\* or contusion\*)).tw. (173261)  
6  
7 9 ((brain\* or cerebr\* or intracerebr\* or crani\* or intracran\* or head\* or subdural\* or epidural\* or  
8 extradural\*) adj (haematoma\* or hematoma\* or hemorrhag\* or haemorrhag\*)).tw. (64309)  
9  
10 10 "shaken baby".tw. (743)  
11  
12 11 or/1-10 (329144)  
13  
14 12 addiction/ (51840)  
15  
16 13 exp drug dependence/ (227621)  
17  
18 14 pathological gambling/ (5577)  
19  
20 15 ((drug or substance? or alcohol or opioid? or amphetamine? or cocaine or marijuana or  
21 cannabis or phencyclidine or benzodiaz\*) adj2 (misuse or abuse\* or addict\* or depend\*)).tw.  
22 (146297)  
23  
24 16 gambl???.tw. (10917)  
25  
26 17 (alcoholi\* or drinker\* or drinking).tw. (248964)  
27  
28 18 or/12-17 (514147)  
29  
30 19 11 and 18 (6730)  
31  
32 20 exp mental health/ (132537)  
33  
34 21 mental disease/ (222219)  
35  
36 22 exp anxiety disorder/ (211380)  
37  
38 23 exp bipolar disorder/ (57278)  
39  
40 24 behavior disorder/ or attention deficit disorder/ or disruptive behavior/ or drug seeking  
41 behavior/ or impulse control disorder/ (107231)  
42  
43 25 exp dissociative disorder/ (8226)  
44  
45 26 exp eating disorder/ (47110)  
46  
47 27 exp mood disorder/ (461687)  
48  
49 28 exp autism/ (57648)  
50  
51 29 exp schizophrenia/ (181763)  
52  
53 30 exp personality disorder/ (59926)  
54  
55 31 exp psychosis/ (284664)  
56  
57 32 ((mental or psych\*) adj (health\* or illness\* or disease\* or condition\* or disorder?)).tw.  
58 (304770)  
59  
60 33 PTSD.tw. (25839)  
34 post-traumatic stress disorder?.tw. (12129)  
35 obsessive compulsive.tw. (20726)  
36 (depression? or depressed or depressiv\* or MDD).tw. (545145)  
37 Schizophreni\*.tw. (158068)  
38 bipolar.tw. (81682)

- 1  
2  
3  
4 39 conduct disorder?.tw. (5392)  
5 40 attention deficit.tw. (31286)  
6 41 hoard\*.tw. (1814)  
7  
8 42 or/20-41 (1531303)  
9 43 11 and 42 (29736)  
10 44 19 or 43 (34158)  
11 45 integrated health care system/ (9873)  
12 46 ((vertical or horizontal or integrat\* or coordinat\* or co-ordinat\* or link\*) and (care or health  
13 care or healthcare or service? or treatment? or therap\* or psychotherap\* or program\*)).tw.  
14 (624215)  
15 47 (integrat\* adj3 (care or health care or healthcare or service? or treatment? or therap\* or  
16 psychotherap\* or program\*)).tw. (44675)  
17  
18 48 (connect\* adj3 (care or health care or healthcare or service? or treatment? or therap\* or  
19 psychotherap\* or program\*)).tw. (6653)  
20  
21 49 (coordinat\* adj3 (care or health care or healthcare or service? or treatment? or therap\* or  
22 psychotherap\* or program\*)).tw. (19801)  
23  
24 50 or/45-49 (634621)  
25  
26 51 44 and 50 (1382)  
27  
28 52 (barrier? or hurdle? or obstacle? or challeng\* or incentiv\* or obstruct\* or refusal? or  
29 impedim\* or promot\* or facilitat\* or support\* or enabl\* or cause? or reason? or encourag\* or  
30 predict\* or hinder\* or willingness).tw. (8662026)  
31  
32 53 ((seek? or seeking) adj3 (help\* or treatment? or care)).tw. (40702)  
33  
34 54 52 or 53 (8679961)  
35  
36 55 exp community care/ (116494)  
37  
38 56 exp primary health care/ (147878)  
39  
40 57 patient participation/ (23829)  
41  
42 58 exp patient care/ (719197)  
43  
44 59 clinical pathway/ (7778)  
45  
46 60 exp health education/ (297823)  
47  
48 61 health care planning/ (94317)  
49  
50 62 exp health care delivery/ (2870808)  
51  
52 63 disease management/ (19050)  
53  
54 64 outcome assessment/ (432109)  
55  
56 65 exp health care quality/ (2772612)  
57  
58 66 exp program evaluation/ (17544)  
59  
60

- 1  
2  
3  
4 67 ((interdisciplin\* or inter-disciplin\* or interprofession\* or inter-profession\* or multidisciplin\* or  
5 multi-disciplin\* or multiprofession\* or multi-profession\*) adj3 (team or care or health care or  
6 healthcare or service? or treatment? or therap\* or program\*)).tw. (64305)  
7  
8 68 (engagement or engage or engaging or empower\* or participat\*).tw. (743424)  
9  
10 69 (governan\* or accountab\*).tw. (31041)  
11  
12 70 (model adj2 care).tw. (12583)  
13  
14 71 (educat\* or screen\* or train\* or transition\* or evaluat\* or coordinat\*).tw. (6328902)  
15  
16 72 or/55-71 (10373343)  
17  
18 73 44 and 54 and 72 (7037)  
19  
20 74 51 or 73 (7854)  
21  
22 75 limit 74 to english language (7426)  
23  
24 76 75 not ((exp animals/ or exp animal experimentation/ or nonhuman/) not exp human/)  
25 (6887)  
26  
27 77 limit 76 to conference abstracts (2365)  
28  
29 78 76 not 77 (4522)  
30  
31 79 78 not medline.cr. (4055)

32 \*\*\*\*\*

33 Database: **PsycINFO** <1806 to August Week 1 2018>

34 Search Strategy:

- 35 -----  
36 1 exp traumatic brain injury/ (17391)  
37 2 exp head injuries/ (5923)  
38 3 tbi\*2.tw. (9703)  
39 4 mtbi\*2.tw. (1562)  
40 5 wrTBI\*2.tw. (8)  
41 6 concuss\*.tw. (2850)  
42 7 postconcuss\*.tw. (796)  
43 8 ((brain or head\* or cerebr\* or crani\* or skull\* or intracran\*) adj2 (injur\* or trauma\* or damag\*  
44 or wound\* or fracture\* or contusion\*)).tw. (45163)  
45 9 ((brain\* or cerebr\* or intracerebr\* or crani\* or intracran\* or head\* or subdural\* or epidural\* or  
46 extradural\*) adj (haematoma\* or hematoma\* or hemorrhag\* or haemorrhag\*)).tw. (3211)  
47 10 "shaken baby".tw. (185)  
48 11 or/1-10 (49487)  
49 12 exp drug abuse/ (105296)  
50 13 "substance use disorder"/ (5723)  
51  
52  
53  
54  
55  
56  
57  
58  
59  
60

1  
2  
3  
4 14 addiction/ (9744)  
5 15 exp gambling/ (7117)  
6 16 ((drug or substance? or alcohol or opioid? or amphetamine? or cocaine or marijuana or  
7 cannabis or phencyclidine or benzodiaz\*) adj2 (misuse or abuse\* or addict\* or depend\*  
8).tw.  
9 (95808)  
10  
11 17 gambler?.tw. (11158)  
12 18 (alcoholi\* or drinker\* or drinking).tw. (71401)  
13  
14 19 or/12-18 (189802)  
15 20 11 and 19 (1834)  
16 21 mental health/ (57737)  
17 22 mental disorders/ (78899)  
18 23 exp anxiety disorders/ (77257)  
19 24 exp affective disorders/ (151634)  
20 25 exp impulse control disorders/ (1034)  
21 26 conduct disorder/ (4163)  
22 27 behavior disorders/ (9073)  
23 28 exp dissociative disorders/ (5069)  
24 29 exp eating disorders/ (28488)  
25 30 neurodevelopmental disorders/ (1969)  
26 31 autism spectrum disorders/ (38498)  
27 32 exp separation anxiety/ (1529)  
28 33 exp attention deficit disorder/ (24934)  
29 34 exp psychosis/ (109127)  
30 35 exp personality disorders/ (33271)  
31 36 exp posttraumatic stress disorder/ (29576)  
32 37 ((mental or psych\*) adj (health\* or illness\* or disease\* or condition\* or disorder?)).tw.  
33 (306679)  
34 38 anxiety.tw. (180502)  
35 39 PTSD.tw. (29697)  
36 40 post-traumatic stress disorder?.tw. (9443)  
37 41 obsessive compulsive.tw. (19372)  
38 42 (depression? or depressed or depressiv\* or MDD).tw. (278508)  
39 43 Schizophreni\*.tw. (118127)  
40 44 bipolar.tw. (37311)  
41 45 conduct disorder?.tw. (7217)  
42 46 attention deficit.tw. (29043)  
43 47 hoard\*.tw. (1855)

- 1  
2  
3  
4 48 or/21-47 (887448)  
5 49 11 and 48 (9062)  
6 50 20 or 49 (10045)  
7  
8 51 integrated services/ (3216)  
9 52 ((vertical or horizontal or integrat\* or coordinat\* or co-ordinat\* or link\*) and (care or health  
10 care or healthcare or service? or treatment? or therap\* or psychotherap\* or program\*)).tw.  
11 (152611)  
12  
13 53 (integrat\* adj3 (care or health care or healthcare or service? or treatment? or therap\* or  
14 psychotherap\* or program\*)).tw. (20889)  
15  
16 54 (connect\* adj3 (care or health care or healthcare or service? or treatment? or therap\* or  
17 psychotherap\* or program\*)).tw. (2818)  
18  
19 55 (coordinat\* adj3 (care or health care or healthcare or service? or treatment? or therap\* or  
20 psychotherap\* or program\*)).tw. (5590)  
21  
22 56 or/51-55 (155650)  
23  
24 57 50 and 56 (576)  
25  
26 58 Treatment Barriers/ (4168)  
27  
28 59 (barrier? or hurdle? or obstacle? or challeng\* or incentiv\* or obstruct\* or refusal? or  
29 impedim\* or promot\* or facilitat\* or support\* or enabl\* or cause? or reason? or encourag\* or  
30 predict\* or hinder\* or willingness).tw. (1644346)  
31  
32 60 ((seek? or seeking) adj3 (help\* or treatment? or care)).tw. (24738)  
33  
34 61 or/58-60 (1655245)  
35  
36 62 exp community services/ (31008)  
37  
38 63 primary health care/ (16770)  
39  
40 64 health care services/ (40379)  
41  
42 65 "continuum of care"/ (1628)  
43  
44 66 health care delivery/ (19878)  
45  
46 67 interdisciplinary treatment approach/ (6871)  
47  
48 68 client participation/ (1850)  
49  
50 69 exp case management/ (3343)  
51  
52 70 exp managed care/ (4298)  
53  
54 71 client centered therapy/ (3105)  
55  
56 72 exp "quality of services"/ (17955)  
57  
58 73 exp health education/ or client education/ (20686)  
59  
60 74 health promotion/ (22605)  
75 exp treatment planning/ (6202)  
76 disease management/ (6121)  
77 exp program evaluation/ (19435)



1  
2  
3  
4 78 ((interdisciplin\* or inter-disciplin\* or interprofession\* or inter-profession\* or multidisciplin\* or  
5 multi-disciplin\* or multiprofession\* or multi-profession\*) adj3 (team or care or health care or  
6 healthcare or service? or treatment? or therap\* or program\*)).tw. (11242)  
7  
8 79 (engagement or engage or engaging or empower\* or participat\*).tw. (374143)  
9  
10 80 (governan\* or accountab\*).tw. (25304)  
11  
12 81 (model adj2 care).tw. (3435)  
13  
14 82 (educat\* or screen\* or train\* or transition\* or evaluat\* or coordinat\*).tw. (1245279)  
15  
16 83 or/62-82 (1562608)  
17  
18 84 50 and 61 and 83 (1650)  
19  
20 85 57 or 84 (2011)  
21  
22 86 limit 85 to english language (1934)  
23  
24 87 limit 86 to animal (115)  
25  
26 88 limit 87 to human (33)  
27  
28 89 86 not (87 not 88) (1852)  
29  
30 90 limit 89 to ("0200 book" or "0240 authored book" or "0280 edited book" or "0300  
31 encyclopedia") (458)  
32  
33 91 89 not 90 (1394)  
34

\*\*\*\*\*

Database: CINAHL (searched 2018.08.21)

| #   | Query                                                                                                                                                                                                                     | Limiters/Expanders                                           | Results   |
|-----|---------------------------------------------------------------------------------------------------------------------------------------------------------------------------------------------------------------------------|--------------------------------------------------------------|-----------|
| S81 | S80                                                                                                                                                                                                                       | Limiters - English Language<br>Search modes - Boolean/Phrase | 1,242     |
| S80 | S52 OR S79                                                                                                                                                                                                                | Search modes - Boolean/Phrase                                | 1,250     |
| S79 | S45 AND S55 AND S78                                                                                                                                                                                                       | Search modes - Boolean/Phrase                                | 1,123     |
| S78 | S56 OR S57 OR S58 OR S59 OR S60 OR<br>S61 OR S62 OR S63 OR S64 OR S65 OR<br>S66 OR S67 OR S68 OR S69 OR S70 OR<br>S71 OR S72 OR S73 OR S74 OR S75 OR<br>S76 OR S77                                                        | Search modes - Boolean/Phrase                                | 1,628,534 |
| S77 | (educat* or screen* or train* or<br>transition* or evaluat* or coordinat*)                                                                                                                                                | Search modes - Boolean/Phrase                                | 1,128,349 |
| S76 | (model n2 care)                                                                                                                                                                                                           | Search modes - Boolean/Phrase                                | 11,356    |
| S75 | (governan* or accountab*)                                                                                                                                                                                                 | Search modes - Boolean/Phrase                                | 24,583    |
| S74 | (engagement or engage or engaging or<br>empower* or participat*)                                                                                                                                                          | Search modes - Boolean/Phrase                                | 175,276   |
| S73 | ((interdisciplin* or inter-disciplin* or<br>interprofession* or inter-profession* or<br>multidisciplin* or multi-disciplin* or<br>multiprofession* or multi-profession*) n3<br>(team or care or health care or healthcare | Search modes - Boolean/Phrase                                | 39,697    |

|     |                                                                                                                                                                                                                          |                               |         |
|-----|--------------------------------------------------------------------------------------------------------------------------------------------------------------------------------------------------------------------------|-------------------------------|---------|
|     | or service* or treatment* or therap* or program*))                                                                                                                                                                       |                               |         |
| S72 | (MH "Quality of Health Care+")                                                                                                                                                                                           | Search modes - Boolean/Phrase | 413,487 |
| S71 | (MH "Program Development+")                                                                                                                                                                                              | Search modes - Boolean/Phrase | 51,590  |
| S70 | (MH "Outcome Assessment")                                                                                                                                                                                                | Search modes - Boolean/Phrase | 23,937  |
| S69 | (MH "Process Assessment (Health Care)+")                                                                                                                                                                                 | Search modes - Boolean/Phrase | 5,750   |
| S68 | (MH "Patient Centered Care")                                                                                                                                                                                             | Search modes - Boolean/Phrase | 18,429  |
| S67 | (MH "Disease Management+")                                                                                                                                                                                               | Search modes - Boolean/Phrase | 11,760  |
| S66 | (MH "Health Care Delivery+")                                                                                                                                                                                             | Search modes - Boolean/Phrase | 210,880 |
| S65 | (MH "Patient Care Plans+")                                                                                                                                                                                               | Search modes - Boolean/Phrase | 6,852   |
| S64 | (MH "Health Promotion")                                                                                                                                                                                                  | Search modes - Boolean/Phrase | 39,646  |
| S63 | (MH "Health Education+")                                                                                                                                                                                                 | Search modes - Boolean/Phrase | 88,614  |
| S62 | (MH "Continuity of Patient Care+")                                                                                                                                                                                       | Search modes - Boolean/Phrase | 12,938  |
| S61 | (MH "Critical Path")                                                                                                                                                                                                     | Search modes - Boolean/Phrase | 3,710   |
| S60 | (MH "Case Management")                                                                                                                                                                                                   | Search modes - Boolean/Phrase | 13,403  |
| S59 | (MH "Multidisciplinary Care Team")                                                                                                                                                                                       | Search modes - Boolean/Phrase | 28,529  |
| S58 | (MH "Consumer Participation")                                                                                                                                                                                            | Search modes - Boolean/Phrase | 12,214  |
| S57 | (MH "Primary Health Care")                                                                                                                                                                                               | Search modes - Boolean/Phrase | 38,581  |
| S56 | (MH "Community Health Services")                                                                                                                                                                                         | Search modes - Boolean/Phrase | 13,940  |
| S55 | S53 OR S54                                                                                                                                                                                                               | Search modes - Boolean/Phrase | 903,092 |
| S54 | ((seek or seeks or seeking) n3 (help* or treatment* or care))                                                                                                                                                            | Search modes - Boolean/Phrase | 13,303  |
| S53 | (barrier* or hurdle* or obstacle* or challeng* or incentiv* or obstruct* or refusal* or impedim* or promot* or facilitat* or support* or enabl* or cause* or reason* or encourag* or predict* or hinder* or willingness) | Search modes - Boolean/Phrase | 897,161 |
| S52 | S45 AND S51                                                                                                                                                                                                              | Search modes - Boolean/Phrase | 240     |
| S51 | S46 OR S47 OR S48 OR S49 OR S50                                                                                                                                                                                          | Search modes - Boolean/Phrase | 112,403 |
| S50 | (coordinat* n3 (care or health care or healthcare or service* or treatment* or therap* or psychotherap* or program*))                                                                                                    | Search modes - Boolean/Phrase | 6,957   |
| S49 | (connect* n3 (care or health care or healthcare or service* or treatment* or therap* or psychotherap* or program*))                                                                                                      | Search modes - Boolean/Phrase | 2,263   |
| S48 | (integrat* n3 (care or health care or healthcare or service* or treatment* or therap* or psychotherap* or program*))                                                                                                     | Search modes - Boolean/Phrase | 19,214  |
| S47 | ((vertical or horizontal or integrat* or coordinat* or co-ordinat* or link*) and (care or health care or healthcare or service* or treatment* or therap* or psychotherap* or program*))                                  | Search modes - Boolean/Phrase | 110,503 |
| S46 | (MH "Health Care Delivery, Integrated")                                                                                                                                                                                  | Search modes - Boolean/Phrase | 6,478   |
| S45 | S19 OR S44                                                                                                                                                                                                               | Search modes - Boolean/Phrase | 4,356   |
| S44 | S12 AND S43                                                                                                                                                                                                              | Search modes - Boolean/Phrase | 3,562   |
| S43 | S20 OR S21 OR S22 OR S23 OR S24 OR S25 OR S26 OR S27 OR S28 OR S29 OR S30 OR S31 OR S32 OR S33 OR S34 OR S35 OR S36 OR S37 OR S38 OR S39 OR S40 OR S41 OR S42                                                            | Search modes - Boolean/Phrase | 295,552 |
| S42 | hoard*                                                                                                                                                                                                                   | Search modes - Boolean/Phrase | 279     |

|     |                                                                                                                                                                                                                                                                                     |                               |         |
|-----|-------------------------------------------------------------------------------------------------------------------------------------------------------------------------------------------------------------------------------------------------------------------------------------|-------------------------------|---------|
| S41 | attention deficit                                                                                                                                                                                                                                                                   | Search modes - Boolean/Phrase | 8,798   |
| S40 | conduct disorder*                                                                                                                                                                                                                                                                   | Search modes - Boolean/Phrase | 762     |
| S39 | bipolar                                                                                                                                                                                                                                                                             | Search modes - Boolean/Phrase | 7,852   |
| S38 | Schizophreni*                                                                                                                                                                                                                                                                       | Search modes - Boolean/Phrase | 13,979  |
| S37 | ((depression* or depressed or depressiv* or MDD)                                                                                                                                                                                                                                    | Search modes - Boolean/Phrase | 92,716  |
| S36 | obsessive compulsive                                                                                                                                                                                                                                                                | Search modes - Boolean/Phrase | 2,839   |
| S35 | post-traumatic stress disorder*                                                                                                                                                                                                                                                     | Search modes - Boolean/Phrase | 2,651   |
| S34 | PTSD                                                                                                                                                                                                                                                                                | Search modes - Boolean/Phrase | 4,813   |
| S33 | anxiety                                                                                                                                                                                                                                                                             | Search modes - Boolean/Phrase | 48,239  |
| S32 | ((mental or psych*) n1 (health* or illness* or disease* or condition* or disorder*))                                                                                                                                                                                                | Search modes - Boolean/Phrase | 150,733 |
| S31 | (MH "Stress Disorders, Post-Traumatic")                                                                                                                                                                                                                                             | Search modes - Boolean/Phrase | 11,557  |
| S30 | (MH "Attention Deficit Hyperactivity Disorder") OR (MH "Mental Disorders Diagnosed in Childhood") OR (MH "Child Behavior Disorders+") OR (MH "Child Development Disorders+") OR (MH "Child Development Disorders, Pervasive+") OR (MH "Feeding and Eating Disorders of Childhood+") | Search modes - Boolean/Phrase | 28,519  |
| S29 | (MH "Separation Anxiety")                                                                                                                                                                                                                                                           | Search modes - Boolean/Phrase | 382     |
| S28 | (MH "Depression+")                                                                                                                                                                                                                                                                  | Search modes - Boolean/Phrase | 59,957  |
| S27 | (MH "Affective Disorders+")                                                                                                                                                                                                                                                         | Search modes - Boolean/Phrase | 63,151  |
| S26 | (MH "Eating Disorders+")                                                                                                                                                                                                                                                            | Search modes - Boolean/Phrase | 11,050  |
| S25 | (MH "Dissociative Disorders+")                                                                                                                                                                                                                                                      | Search modes - Boolean/Phrase | 665     |
| S24 | (MH "Personality Disorders+")                                                                                                                                                                                                                                                       | Search modes - Boolean/Phrase | 6,356   |
| S23 | (MH "Affective Disorders, Psychotic+") OR (MH "Psychotic Disorders") OR (MH "Schizoaffective Disorder") OR (MH "Schizophrenia+")                                                                                                                                                    | Search modes - Boolean/Phrase | 19,775  |
| S22 | (MH "Anxiety Disorders+")                                                                                                                                                                                                                                                           | Search modes - Boolean/Phrase | 21,620  |
| S21 | (MH "Mental Disorders")                                                                                                                                                                                                                                                             | Search modes - Boolean/Phrase | 33,506  |
| S20 | (MH "Mental Health")                                                                                                                                                                                                                                                                | Search modes - Boolean/Phrase | 18,412  |
| S19 | S12 AND S18                                                                                                                                                                                                                                                                         | Search modes - Boolean/Phrase | 1,098   |
| S18 | S13 OR S14 OR S15 OR S16 OR S17                                                                                                                                                                                                                                                     | Search modes - Boolean/Phrase | 122,473 |
| S17 | alcoholi* or drinker* or drinking                                                                                                                                                                                                                                                   | Search modes - Boolean/Phrase | 37,825  |
| S16 | (gamble* or gambling*)                                                                                                                                                                                                                                                              | Search modes - Boolean/Phrase | 1,914   |
| S15 | ((drug or substance* or alcohol or opioid* or amphetamine* or cocaine or marijuana or cannabis or phencyclidine or benzodiaz*) n2 (misuse or abuse* or addict* or depend*))                                                                                                         | Search modes - Boolean/Phrase | 56,272  |
| S14 | (MH "Gambling")                                                                                                                                                                                                                                                                     | Search modes - Boolean/Phrase | 1,265   |
| S13 | (MH "Substance Use Disorders+")                                                                                                                                                                                                                                                     | Search modes - Boolean/Phrase | 93,525  |
| S12 | S1 OR S2 OR S3 OR S4 OR S5 OR S6 OR S7 OR S8 OR S9 OR S10 OR S11                                                                                                                                                                                                                    | Search modes - Boolean/Phrase | 41,008  |
| S11 | shaken baby                                                                                                                                                                                                                                                                         | Search modes - Boolean/Phrase | 392     |
| S10 | ((brain* or cerebr* or intracerebr* or crani* or intracran* or head* or subdural* or epidural* or extradural*) n1 (haematoma* or hematoma* or hemorrhag* or haemorrhag*))                                                                                                           | Search modes - Boolean/Phrase | 9,061   |

|    |                                                                                                                                       |                               |        |
|----|---------------------------------------------------------------------------------------------------------------------------------------|-------------------------------|--------|
| S9 | ((brain or head* or cerebr* or crani* or skull* or intracran*) n2 (injur* or trauma* or damag* or wound* or fracture* or contusion*)) | Search modes - Boolean/Phrase | 30,635 |
| S8 | postconcuss*                                                                                                                          | Search modes - Boolean/Phrase | 741    |
| S7 | concuss*                                                                                                                              | Search modes - Boolean/Phrase | 3,360  |
| S6 | wrTBI*                                                                                                                                | Search modes - Boolean/Phrase | 7      |
| S5 | mTBI*                                                                                                                                 | Search modes - Boolean/Phrase | 614    |
| S4 | TBI*                                                                                                                                  | Search modes - Boolean/Phrase | 5,222  |
| S3 | (MH "Head Injuries")                                                                                                                  | Search modes - Boolean/Phrase | 4,698  |
| S2 | (MH "Brain Concussion+")                                                                                                              | Search modes - Boolean/Phrase | 2,888  |
| S1 | (MH "Brain Injuries+")                                                                                                                | Search modes - Boolean/Phrase | 18,914 |

#### Database: Sociological Abstracts

(noft(tbi\* OR mtbi\* OR concuss\* OR postconcuss\* OR "shaken baby") OR noft(((brain OR head\* OR cerebr\* OR crani\* OR skull\* OR intracran\*) NEAR/2 (injur\* OR trauma\* OR damag\* OR wound\* OR fracture\* OR contusion\*)))) AND (noft(((drug OR substance? OR alcohol OR opioid? OR amphetamine? OR cocaine OR marijuana OR cannabis OR phencyclidine OR benzodiaz\*) NEAR/2 (misuse OR abuse\* OR addict\* OR depend\*))) OR noft(gambli???) OR noft((alcoholi\* OR drinker\* OR drinking)) OR noft(((mental OR psych\*) NEAR/1 (health\* OR illness\* OR disease\* OR condition\* OR disorder?))) OR noft(anxiety OR PTSD OR "post-traumatic stress" OR "obsessive compulsive" OR depression? OR depressed OR depressiv\* OR MDD OR Schizophreni\* OR "attention deficit" OR hoard\*) OR noft("conduct disorder" OR "conduct disorders"))

#### Limits applied

- Language: English
- Exclude: Books; Magazines

#### Database: ProQuest Dissertations & Theses Global

((noft(tbi\* OR mtbi\* OR concuss\* OR postconcuss\* OR "shaken baby") OR noft(((brain OR head\* OR cerebr\* OR crani\* OR skull\* OR intracran\*) NEAR/2 (injur\* OR trauma\* OR damag\* OR wound\* OR fracture\* OR contusion\*)))) AND (noft(((drug OR substance? OR alcohol OR opioid? OR amphetamine? OR cocaine OR marijuana OR cannabis OR phencyclidine OR benzodiaz\*) NEAR/2 (misuse OR abuse\* OR addict\* OR depend\*))) OR

1  
 2  
 3 noft(gambl???) OR noft((alcoholi\* OR drinker\* OR drinking)) OR noft(((mental OR psych\*)  
 4 NEAR/1 (health\* OR illness\* OR disease\* OR condition\* OR disorder?))) OR noft(anxiety OR  
 5 PTSD OR "post-traumatic stress" OR "obsessive compulsive" OR depression? OR  
 6 depressed OR depressiv\* OR MDD OR Schizophreni\* OR "attention deficit" OR hoard\*) OR  
 7 noft("conduct disorder" OR "conduct disorders")) AND ((noft(barrier\* OR hurdle\* OR  
 8 obstacle\* OR challeng\* OR incentiv\* OR obstruct\* OR refusal\* OR impedim\* OR promot\* OR  
 9 facilitat\* OR support\* OR enabl\* OR cause\* OR reason\* OR encourag\* OR predict\* OR  
 10 hinder\* OR willingness) OR noft(seek\* NEAR/3 help\*) OR noft(seek\* NEAR/3 treatment\*)  
 11 OR noft(seek\* NEAR/3 care)) AND (noft((interdisciplin\* OR inter-disciplin\* OR  
 12 interprofession\* OR inter-profession\* OR multidisciplin\* OR multi-disciplin\* OR  
 13 multiprofession\* OR multi-profession\*)) OR noft(engagement OR engage OR engaging OR  
 14 empower\* OR participat\*) OR noft(governan\* OR accountab\*) OR noft(model NEAR/2 care)  
 15 OR noft(educat\* OR screen\* OR train\* OR transition\* OR evaluat\* OR coordinat\*)) OR  
 16 (((noft(tbi\* OR mtbi\* OR concuss\* OR postconcuss\* OR "shaken baby") OR noft(((brain OR  
 17 head\* OR cerebr\* OR crani\* OR skull\* OR intracran\*) NEAR/2 (injur\* OR trauma\* OR  
 18 damag\* OR wound\* OR fracture\* OR contusion\*)))) AND (noft(((drug OR substance? OR  
 19 alcohol OR opioid? OR amphetamine? OR cocaine OR marijuana OR cannabis OR  
 20 phencyclidine OR benzodiaz\*) NEAR/2 (misuse OR abuse\* OR addict\* OR depend\*))) OR  
 21 noft(gambl???) OR noft((alcoholi\* OR drinker\* OR drinking)) OR noft(((mental OR psych\*)  
 22 NEAR/1 (health\* OR illness\* OR disease\* OR condition\* OR disorder?))) OR noft(anxiety OR  
 23 PTSD OR "post-traumatic stress" OR "obsessive compulsive" OR depression? OR  
 24 depressed OR depressiv\* OR MDD OR Schizophreni\* OR "attention deficit" OR hoard\*) OR  
 25 noft("conduct disorder" OR "conduct disorders")) AND ((noft((vertical OR horizontal OR  
 26 integrat\* OR coordinat\* OR co-ordinat\* OR link\*)) AND noft((care OR health care OR  
 27 healthcare OR service\* OR treatment\* OR therap\* OR psychotherap\* OR program\*)) OR  
 28 (noft((integrat\*) NEAR/3 (care)) OR noft((integrat\*) NEAR/3 ("health care")) OR  
 29 noft((integrat\*) NEAR/3 (healthcare)) OR noft((integrat\*) NEAR/3 (healthcare)) OR  
 30 noft((integrat\*) NEAR/3 (service\*)) OR noft((integrat\*) NEAR/3 (treatment\*)) OR  
 31 noft((integrat\*) NEAR/3 (therap\*)) OR noft((integrat\*) NEAR/3 (psychotherap\*)) OR  
 32 noft((integrat\*) NEAR/3 (program\*)) OR noft((coordinat\*) NEAR/3 (care)) OR  
 33 noft((coordinat\*) NEAR/3 ("health care")) OR noft((coordinat\*) NEAR/3 (healthcare)) OR  
 34 noft((coordinat\*) NEAR/3 (healthcare)) OR noft((coordinat\*) NEAR/3 (service\*)) OR  
 35 noft((coordinat\*) NEAR/3 (treatment\*)) OR noft((coordinat\*) NEAR/3 (therap\*)) OR  
 36 noft((coordinat\*) NEAR/3 (psychotherap\*)) OR noft((coordinat\*) NEAR/3 (program\*)) OR  
 37 noft((connect\*) NEAR/3 (care)) OR noft((connect\*) NEAR/3 ("health care")) OR  
 38  
 39  
 40  
 41  
 42  
 43  
 44  
 45  
 46  
 47  
 48  
 49  
 50  
 51  
 52  
 53  
 54  
 55  
 56  
 57  
 58  
 59  
 60

1  
2  
3 noft((connect\*) NEAR/3 (healthcare)) OR noft((connect\*) NEAR/3 (healthcare)) OR  
4 noft((connect\*) NEAR/3 (service\*)) OR noft((connect\*) NEAR/3 (treatment\*)) OR  
5 noft((connect\*) NEAR/3 (therap\*)) OR noft((connect\*) NEAR/3 (psychotherap\*)) OR  
6 noft((connect\*) NEAR/3 (program\*))))Limits applied  
7  
8  
9

10  
11 Limits applied:

- 12 • Language: English
- 13  
14  
15  
16  
17  
18  
19  
20  
21  
22  
23  
24  
25  
26  
27  
28  
29  
30  
31  
32  
33  
34  
35  
36  
37  
38  
39  
40  
41  
42  
43  
44  
45  
46  
47  
48  
49  
50  
51  
52  
53  
54  
55  
56  
57  
58  
59  
60

**PRISMA-P (Preferred Reporting Items for Systematic review and Meta-Analysis Protocols) 2015 checklist: recommended items to address in a systematic review protocol\***

| Section and topic                 | Item No | Checklist item                                                                                                                                                                                                                            |
|-----------------------------------|---------|-------------------------------------------------------------------------------------------------------------------------------------------------------------------------------------------------------------------------------------------|
| <b>ADMINISTRATIVE INFORMATION</b> |         |                                                                                                                                                                                                                                           |
| Title:                            |         |                                                                                                                                                                                                                                           |
| Identification                    | 1a      | Identify the report as a protocol of a systematic review (PAGE 1)                                                                                                                                                                         |
| Update                            | 1b      | If the protocol is for an update of a previous systematic review, identify as such (N/A)                                                                                                                                                  |
| Registration                      | 2       | If registered, provide the name of the registry (such as PROSPERO) and registration number (PAGE 2)                                                                                                                                       |
| Authors:                          |         |                                                                                                                                                                                                                                           |
| Contact                           | 3a      | Provide name, institutional affiliation, e-mail address of all protocol authors; provide physical mailing address of corresponding author (PAGE 1)                                                                                        |
| Contributions                     | 3b      | Describe contributions of protocol authors and identify the guarantor of the review (PAGE 8)                                                                                                                                              |
| Amendments                        | 4       | If the protocol represents an amendment of a previously completed or published protocol, identify as such and list changes; otherwise, state plan for documenting important protocol amendments (N/A)                                     |
| Support:                          |         |                                                                                                                                                                                                                                           |
| Sources                           | 5a      | Indicate sources of financial or other support for the review (PAGE 8)                                                                                                                                                                    |
| Sponsor                           | 5b      | Provide name for the review funder and/or sponsor (PAGE 8)                                                                                                                                                                                |
| Role of sponsor or funder         | 5c      | Describe roles of funder(s), sponsor(s), and/or institution(s), if any, in developing the protocol (PAGE 8)                                                                                                                               |
| <b>INTRODUCTION</b>               |         |                                                                                                                                                                                                                                           |
| Rationale                         | 6       | Describe the rationale for the review in the context of what is already known (PAGE 4)                                                                                                                                                    |
| Objectives                        | 7       | Provide an explicit statement of the question(s) the review will address with reference to participants, interventions, comparators, and outcomes (PICO) (PAGE 4)                                                                         |
| <b>METHODS</b>                    |         |                                                                                                                                                                                                                                           |
| Eligibility criteria              | 8       | Specify the study characteristics (such as PICO, study design, setting, time frame) and report characteristics (such as years considered, language, publication status) to be used as criteria for eligibility for the review (PAGES 5-6) |
| Information sources               | 9       | Describe all intended information sources (such as electronic databases, contact with study authors, trial registers or other grey literature sources) with planned dates of coverage (PAGES 5)                                           |
| Search strategy                   | 10      | Present draft of search strategy to be used for at least one electronic database, including planned limits, such that it could be repeated (PAGE 5)                                                                                       |
| Study records:                    |         |                                                                                                                                                                                                                                           |
| Data management                   | 11a     | Describe the mechanism(s) that will be used to manage records and data throughout the review (PAGE 5)                                                                                                                                     |

|                                    |     |                                                                                                                                                                                                                                                        |
|------------------------------------|-----|--------------------------------------------------------------------------------------------------------------------------------------------------------------------------------------------------------------------------------------------------------|
| Selection process                  | 11b | State the process that will be used for selecting studies (such as two independent reviewers) through each phase of the review (that is, screening, eligibility and inclusion in meta-analysis) (PAGE 5-6)                                             |
| Data collection process            | 11c | Describe planned method of extracting data from reports (such as piloting forms, done independently, in duplicate), any processes for obtaining and confirming data from investigators (PAGE 6)                                                        |
| Data items                         | 12  | List and define all variables for which data will be sought (such as PICO items, funding sources), any pre-planned data assumptions and simplifications (PAGE 6)                                                                                       |
| Outcomes and prioritization        | 13  | List and define all outcomes for which data will be sought, including prioritization of main and additional outcomes, with rationale (PAGE 5-6)                                                                                                        |
| Risk of bias in individual studies | 14  | Describe anticipated methods for assessing risk of bias of individual studies, including whether this will be done at the outcome or study level, or both; state how this information will be used in data synthesis (PAGE 6)                          |
| Data synthesis                     | 15a | Describe criteria under which study data will be quantitatively synthesised (N/A)                                                                                                                                                                      |
|                                    | 15b | If data are appropriate for quantitative synthesis, describe planned summary measures, methods of handling data and methods of combining data from studies, including any planned exploration of consistency (such as $I^2$ , Kendall's $\tau$ ) (N/A) |
|                                    | 15c | Describe any proposed additional analyses (such as sensitivity or subgroup analyses, meta-regression) (PAGE 7)                                                                                                                                         |
|                                    | 15d | If quantitative synthesis is not appropriate, describe the type of summary planned (PAGE 7)                                                                                                                                                            |
| Meta-bias(es)                      | 16  | Specify any planned assessment of meta-bias(es) (such as publication bias across studies, selective reporting within studies) (N/A)                                                                                                                    |
| Confidence in cumulative evidence  | 17  | Describe how the strength of the body of evidence will be assessed (such as GRADE) (PAGE 6)                                                                                                                                                            |

**\* It is strongly recommended that this checklist be read in conjunction with the PRISMA-P Explanation and Elaboration (cite when available) for important clarification on the items. Amendments to a review protocol should be tracked and dated. The copyright for PRISMA-P (including checklist) is held by the PRISMA-P Group and is distributed under a Creative Commons Attribution Licence 4.0.**

*From: Shamseer L, Moher D, Clarke M, Ghersi D, Liberati A, Petticrew M, Shekelle P, Stewart L, PRISMA-P Group. Preferred reporting items for systematic review and meta-analysis protocols (PRISMA-P) 2015: elaboration and explanation. BMJ. 2015 Jan 2;349(jan02 1):g7647.*



# BMJ Open

## A systematic review protocol for facilitators and barriers to integrating health services for traumatic brain injury and mental health or addictions

|                                 |                                                                                                                                                                                                                       |
|---------------------------------|-----------------------------------------------------------------------------------------------------------------------------------------------------------------------------------------------------------------------|
| Journal:                        | <i>BMJ Open</i>                                                                                                                                                                                                       |
| Manuscript ID                   | bmjopen-2018-027534.R1                                                                                                                                                                                                |
| Article Type:                   | Protocol                                                                                                                                                                                                              |
| Date Submitted by the Author:   | 11-Jun-2019                                                                                                                                                                                                           |
| Complete List of Authors:       | Chan , Vincy ; Toronto Rehabilitation Institute , Research Tocalino, Danielle; University of Toronto, Rehabilitation Science Institute<br>Colantonio, Angela; University of Toronto, Rehabilitation Science Institute |
| <b>Primary Subject Heading</b>: | Health services research                                                                                                                                                                                              |
| Secondary Subject Heading:      | Public health                                                                                                                                                                                                         |
| Keywords:                       | Neurological injury < NEUROLOGY, MENTAL HEALTH, Organisation of health services < HEALTH SERVICES ADMINISTRATION & MANAGEMENT, Integration of health services, Traumatic brain injury, Addictions                     |
|                                 |                                                                                                                                                                                                                       |

SCHOLARONE™  
Manuscripts

**A systematic review protocol for facilitators and barriers to integrating health services for traumatic brain injury and mental health or addictions**

Vincy Chan<sup>1</sup>, Danielle Toccalino<sup>2</sup>, Angela Colantonio<sup>1,2,3</sup>

Dr. Vincy Chan, PhD

[vincy.chan@uhn.ca](mailto:vincy.chan@uhn.ca)

KITE-Toronto Rehab, University Health Network, 550 University Avenue, Toronto, ON, M5G 2A2

Ms. Danielle Toccalino, MSc

[danielle.toccalino@mail.utoronto.ca](mailto:danielle.toccalino@mail.utoronto.ca)

University of Toronto, 500 University Avenue, Toronto, ON, M5G 1V7

Dr. Angela Colantonio, PhD, O.T. Reg., (Ont.), FCAHS, FACRM

[angela.colantonio@utoronto.ca](mailto:angela.colantonio@utoronto.ca)

KITE-Toronto Rehab, University Health Network

University of Toronto

Institute for Clinical Evaluative Sciences, 2075 Bayview Avenue, Toronto, ON, M4N 3M5

Corresponding Author:

Dr. Vincy Chan

KITE-Toronto Rehab, University Health Network

160-500 University Avenue

Toronto, Ontario

M5G 1V7

## Abstract

### Introduction

In the most populous province of Canada, one in five adults and one in six students report a lifetime history of traumatic brain injury (TBI). These individuals were also more likely to report elevated psychological distress and use illicit substances compared to those without TBI. The need for integrated health services has been recognized globally, yet efforts to develop more comprehensive and effective care for TBI and mental health and/or addictions (MHA) continue to be challenged by the siloing of the two systems. This protocol is for a systematic review that describes the current types of integrated care for TBI and MHA, and identifies the barriers and facilitators to integrating health care for these populations.

### Methods and Analyses

This review will systematically search MEDLINE, EMBASE, PsycINFO, CINAHL, Cochrane Central Register of Controlled Trials, Sociological Abstracts, and Dissertations and Theses Global. References of eligible articles will also be searched for additional relevant studies. The search strategy will include the use of text words and subject headings relevant to the concepts 'TBI', 'substance abuse, gambling, or mental health', 'integrated healthcare', 'barriers and facilitators', and 'healthcare access'. Two reviewers will independently screen all articles based on pre-determined inclusion and exclusion criteria, and perform quality assessment on eligible studies. A narrative synthesis will be conducted using the data abstracted by the two reviewers.

### Ethics and dissemination

Findings from the systematic review will be published in peer-reviewed journals, presented at scientific meetings, and summarized for key stakeholders in the field of TBI and/or MHA. This protocol will form a systematic review that holds the potential to impact policy and planning to develop integrated person-centred care for TBI and MHA, and addresses a recognized gap in TBI care.

### Registration

CRD42018108343

## Article Summary

### *Strengths and Limitations of this Study*

- The exclusion of non-English language studies, thereby omitting evidence on integrating TBI and MHA in jurisdictions where findings are not published in English, limits the comprehensiveness of the systematic review
- Recognizing not all studies will explicitly describe a policy, intervention, service delivery, or program as integrating TBI and MHA care, the primary search strategy (TBI, MHA, and integrated care) will be supplemented with an additional search that aims to capture articles describing barriers and facilitators to healthcare for TBI and MHA (TBI, MHA, barriers and facilitators, and healthcare access) to maximize the return of relevant articles
- At both screening stages, a random selection of articles will first be selected for independent review to enable the reviewers to meet and to establish and document a common extraction and interpretation technique; the reviewers will also meet regularly to review the articles that are included/excluded to ensure consistency in the interpretation of the pre-determined inclusion criteria

## **A systematic review protocol for facilitators and barriers to integrating health services for traumatic brain injury and mental health or addictions**

### **Introduction**

Traumatic brain injury (TBI) has been defined as “an alteration in brain function, or other evidence of brain pathology, caused by an external force”.<sup>1</sup> It is more common than breast cancer, HIV/AIDS, spinal cord injury, and multiple sclerosis combined,<sup>2-5</sup> and the indirect economic costs due to a TBI is projected to be \$8.2 billion by 2031 in Canada alone. This exceeds costs of other common neurological conditions, including epilepsy, multiple sclerosis, and dementias including Alzheimer’s.<sup>6</sup> In Ontario, Canada, home to 39% of Canadians,<sup>7</sup> one in six adults<sup>8</sup> and one in five students<sup>9</sup> report a lifetime history of TBI. These individuals were also at least 52% more likely to have elevated psychological distress,<sup>10</sup> 100% more likely to use cannabis,<sup>11</sup> 93% more likely to experience suicidal ideation,<sup>10</sup> and 239% more likely to have attempted suicide<sup>10</sup> compared to those without a history of TBI. Literature exploring the relationship between TBI and mental health and/or addictions (MHA) has found that MHA is prevalent after TBI across the lifespan, particularly diagnoses of schizophrenia, depression, anxiety, substance use disorder, post-traumatic stress disorder, obsessive-compulsive disorder (OCD), and attention deficit hyperactivity disorder (ADHD).<sup>12-22</sup> It is noteworthy that among individuals with a MHA, a history of TBI is also common.<sup>12-23</sup>

Despite these alarming statistics and the plethora of research establishing a relationship between TBI and MHA, a systems analysis of community and health services for TBI in Ontario identified a lack of appropriate services and community support for individuals with a TBI and MHA.<sup>24</sup> Efforts to develop more effective and early intervention and care continue to be challenged by the current siloing of the TBI and MHA systems. This need for integrated healthcare has been recognized globally<sup>25-26</sup> and across many health conditions and settings.<sup>27-32</sup> Most recently, the World Health Assembly adopted the “Framework on Integrated People-Centred Health Services”<sup>33</sup> with the vision that “all people have equal access to quality health services that are co-produced in a way that meets their life course needs and respects social preferences, are coordinated across the continuum of care, and are comprehensive, safe, effective, timely, efficient and acceptable; and all carers are motivated, skilled and operate in a supportive environment”.<sup>33</sup> Such integrated care is attractive, as it holds the potential to enable the health systems to provide care that addresses the priorities and needs of persons with lived experience, and improve their experiences in transitions across their continuum of care, to positively impact patient outcome and quality of life.

Building on this vision, this protocol is for a systematic review that (1) describes the current types of integrated care for TBI and MHA, including access to MHA services for the TBI population and access to TBI services for the MHA population, and (2) identifies the barriers and facilitators to integrating health services for individuals with TBI and MHA. It is recognized that there are numerous concepts and definitions of integration that is currently applied in the literature,<sup>33-34</sup> as many factors impact the delivery of health services in any given setting,<sup>34-35</sup> making it difficult to identify one definition of health service integration. As such, this protocol will form a systematic review that aims to identify all forms of integration of care (e.g., vertical, horizontal, clinical, functional integration) to inform policy and programs to develop integrated care for TBI and MHA.

### **Methods and Analysis**

### Search Strategy

The following databases will be searched for relevant articles:

1. MEDLINE In-Process and Other Non-Indexed Citations and MEDLINE;
2. EMBASE;
3. PsycINFO;
4. CINAHL;
5. Cochrane Central Register of Controlled Trials;
6. Sociological Abstracts; and
7. Dissertations & Theses Global.

The search strategy for this protocol is available through the online supplementary additional file 1. This search strategy will include the use of text words and subject headings (e.g., MeSH, Emtree) related to the following concepts:

- A. TBI;
- B. Substance abuse, gambling, or mental health;
- C. Integrated healthcare;
- D. Barrier and facilitator; and
- E. Healthcare access.

The primary search strategy (concepts A + B + C) will identify papers that discuss integrated healthcare in a population with TBI and MHA. To complement this primary search strategy, an additional search (concepts A + B + D + E) will be included, based on the search strategies of other published reviews<sup>27 31 32 36-38</sup> and the “Framework on Integrated People-Centred Health Services”, adopted by the World Health Organization in 2016.<sup>33</sup> These two searches will be combined with an “OR” statement to complete the strategy for each of the databases searched, with the exception of the database Sociological Abstracts, where the strategy will be reduced (concepts A + B) due to paucity of results.

Searches will be limited to English language publications and exclude animal studies when possible. Additional limits and search fields will be applied, when applicable, to exclude conference abstracts, magazines, books, and encyclopedias. Records returned from this search strategy will be managed in EndNote.

### Study Selection

For all databases, a first screen will be conducted by two reviewers who will independently assess all titles and abstracts for eligibility based on pre-determined inclusion criteria:

1. Describe or evaluate a (a) policy, (b) program, or (c) intervention/treatment at the health service delivery level for individuals with TBI and/or MHA identified in the literature to be prevalent among the TBI population (addictions/substance use, problem gambling, mood and personality disorders, schizophrenia and psychosis, anxiety and depression, trauma and stress disorder, OCD, ADHD, conduct disorder);<sup>12-23</sup> OR
2. Screen or diagnosis for a TBI in a health service for MHA; OR
3. Screen or diagnosis for a MHA in a health service for TBI; AND
4. Quantitative, qualitative, or mixed method studies, or review papers that report primary research findings related to TBI and/or MHA care; AND

1  
2  
3 5. Full-text available.  
4

5 Articles that meet all of the above criteria will be included for the second screen, which will be a full-text  
6 screen. However, articles that are narrative, commentaries, or describe a theory or framework, and articles  
7 that look at the broader brain injury population (e.g., acquired brain injury, trauma patients) without  
8 specific mention of TBI will be excluded.  
9

10 Recognizing that reviewers may interpret the above pre-determined inclusion criteria differently, a  
11 random selection of abstracts and titles will first be selected for independent review so the reviewers can  
12 meet to establish and document a common extraction and interpretation technique. The reviewers will  
13 then meet regularly to review the abstracts that are included/excluded to ensure consistency in the  
14 interpretation of the pre-determined inclusion criteria.  
15

16 Two reviewers will independently assess the full-text articles for fulfillment of the following pre-  
17 determined inclusion criteria:  
18

- 19 1. Describe or evaluate a (a) policy, (b) program, or (c) intervention/treatment at the health service  
20 delivery level for individuals with TBI and MHA of interest OR
- 21 2. Screen or diagnosis for a TBI in a health service for MHA; OR
- 22 3. Screen or diagnosis for a MHA in a health service for TBI; AND
- 23 4. Describe or evaluate an actual, applied experience of integration.  
24  
25

26 The reference lists of included full-text articles will also be hand-searched for additional relevant articles.  
27 The study selection process and the reasons for exclusions at the full-text level will be presented using the  
28 Preferred Reporting Items for Systematic Reviews and Meta-Analyses (PRISMA) study flow diagram.  
29 Similar to the title and abstract screen, the reviewers will first review a random selection of articles to  
30 establish a common extraction and interpretation technique, and will meet regularly to ensure consistency  
31 in the interpretation of the inclusion criteria.  
32  
33  
34

35 *Data Extraction*  
36

37 The following data will be abstracted independently by two reviewers, with the goal of extracting  
38 standardized information that describes the context of the integration activity and associated barriers and  
39 facilitators:  
40

- 41 1. Author and publication year
- 42 2. Country of study
- 43 3. Funding source (potential conflict of interest from funding? Y/N)
- 44 4. Research objective(s)
- 45 5. Study design
- 46 6. Overall and sex/gender specific participant characteristics and sample size – e.g.,  
47 sociodemographics (age, race/ethnicity, and other SES), TBI (Y/N, severity, cause of injury, time  
48 since injury), MHA (Y/N – specify condition(s), time since diagnosis), comorbidities
- 49 7. Description of integration activity
- 50 8. Results of integration activity (stratify by sex/gender, if available)
- 51 9. Barriers (stratify by sex/gender, if available)
- 52 10. Facilitators (stratify by sex/gender, if available)
- 53 11. Additional comments/notes from reviewers  
54  
55  
56  
57  
58  
59  
60

1  
2  
3 Similar to the study selection process, the reviewers will first conduct data extraction on a select articles  
4 to establish a common interpretation and extraction technique, and will meet regularly to ensure  
5 consistency in the data extracted.  
6  
7

### 8 9 *Quality Assessment*

10 Controlled intervention, observational cohort and cross-sectional, case-control, before-after (pre-post)  
11 with no control group, and case series studies as well as systematic reviews and meta-analyses will be  
12 assessed using quality assessment tools created specifically for each study design by the methodologists  
13 from the National Institutes of Health and Research Triangle Institute International.<sup>39</sup> Qualitative studies  
14 will be assessed using the *Critical Appraisal Skills Programme (CASP)* checklist.<sup>40</sup> Two reviewers will  
15 independently assess each article that passes the full-text screen. In the case of rating discrepancies,  
16 reviewers will either come to a consensus or a third, independent reviewer will evaluate the study and  
17 resolve any disagreements.  
18  
19

### 20 21 22 *Data Synthesis*

23  
24 A narrative synthesis will be conducted using tools and techniques informed by the *Guidance on the*  
25 *Conduct of Narrative Synthesis in Systematic Reviews*.<sup>41</sup> The extracted data elements described above and  
26 results from the quality assessment will be “tabulated”. Where data are available, the extracted data  
27 elements will be tabulated by sex (if the original study examined sex as it relates to the biological  
28 attributes associated with “physical and physiological features including chromosomes, gene expression,  
29 hormone levels and functions, and reproductive/sexual anatomy”)<sup>42</sup> and gender (if the original study  
30 examined and intended to assess “the constructed roles, behaviours, expressions, and identifies of girls,  
31 women, boys, men, and gender diverse people”).<sup>42</sup> These findings will be “grouped and clustered” into  
32 the five recommended strategies of the “Framework on Integrated Person-Centred Care”<sup>33</sup> and, where  
33 applicable, type/context of integrated care/activity. Finally, a “textual description” will summarize each  
34 included study, focusing on the type of integrated care/activity as it relates to the recommended strategies  
35 of the Framework, and associated sex/gender specific barriers and facilitators.  
36  
37  
38  
39

### 40 41 *Patient and Public Involvement*

42 Patients and public were not involved in the creation of this systematic review protocol.  
43

44 However, this work is part of a larger program of research entitled ‘Integrating Brain Injury, Mental  
45 Health, and Addiction’, funded by the Ontario Ministry of Health and Long-Term Care, that received  
46 input from individuals with lived experience and representatives of organizations that serve the TBI,  
47 MHA, housing, criminal justice, and violence against women sectors.  
48  
49

### 50 51 **Ethics and Dissemination**

52  
53 Ethics review will not be required because only publicly available published data will be analyzed.  
54 Findings from the systematic review will be published in a peer-reviewed journal, presented at scientific  
55  
56  
57  
58



meetings, and summarized for stakeholders of the ‘Integrating Brain Injury, Mental Health, and Addictions Research Program’, funded by the Ontario Ministry of Health and Long-Term Care.<sup>43</sup>

### Strengths and Limitations

It is recognized that a major limitation of this systematic review is the exclusion of non-English language studies. Evidence on integrating TBI and MHA in jurisdictions where English is not a primary language may be missed, limiting the comprehensiveness of this systematic review. Of note is that unpublished results will not be identified in our systematic review, further limiting the comprehensiveness of this review. Recognizing the value of results of integrated activities that are not published in peer-reviewed journals, this protocol includes the process to systematically identify reports and theses to maximize the capture of findings related to integrated care for the TBI and MHA populations.

However, there are numerous strengths of this review, including those that aim to maximize the retrieval and inclusion of relevant data. The primary search strategy for this review will be supplemented with a secondary search, aimed to capture articles that describe integrations of healthcare but do not describe their study as such. This was added, recognizing that some non-specific treatments and interventions, such as screening for a TBI among individuals with MHA, may not be described as a form of integration and would be missed in the primary search. This additional search will ensure that non-specific treatments and integrated care are captured in this review. Similarly, the title and abstract screen will be purposely broad to include articles that describe policy, programs, or interventions/treatments for individuals with TBI and/or MHA, recognizing that many abstracts may focus on describing data primarily for only the TBI or MHA populations. Including these articles for the full-text screen will reduce the risk of missing relevant articles that describe their study predominantly from the perspective of TBI or MHA. Finally, theses will also be searched to capture early work, such as pilots, of integrated care for TBI and MHA that may not be published in peer-reviewed journals.

To the best of our knowledge, this is the first protocol for a systematic review that describes the types of integrated care for TBI and MHA currently implemented, and identifies the barriers and facilitators to integrating care for this population. Informed by the internationally adopted *Framework on Integrated Person-Centred Health Services*,<sup>33</sup> findings hold the potential to impact policy and planning for integrated care for TBI and MHA, and address a recognized gap in TBI care.

### Acknowledgements

The authors would like to acknowledge the support of Ms. Jessica Babineau, Information Specialist at the Toronto Rehabilitation Institute-University Health Network, for assistance in developing the search strategy, and Dr. Tatyana Mollayeva for assistance in identifying appropriate quality appraisal tools for this review.

### Author’s Contributions

VC conceptualized the study, formulated the design, and drafted the manuscript. VC and DT collaborated with JB (Information Specialist) to develop the search strategy. DT and AC critically reviewed the manuscript, and all authors read and approved the final manuscript.

1  
2  
3  
4  
5  
6  
7  
8  
9  
10  
11  
12  
13  
14  
15  
16  
17  
18  
19  
20  
21  
22  
23  
24  
25  
26  
27  
28  
29  
30  
31  
32  
33  
34  
35  
36  
37  
38  
39  
40  
41  
42  
43  
44  
45  
46  
47  
48  
49  
50  
51  
52  
53  
54  
55  
56  
57  
58  
59  
60

**Funding Statement**

This study was conducted as part of the 2017/18 Health System Research Fund Program Awards. ‘Integrating Brain Injury, Mental Health, and Addictions’. Ministry Grant #267.

**Competing Interests**

None declared

For peer review only

## References

1. Menon DK, Schwab K, Wright DW, et al. Position statement: definition of traumatic brain injury. *Arch Phys Med Rehabil* 2010;91(11):1637-40. doi: 10.1016/j.apmr.2010.05.017 [published Online First: 2010/11/04]
2. Challacombe L. The Epidemiology of HIV in Canada <https://www.catie.ca/factsheets/epidemiology/epidemiology-hiv-canada>: CATIE; 2018 [accessed September 11 2018].
3. Ontario CC. Ontario Cancer Statistics 2018. Toronto, Ontario: Cancer Care Ontario, 2018:172.
4. Noonan VK, Fingas M, Farry A, et al. Incidence and prevalence of spinal cord injury in Canada: a national perspective. *Neuroepidemiology* 2012;38(4):219-26. doi: 10.1159/000336014 [published Online First: 2012/05/05]
5. Gilmour H, Ramage-Morin PL, Wong SL. Multiple sclerosis: Prevalence and impact. Health Reports: Statistics Canada, 2018:3-8.
6. Mapping Connections: An understanding of neurological conditions in Canada. The National Population Health Study of Neurological Conditions. <https://www.canada.ca/en/public-health/services/reports-publications/mapping-connections-understanding-neurological-conditions.html>: A partnership between Neurological Health Charities Canada, The Public Health Agency of Canada, Health Canada and The Canadian Institutes of Health Research, 2014.
7. Canada S. Table 17-10-0005-01 Population estimates on July 1st, by age and sex <https://www150.statcan.gc.ca/t1/tbl1/en/cv.action?pid=1710000501>: Statistics Canada; 2018 [accessed September 11 2018].
8. Ilie G, Adlaf EM, Mann RE, et al. Associations between a History of Traumatic Brain Injuries and Current Cigarette Smoking, Substance Use, and Elevated Psychological Distress in a Population Sample of Canadian Adults. *J Neurotrauma* 2015;32(14):1130-4. doi: 10.1089/neu.2014.3619 [published Online First: 2014/12/17]
9. Ilie G, Boak A, Adlaf EM, et al. Prevalence and correlates of traumatic brain injuries among adolescents. *JAMA* 2013;309(24):2550-52. doi: 10.1001/jama.2013.6750
10. Ilie G, Mann RE, Boak A, et al. Suicidality, bullying and other conduct and mental health correlates of traumatic brain injury in adolescents. *PLoS One* 2014;9(4):e94936. doi: 10.1371/journal.pone.0094936 [published Online First: 2014/04/17]
11. Ilie G, Mann RE, Hamilton H, et al. Substance Use and Related Harms Among Adolescents With and Without Traumatic Brain Injury. *J Head Trauma Rehabil* 2015;30(5):293-301. doi: 10.1097/HTR.000000000000101 [published Online First: 2014/11/27]
12. Adeyemo BO, Biederman J, Zafonte R, et al. Mild Traumatic Brain Injury and ADHD: A Systematic Review of the Literature and Meta-Analysis. *J Atten Disord* 2014;18(7):576-84. doi: 10.1177/1087054714543371
13. Whelan-Goodinson R, Ponsford J, Johnston L, et al. Psychiatric Disorders Following Traumatic Brain Injury: Their Nature and Frequency. *J Head Trauma Rehabil* 2009;24(5):324-32. doi: 10.1097/HTR.0b013e3181a712aa
14. Max JE, Lansing AE, Koele SL, et al. Attention Deficit Hyperactivity Disorder in Children and Adolescents Following Traumatic Brain Injury. *Dev Neuropsychol* 2004;25(1-2): 159-77. doi: 10.1080/87565641.2004.9651926
15. Max JE, Wilde EA, D. BE, et al. Psychiatric Disorders After Pediatric Traumatic Brain Injury: A Prospective, Longitudinal, Controlled Study. *J Neuropsychiatry Clin Neurosci* 2012;24(4):427-36. doi: 10.1176/appi.neuropsych.12060149
16. Orlovska S, Pedersen MS, Benros ME, et al. Head Injury as Risk Factor for Psychiatric Disorders: A Nationwide Register-Based Follow-Up Study of 113,906 Persons With Head Injury. *Am J Psychiatry* 2014;171(4):463-69.

17. Schachar RJ, Park LS, Dennis M. Mental Health Implications of Traumatic Brain Injury (TBI) in Children and Youth. *J Can Acad Child Adolesc Psychiatry* 2015;24(2):100-8.
18. Bryant RA, O'Donnell ML, Creamer M, et al. The Psychiatric Sequelae of Traumatic Injury. *Am J Psychiatry* 2010;167(3):312-20.
19. Silver JM, Kramer R, Greenwald S, et al. The association between head injuries and psychiatric disorders: findings from the New Haven NIMH Epidemiologic Catchment Area Study. *Brain Inj* 2001;15(11):935-45. doi: 10.1080/02699050110065295 [published Online First: 2001/11/02]
20. Perry DC, Sturm VE, Peterson MJ, et al. Association of traumatic brain injury with subsequent neurological and psychiatric disease: a meta-analysis. *J Neurosurg* 2016;124(2):511-26. doi: 10.3171/2015.2.Jns14503
21. Massagli TL, Fann JR, Burington BE, et al. Psychiatric illness after mild traumatic brain injury in children11No commercial party having a direct financial interest in the results of the research supporting this article has or will confer a benefit on the author(s) or on any organization with which the author(s) is/are associated. *Arch Phys Med Rehab* 2004;85(9):1428-34. doi: <https://doi.org/10.1016/j.apmr.2003.12.036>
22. Gibson R, Purdy SC. Mental health disorders after traumatic brain injury in a New Zealand caseload. *Brain Inj* 2015;29(3):306-12. doi: 10.3109/02699052.2014.896471
23. Albicini M, Eggleston M, McKinlay A. The prevalence of traumatic brain injury, comorbid anxiety and other psychiatric disorders in an outpatient child and adolescent mental health service. *J Ment Health* 2017:1-7. doi: 10.1080/09638237.2017.1385733
24. Munce SE, Laan RV, Levy C, et al. Systems analysis of community and health services for acquired brain injury in Ontario, Canada. *Brain Inj* 2014;28(8):1042-51. doi: 10.3109/02699052.2014.890744 [published Online First: 2014/03/25]
25. Legido-Quigley H, Montgomery CM, Khan P, et al. Integrating tuberculosis and HIV services in low- and middle-income countries: a systematic review. *Trop Med Int Health* 2013;18(2):199-211. doi: 10.1111/tmi.12029 [published Online First: 2012/12/12]
26. Sigfrid L, Murphy G, Haldane V, et al. Integrating cervical cancer with HIV healthcare services: A systematic review. *PLoS One* 2017;12(7):e0181156. doi: 10.1371/journal.pone.0181156 [published Online First: 2017/07/22]
27. Atun R, de Jongh T, Secci F, et al. A systematic review of the evidence on integration of targeted health interventions into health systems. *Health Policy Plan* 2010;25(1):1-14. doi: 10.1093/heapol/czp053 [published Online First: 2009/12/05]
28. Chuah FLH, Haldane VE, Cervero-Liceras F, et al. Interventions and approaches to integrating HIV and mental health services: a systematic review. *Health Policy Plan* 2017;32(suppl\_4):iv27-iv47. doi: 10.1093/heapol/czw169 [published Online First: 2017/11/07]
29. Haldane V, Cervero-Liceras F, Chuah FL, et al. Integrating HIV and substance use services: a systematic review. *J Int AIDS Soc* 2017;20(1):21585. doi: 10.7448/IAS.20.1.21585 [published Online First: 2017/07/12]
30. Haldane V, Legido-Quigley H, Chuah FLH, et al. Integrating cardiovascular diseases, hypertension, and diabetes with HIV services: a systematic review. *AIDS Care* 2018;30(1):103-15. doi: 10.1080/09540121.2017.1344350 [published Online First: 2017/07/07]
31. Wakida EK, Akena D, Okello ES, et al. Barriers and facilitators to the integration of mental health services into primary health care: a systematic review protocol. *Syst Rev* 2017;6(1):171. doi: 10.1186/s13643-017-0561-0 [published Online First: 2017/08/27]
32. Watt N, Sigfrid L, Legido-Quigley H, et al. Health systems facilitators and barriers to the integration of HIV and chronic disease services: a systematic review. *Health Policy Plan* 2017;32(suppl\_4):iv13-iv26. doi: 10.1093/heapol/czw149 [published Online First: 2017/07/02]

- 1
- 2
- 3 33. Secretariat WHO. Framework on Integrated People-Centred Health Services. Geneva, Switzerland:  
4 World Health Organization, 2016.
- 5 34. Suter E, Oelke ND, Adair CE, et al. Health Systems Integration. Definitions, Processes & Impact: A  
6 Research Synthesis: Alberta Health Services, 2007.
- 7 35. Heyeres M, McCalman J, Tsey K, et al. The Complexity of Health Service Integration: A Review of  
8 Reviews. *Front Public Health* 2016;4:223. doi: 10.3389/fpubh.2016.00223 [published Online  
9 First: 2016/11/02]
- 10 36. Balogh R, McMorris CA, Lunsy Y, et al. Organising healthcare services for persons with an  
11 intellectual disability. *Cochrane Database Syst Rev* 2016;4:CD007492. doi:  
12 10.1002/14651858.CD007492.pub2 [published Online First: 2016/04/12]
- 13 37. Briggs CJ, Garner P. Strategies for integrating primary health services in middle- and low-income  
14 countries at the point of delivery. *Cochrane Database Syst Rev* 2006(2):CD003318. doi:  
15 10.1002/14651858.CD003318.pub2 [published Online First: 2006/04/21]
- 16 38. Kantor V, Knefel M, Lueger-Schuster B. Perceived barriers and facilitators of mental health service  
17 utilization in adult trauma survivors: A systematic review. *Clin Psychol Rev* 2017;52:52-68. doi:  
18 10.1016/j.cpr.2016.12.001 [published Online First: 2016/12/26]
- 19 39. National Heart L, and Blood Institute. Background: Development and Use of Study Quality  
20 Assessment Tools <https://www.nhlbi.nih.gov/node/80102>: U.S. Department of Health and  
21 Human Services.; [accessed September 10 2018].
- 22 40. Programme CAS. CASP Qualitative Checklist [https://casp-uk.net/wp-](https://casp-uk.net/wp-content/uploads/2018/01/CASP-Qualitative-Checklist.pdf2018)  
23 [content/uploads/2018/01/CASP-Qualitative-Checklist.pdf2018](https://casp-uk.net/wp-content/uploads/2018/01/CASP-Qualitative-Checklist.pdf2018) [accessed September 10 2018].
- 24 41. Popay J, Roberts H, Sowden A, et al. Guidance on the conduct of narrative synthesis in systematic  
25 reviews. *A product from the ESRC methods programme Version 2006*;1:b92.
- 26 42. Definitions of Sex and Gender Canada: Canadian Institutes of Health Research; 2015 [updated June  
27 17, 2015. Available from: <http://www.cihr-irsc.gc.ca/e/47830.html> accessed September 21  
28 2018.
- 29 43. Colantonio A, Balogh R, Chan V, et al. Integrating Brain Injury, Mental Health, and Addictions.  
30 Toronto: Ministry of Health and Long Term Care, 2017.
- 31
- 32
- 33
- 34
- 35
- 36
- 37
- 38
- 39
- 40
- 41
- 42
- 43
- 44
- 45
- 46
- 47
- 48
- 49
- 50
- 51
- 52
- 53
- 54
- 55
- 56
- 57
- 58
- 59
- 60

## **SEARCH STRATEGIES**

Database: Ovid MEDLINE: Epub Ahead of Print, In-Process & Other Non-Indexed Citations, Ovid MEDLINE® Daily and Ovid MEDLINE<1946 to August 10, 2018>

Search Strategy:

- 
- 1 exp Brain Injuries/ (62332)
  - 2 exp Brain Injuries, Traumatic/ (9743)
  - 3 exp Brain Concussion/ (7389)
  - 4 Craniocerebral Trauma/ (21314)
  - 5 tbi\*2.tw,kf. (22847)
  - 6 mtbi\*2.tw,kf. (2223)
  - 7 wrTBI\*2.tw,kf. (12)
  - 8 concuss\*.tw,kf. (7606)
  - 9 postconcuss\*.tw,kf. (1154)
  - 10 ((brain or head\* or cerebr\* or crani\* or skull\* or intracran\*) adj2 (injur\* or trauma\* or damag\* or wound\* or fracture\* or contusion\*).tw,kf. (128306)
  - 11 ((brain\* or cerebr\* or intracerebr\* or crani\* or intracran\* or head\* or subdural\* or epidural\* or extradural\*) adj (haematoma\* or hematoma\* or hemorrhag\* or haemorrhag\*).tw,kf. (44556)
  - 12 "shaken baby".tw,kf. (605)
  - 13 or/1-12 (196484)
  - 14 exp Substance-Related Disorders/ (259829)
  - 15 gambling/ (4842)
  - 16 ((drug or substance? or alcohol or opioid? or amphetamine? or cocaine or marijuana or cannabis or phencyclidine or benzodiaz\*) adj2 (misuse or abuse\* or addict\* or depend\*).tw,kf. (108773)
  - 17 gambl???.tw,kf. (8414)
  - 18 (alcoholi\* or drinker\* or drinking).tw,kf. (177792)
  - 19 or/14-18 (424000)
  - 20 13 and 19 (3854)
  - 21 Mental Health/ (31512)
  - 22 mental disorders/ or exp anxiety disorders/ or exp "bipolar and related disorders"/ or "disruptive, impulse control, and conduct disorders"/ or exp dissociative disorders/ or exp "feeding and eating disorders"/ or exp mood disorders/ or neurodevelopmental disorders/ or anxiety, separation/ or exp "attention deficit and disruptive behavior disorders"/ or child behavior disorders/ or exp child development disorders, pervasive/ or schizophrenia, childhood/ or exp

1  
2  
3 personality disorders/ or exp "schizophrenia spectrum and other psychotic disorders"/ or exp  
4 "trauma and stressor related disorders"/ (586165)  
5  
6 23 Depression/ (103355)  
7  
8 24 exp Depressive Disorder, Major/ (26327)  
9  
10 25 exp Depressive Disorder/ (99948)  
11  
12 26 ((mental or psych\*) adj (health\* or illness\* or disease\* or condition\* or disorder?)).tw,kf.  
13 (241708)  
14  
15 27 anxiety.tw,kf. (163525)  
16  
17 28 PTSD.tw,kf. (20669)  
18  
19 29 post-traumatic stress disorder?.tw,kf. (9534)  
20  
21 30 obsessive compulsive.tw,kf. (15892)  
22  
23 31 (depression? or depressed or depressiv\* or MDD).tw,kf. (392484)  
24  
25 32 Schizophreni\*.tw,kf. (116454)  
26  
27 33 bipolar.tw,kf. (56704)  
28  
29 34 conduct disorder?.tw,kf. (4279)  
30  
31 35 attention deficit.tw,kf. (24841)  
32  
33 36 hoard\*.tw,kf. (1461)  
34  
35 37 or/21-36 (1084130)  
36  
37 38 13 and 37 (13021)  
38  
39 39 20 or 38 (15916)  
40  
41 40 exp "Delivery of Health Care, Integrated"/ (11218)  
42  
43 41 ((vertical or horizontal or integrat\* or coordinat\* or co-ordinat\* or link\*) and (care or health  
44 care or healthcare or service? or treatment? or therap\* or psychotherap\* or program\*)).tw,kf.  
45 (452323)  
46  
47 42 (integrat\* adj3 (care or health care or healthcare or service? or treatment? or therap\* or  
48 psychotherap\* or program\*)).tw,kf. (33149)  
49  
50 43 (connect\* adj3 (care or health care or healthcare or service? or treatment? or therap\* or  
51 psychotherap\* or program\*)).tw,kf. (4447)  
52  
53 44 (coordinat\* adj3 (care or health care or healthcare or service? or treatment? or therap\* or  
54 psychotherap\* or program\*)).tw,kf. (14002)  
55  
56 45 or/40-44 (461475)  
57  
58 46 39 and 45 (574)  
59  
60 47 (barrier? or hurdle? or obstacle? or challeng\* or incentiv\* or obstruct\* or refusal? or  
impedim\* or promot\* or facilitat\* or support\* or enabl\* or cause? or reason? or encourag\* or  
predict\* or hinder\* or willingness).tw,kf. (6647308)  
48 ((seek? or seeking) adj3 (help\* or treatment? or care)).tw,kf. (31739)  
49 47 or 48 (6661497)

- 1  
2  
3  
4 50 Community health services/ (30003)  
5 51 exp Primary Health Care/ (139690)  
6 52 Patient participation/ (22821)  
7  
8 53 Patient Care Team/ (60979)  
9 54 case management/ (9554)  
10 55 critical pathways/ (6019)  
11  
12 56 exp "continuity of patient care"/ (218438)  
13  
14 57 health education/ (57952)  
15 58 health promotion/ (67033)  
16 59 health planning/ (21288)  
17  
18 60 patient care management/ (3219)  
19 61 comprehensive health care/ (6407)  
20  
21 62 exp "delivery of health care"/ (978727)  
22 63 disease management/ (30690)  
23  
24 64 critical pathways/ (6019)  
25 65 patient-centered care/ (16429)  
26  
27 66 exp "outcome and process assessment (health care)"/ (977104)  
28 67 exp program evaluation/ (68936)  
29  
30 68 quality assurance, health care/ (54119)  
31 69 ((interdisciplin\* or inter-disciplin\* or interprofession\* or inter-profession\* or multidisciplin\* or  
32 multi-disciplin\* or multiprofession\* or multi-profession\*) adj3 (team or care or health care or  
33 healthcare or service? or treatment? or therap\* or program\*)).tw,kf. (38696)  
34 70 (engagement or engage or engaging or empower\* or participat\*).tw,kf. (569356)  
35 71 (governan\* or accountab\*).tw,kf. (25773)  
36 72 (model adj2 care).tw,kf. (8943)  
37 73 (educat\* or screen\* or train\* or transition\* or evaluat\* or coordinat\*).tw,kf. (4766860)  
38 74 or/50-73 (6666001)  
39 75 39 and 49 and 74 (2505)  
40 76 46 or 75 (2867)  
41 77 limit 76 to english language (2676)  
42 78 77 not (exp animals/ not exp humans/) (2521)  
43  
44  
45  
46  
47  
48  
49

50 \*\*\*\*\*

51  
52  
53 Database: **Cochrane Central Register of Controlled Trials** <2014 to Present>

54 Search Strategy:  
55  
56 -----  
57  
58  
59  
60



- 1 exp Brain Injuries/ (1732)
- 2 exp Brain Injuries, Traumatic/ (1732)
- 3 exp Brain Concussion/ (241)
- 4 Craniocerebral Trauma/ (283)
- 5 tbi\*2.tw,kf. (2040)
- 6 mtbi\*2.tw,kf. (250)
- 7 wrTBI\*2.tw,kf. (0)
- 8 concuss\*.tw,kf. (408)
- 9 postconcuss\*.tw,kf. (102)
- 10 ((brain or head\* or cerebr\* or crani\* or skull\* or intracran\*) adj2 (injur\* or trauma\* or damag\* or wound\* or fracture\* or contusion\*)).tw,kf. (6161)
- 11 ((brain\* or cerebr\* or intracerebr\* or crani\* or intracran\* or head\* or subdural\* or epidural\* or extradural\*) adj (haematoma\* or hematoma\* or hemorrhag\* or haemorrhag\*)).tw,kf. (3526)
- 12 "shaken baby".tw,kf. (9)
- 13 or/1-12 (10514)
- 14 exp Substance-Related Disorders/ (13128)
- 15 gambling/ (298)
- 16 ((drug or substance? or alcohol or opioid? or amphetamine? or cocaine or marijuana or cannabis or phencyclidine or benzodiaz\*) adj2 (misuse or abuse\* or addict\* or depend\*)).tw,kf. (10967)
- 17 gambli???.tw,kf. (623)
- 18 (alcoholi\* or drinker\* or drinking).tw,kf. (11000)
- 19 or/14-18 (26428)
- 20 13 and 19 (185)
- 21 Mental Health/ (1123)
- 22 mental disorders/ or exp anxiety disorders/ or exp "bipolar and related disorders"/ or "disruptive, impulse control, and conduct disorders"/ or exp dissociative disorders/ or exp "feeding and eating disorders"/ or exp mood disorders/ or neurodevelopmental disorders/ or anxiety, separation/ or exp "attention deficit and disruptive behavior disorders"/ or child behavior disorders/ or exp child development disorders, pervasive/ or schizophrenia, childhood/ or exp personality disorders/ or exp "schizophrenia spectrum and other psychotic disorders"/ or exp "trauma and stressor related disorders"/ (26375)
- 23 Depression/ (9417)
- 24 exp Depressive Disorder, Major/ (3972)
- 25 exp Depressive Disorder/ (10136)
- 26 ((mental or psych\*) adj (health\* or illness\* or disease\* or condition\* or disorder?)).tw,kf. (17190)

- 1  
2  
3 27 anxiety.tw,kf. (28440)  
4 28 PTSD.tw,kf. (2944)  
5 29 post-traumatic stress disorder?.tw,kf. (994)  
6 30 obsessive compulsive.tw,kf. (1950)  
7 31 (depression? or depressed or depressiv\* or MDD).tw,kf. (53605)  
8 32 Schizophreni\*.tw,kf. (12510)  
9 33 bipolar.tw,kf. (5592)  
10 34 conduct disorder?.tw,kf. (313)  
11 35 attention deficit.tw,kf. (2995)  
12 36 hoard\*.tw,kf. (53)  
13 37 or/21-36 (103330)  
14 38 13 and 37 (847)  
15 39 20 or 38 (939)  
16 40 exp "Delivery of Health Care, Integrated"/ (314)  
17 41 ((vertical or horizontal or integrat\* or coordinat\* or co-ordinat\* or link\*) and (care or health  
18 care or healthcare or service? or treatment? or therap\* or psychotherap\* or program\*)).tw,kf.  
19 (29535)  
20 42 (integrat\* adj3 (care or health care or healthcare or service? or treatment? or therap\* or  
21 psychotherap\* or program\*)).tw,kf. (4849)  
22 43 (connect\* adj3 (care or health care or healthcare or service? or treatment? or therap\* or  
23 psychotherap\* or program\*)).tw,kf. (688)  
24 44 (coordinat\* adj3 (care or health care or healthcare or service? or treatment? or therap\* or  
25 psychotherap\* or program\*)).tw,kf. (1369)  
26 45 or/40-44 (30171)  
27 46 39 and 45 (88)  
28 47 (barrier? or hurdle? or obstacle? or challeng\* or incentiv\* or obstruct\* or refusal? or  
29 impedim\* or promot\* or facilitat\* or support\* or enabl\* or cause? or reason? or encourag\* or  
30 predict\* or hinder\* or willingness).tw,kf. (311112)  
31 48 ((seek? or seeking) adj3 (help\* or treatment? or care)).tw,kf. (3523)  
32 49 47 or 48 (312722)  
33 50 Community health services/ (898)  
34 51 exp Primary Health Care/ (4481)  
35 52 Patient participation/ (1122)  
36 53 Patient Care Team/ (1538)  
37 54 case management/ (655)  
38 55 critical pathways/ (171)  
39 56 exp "continuity of patient care"/ (579)  
40  
41  
42  
43  
44  
45  
46  
47  
48  
49  
50  
51  
52  
53  
54  
55  
56  
57  
58  
59  
60

- 1  
2  
3 57 health education/ (3492)  
4 58 health promotion/ (4893)  
5 59 health planning/ (34)  
6 60 patient care management/ (119)  
7 61 comprehensive health care/ (67)  
8 62 exp "delivery of health care"/ (38828)  
9 63 disease management/ (804)  
10 64 critical pathways/ (171)  
11 65 patient-centered care/ (450)  
12 66 exp "outcome and process assessment (health care)"/ (127732)  
13 67 exp program evaluation/ (5433)  
14 68 quality assurance, health care/ (612)  
15 69 ((interdisciplin\* or inter-disciplin\* or interprofession\* or inter-profession\* or multidisciplin\* or  
16 multi-disciplin\* or multiprofession\* or multi-profession\*) adj3 (team or care or health care or  
17 healthcare or service? or treatment? or therap\* or program\*)).tw,kf. (3163)  
18 70 (engagement or engage or engaging or empower\* or participat\*).tw,kf. (73190)  
19 71 (governan\* or accountab\*).tw,kf. (574)  
20 72 (model adj2 care).tw,kf. (1606)  
21 73 (educat\* or screen\* or train\* or transition\* or evaluat\* or coordinat\*).tw,kf. (428554)  
22 74 or/50-73 (543646)  
23 75 39 and 49 and 74 (292)  
24 76 46 or 75 (336)  
25 77 limit 76 to english language (187)  
26  
27  
28  
29  
30  
31  
32  
33  
34  
35  
36  
37

38 \*\*\*\*\*  
39  
40

41 Database: **Embase Classic+Embase** <1947 to 2018 August 20>

42 Search Strategy:  
43  
44

- 45 -----  
46 1 exp brain injury/ (170129)  
47 2 head injury/ (50510)  
48 3 tbi\*2.tw. (37286)  
49 4 mtbi\*2.tw. (3458)  
50 5 wrTBI\*2.tw. (16)  
51 6 concuss\*.tw. (10071)  
52 7 postconcuss\*.tw. (1412)  
53  
54  
55  
56  
57  
58  
59  
60

- 1  
2  
3  
4 8 ((brain or head\* or cerebr\* or crani\* or skull\* or intracran\*) adj2 (injur\* or trauma\* or damag\*  
5 or wound\* or fracture\* or contusion\*)).tw. (173261)  
6  
7 9 ((brain\* or cerebr\* or intracerebr\* or crani\* or intracran\* or head\* or subdural\* or epidural\* or  
8 extradural\*) adj (haematoma\* or hematoma\* or hemorrhag\* or haemorrhag\*)).tw. (64309)  
9  
10 10 "shaken baby".tw. (743)  
11  
12 11 or/1-10 (329144)  
13  
14 12 addiction/ (51840)  
15  
16 13 exp drug dependence/ (227621)  
17  
18 14 pathological gambling/ (5577)  
19  
20 15 ((drug or substance? or alcohol or opioid? or amphetamine? or cocaine or marijuana or  
21 cannabis or phencyclidine or benzodiaz\*) adj2 (misuse or abuse\* or addict\* or depend\*)).tw.  
22 (146297)  
23  
24 16 gambl???.tw. (10917)  
25  
26 17 (alcoholi\* or drinker\* or drinking).tw. (248964)  
27  
28 18 or/12-17 (514147)  
29  
30 19 11 and 18 (6730)  
31  
32 20 exp mental health/ (132537)  
33  
34 21 mental disease/ (222219)  
35  
36 22 exp anxiety disorder/ (211380)  
37  
38 23 exp bipolar disorder/ (57278)  
39  
40 24 behavior disorder/ or attention deficit disorder/ or disruptive behavior/ or drug seeking  
41 behavior/ or impulse control disorder/ (107231)  
42  
43 25 exp dissociative disorder/ (8226)  
44  
45 26 exp eating disorder/ (47110)  
46  
47 27 exp mood disorder/ (461687)  
48  
49 28 exp autism/ (57648)  
50  
51 29 exp schizophrenia/ (181763)  
52  
53 30 exp personality disorder/ (59926)  
54  
55 31 exp psychosis/ (284664)  
56  
57 32 ((mental or psych\*) adj (health\* or illness\* or disease\* or condition\* or disorder?)).tw.  
58 (304770)  
59  
60 33 PTSD.tw. (25839)  
34 post-traumatic stress disorder?.tw. (12129)  
35 obsessive compulsive.tw. (20726)  
36 (depression? or depressed or depressiv\* or MDD).tw. (545145)  
37 Schizophreni\*.tw. (158068)  
38 bipolar.tw. (81682)

- 1  
2  
3  
4 39 conduct disorder?.tw. (5392)  
5 40 attention deficit.tw. (31286)  
6 41 hoard\*.tw. (1814)  
7  
8 42 or/20-41 (1531303)  
9 43 11 and 42 (29736)  
10 44 19 or 43 (34158)  
11 45 integrated health care system/ (9873)  
12 46 ((vertical or horizontal or integrat\* or coordinat\* or co-ordinat\* or link\*) and (care or health  
13 care or healthcare or service? or treatment? or therap\* or psychotherap\* or program\*)).tw.  
14 (624215)  
15 47 (integrat\* adj3 (care or health care or healthcare or service? or treatment? or therap\* or  
16 psychotherap\* or program\*)).tw. (44675)  
17 48 (connect\* adj3 (care or health care or healthcare or service? or treatment? or therap\* or  
18 psychotherap\* or program\*)).tw. (6653)  
19 49 (coordinat\* adj3 (care or health care or healthcare or service? or treatment? or therap\* or  
20 psychotherap\* or program\*)).tw. (19801)  
21 50 or/45-49 (634621)  
22 51 44 and 50 (1382)  
23 52 (barrier? or hurdle? or obstacle? or challeng\* or incentiv\* or obstruct\* or refusal? or  
24 impedim\* or promot\* or facilitat\* or support\* or enabl\* or cause? or reason? or encourag\* or  
25 predict\* or hinder\* or willingness).tw. (8662026)  
26 53 ((seek? or seeking) adj3 (help\* or treatment? or care)).tw. (40702)  
27 54 52 or 53 (8679961)  
28 55 exp community care/ (116494)  
29 56 exp primary health care/ (147878)  
30 57 patient participation/ (23829)  
31 58 exp patient care/ (719197)  
32 59 clinical pathway/ (7778)  
33 60 exp health education/ (297823)  
34 61 health care planning/ (94317)  
35 62 exp health care delivery/ (2870808)  
36 63 disease management/ (19050)  
37 64 outcome assessment/ (432109)  
38 65 exp health care quality/ (2772612)  
39 66 exp program evaluation/ (17544)  
40  
41  
42  
43  
44  
45  
46  
47  
48  
49  
50  
51  
52  
53  
54  
55  
56  
57  
58  
59  
60

- 1  
2  
3 67 ((interdisciplin\* or inter-disciplin\* or interprofession\* or inter-profession\* or multidisciplin\* or  
4 multi-disciplin\* or multiprofession\* or multi-profession\*) adj3 (team or care or health care or  
5 healthcare or service? or treatment? or therap\* or program\*)).tw. (64305)  
6  
7  
8 68 (engagement or engage or engaging or empower\* or participat\*).tw. (743424)  
9  
10 69 (governan\* or accountab\*).tw. (31041)  
11  
12 70 (model adj2 care).tw. (12583)  
13  
14 71 (educat\* or screen\* or train\* or transition\* or evaluat\* or coordinat\*).tw. (6328902)  
15  
16 72 or/55-71 (10373343)  
17  
18 73 44 and 54 and 72 (7037)  
19  
20 74 51 or 73 (7854)  
21  
22 75 limit 74 to english language (7426)  
23  
24 76 75 not ((exp animals/ or exp animal experimentation/ or nonhuman/) not exp human/)  
25 (6887)  
26  
27 77 limit 76 to conference abstracts (2365)  
28  
29 78 76 not 77 (4522)  
30  
31 79 78 not medline.cr. (4055)

32 \*\*\*\*\*

33 Database: **PsycINFO** <1806 to August Week 1 2018>

34 Search Strategy:

- 35 -----  
36 1 exp traumatic brain injury/ (17391)  
37 2 exp head injuries/ (5923)  
38 3 tbi\*2.tw. (9703)  
39 4 mtbi\*2.tw. (1562)  
40 5 wrTBI\*2.tw. (8)  
41 6 concuss\*.tw. (2850)  
42 7 postconcuss\*.tw. (796)  
43 8 ((brain or head\* or cerebr\* or crani\* or skull\* or intracran\*) adj2 (injur\* or trauma\* or damag\*  
44 or wound\* or fracture\* or contusion\*)).tw. (45163)  
45 9 ((brain\* or cerebr\* or intracerebr\* or crani\* or intracran\* or head\* or subdural\* or epidural\* or  
46 extradural\*) adj (haematoma\* or hematoma\* or hemorrhag\* or haemorrhag\*)).tw. (3211)  
47 10 "shaken baby".tw. (185)  
48 11 or/1-10 (49487)  
49 12 exp drug abuse/ (105296)  
50 13 "substance use disorder"/ (5723)  
51  
52  
53  
54  
55  
56  
57  
58  
59  
60

1  
2  
3  
4 14 addiction/ (9744)  
5 15 exp gambling/ (7117)  
6 16 ((drug or substance? or alcohol or opioid? or amphetamine? or cocaine or marijuana or  
7 cannabis or phencyclidine or benzodiaz\*) adj2 (misuse or abuse\* or addict\* or depend\*)).tw.  
8 (95808)  
9  
10 17 gambli???.tw. (11158)  
11  
12 18 (alcoholi\* or drinker\* or drinking).tw. (71401)  
13  
14 19 or/12-18 (189802)  
15  
16 20 11 and 19 (1834)  
17  
18 21 mental health/ (57737)  
19  
20 22 mental disorders/ (78899)  
21  
22 23 exp anxiety disorders/ (77257)  
23  
24 24 exp affective disorders/ (151634)  
25  
26 25 exp impulse control disorders/ (1034)  
27  
28 26 conduct disorder/ (4163)  
29  
30 27 behavior disorders/ (9073)  
31  
32 28 exp dissociative disorders/ (5069)  
33  
34 29 exp eating disorders/ (28488)  
35  
36 30 neurodevelopmental disorders/ (1969)  
37  
38 31 autism spectrum disorders/ (38498)  
39  
40 32 exp separation anxiety/ (1529)  
41  
42 33 exp attention deficit disorder/ (24934)  
43  
44 34 exp psychosis/ (109127)  
45  
46 35 exp personality disorders/ (33271)  
47  
48 36 exp posttraumatic stress disorder/ (29576)  
49  
50 37 ((mental or psych\*) adj (health\* or illness\* or disease\* or condition\* or disorder?)).tw.  
51 (306679)  
52  
53 38 anxiety.tw. (180502)  
54  
55 39 PTSD.tw. (29697)  
56  
57 40 post-traumatic stress disorder?.tw. (9443)  
58  
59 41 obsessive compulsive.tw. (19372)  
60  
42 (depression? or depressed or depressiv\* or MDD).tw. (278508)  
43 Schizophreni\*.tw. (118127)  
44 bipolar.tw. (37311)  
45 conduct disorder?.tw. (7217)  
46 attention deficit.tw. (29043)  
47 hoard\*.tw. (1855)

- 1  
2  
3  
4 48 or/21-47 (887448)  
5 49 11 and 48 (9062)  
6 50 20 or 49 (10045)  
7  
8 51 integrated services/ (3216)  
9 52 ((vertical or horizontal or integrat\* or coordinat\* or co-ordinat\* or link\*) and (care or health  
10 care or healthcare or service? or treatment? or therap\* or psychotherap\* or program\*)).tw.  
11 (152611)  
12  
13 53 (integrat\* adj3 (care or health care or healthcare or service? or treatment? or therap\* or  
14 psychotherap\* or program\*)).tw. (20889)  
15  
16 54 (connect\* adj3 (care or health care or healthcare or service? or treatment? or therap\* or  
17 psychotherap\* or program\*)).tw. (2818)  
18  
19 55 (coordinat\* adj3 (care or health care or healthcare or service? or treatment? or therap\* or  
20 psychotherap\* or program\*)).tw. (5590)  
21  
22 56 or/51-55 (155650)  
23  
24 57 50 and 56 (576)  
25  
26 58 Treatment Barriers/ (4168)  
27  
28 59 (barrier? or hurdle? or obstacle? or challeng\* or incentiv\* or obstruct\* or refusal? or  
29 impedim\* or promot\* or facilitat\* or support\* or enabl\* or cause? or reason? or encourag\* or  
30 predict\* or hinder\* or willingness).tw. (1644346)  
31  
32 60 ((seek? or seeking) adj3 (help\* or treatment? or care)).tw. (24738)  
33  
34 61 or/58-60 (1655245)  
35  
36 62 exp community services/ (31008)  
37  
38 63 primary health care/ (16770)  
39  
40 64 health care services/ (40379)  
41  
42 65 "continuum of care"/ (1628)  
43  
44 66 health care delivery/ (19878)  
45  
46 67 interdisciplinary treatment approach/ (6871)  
47  
48 68 client participation/ (1850)  
49  
50 69 exp case management/ (3343)  
51  
52 70 exp managed care/ (4298)  
53  
54 71 client centered therapy/ (3105)  
55  
56 72 exp "quality of services"/ (17955)  
57  
58 73 exp health education/ or client education/ (20686)  
59  
60 74 health promotion/ (22605)  
61  
62 75 exp treatment planning/ (6202)  
63  
64 76 disease management/ (6121)  
65  
66 77 exp program evaluation/ (19435)  
67  
68  
69  
70  
71  
72  
73  
74  
75  
76  
77



1  
2  
3  
4 78 ((interdisciplin\* or inter-disciplin\* or interprofession\* or inter-profession\* or multidisciplin\* or  
5 multi-disciplin\* or multiprofession\* or multi-profession\*) adj3 (team or care or health care or  
6 healthcare or service? or treatment? or therap\* or program\*)).tw. (11242)  
7  
8 79 (engagement or engage or engaging or empower\* or participat\*).tw. (374143)  
9  
10 80 (governan\* or accountab\*).tw. (25304)  
11  
12 81 (model adj2 care).tw. (3435)  
13  
14 82 (educat\* or screen\* or train\* or transition\* or evaluat\* or coordinat\*).tw. (1245279)  
15  
16 83 or/62-82 (1562608)  
17  
18 84 50 and 61 and 83 (1650)  
19  
20 85 57 or 84 (2011)  
21  
22 86 limit 85 to english language (1934)  
23  
24 87 limit 86 to animal (115)  
25  
26 88 limit 87 to human (33)  
27  
28 89 86 not (87 not 88) (1852)  
29  
30 90 limit 89 to ("0200 book" or "0240 authored book" or "0280 edited book" or "0300  
31 encyclopedia") (458)  
32  
33 91 89 not 90 (1394)  
34

\*\*\*\*\*

Database: CINAHL (searched 2018.08.21)

| #   | Query                                                                                                                                                                                                                     | Limiters/Expanders                                           | Results   |
|-----|---------------------------------------------------------------------------------------------------------------------------------------------------------------------------------------------------------------------------|--------------------------------------------------------------|-----------|
| S81 | S80                                                                                                                                                                                                                       | Limiters - English Language<br>Search modes - Boolean/Phrase | 1,242     |
| S80 | S52 OR S79                                                                                                                                                                                                                | Search modes - Boolean/Phrase                                | 1,250     |
| S79 | S45 AND S55 AND S78                                                                                                                                                                                                       | Search modes - Boolean/Phrase                                | 1,123     |
| S78 | S56 OR S57 OR S58 OR S59 OR S60 OR<br>S61 OR S62 OR S63 OR S64 OR S65 OR<br>S66 OR S67 OR S68 OR S69 OR S70 OR<br>S71 OR S72 OR S73 OR S74 OR S75 OR<br>S76 OR S77                                                        | Search modes - Boolean/Phrase                                | 1,628,534 |
| S77 | (educat* or screen* or train* or<br>transition* or evaluat* or coordinat*)                                                                                                                                                | Search modes - Boolean/Phrase                                | 1,128,349 |
| S76 | (model n2 care)                                                                                                                                                                                                           | Search modes - Boolean/Phrase                                | 11,356    |
| S75 | (governan* or accountab*)                                                                                                                                                                                                 | Search modes - Boolean/Phrase                                | 24,583    |
| S74 | (engagement or engage or engaging or<br>empower* or participat*)                                                                                                                                                          | Search modes - Boolean/Phrase                                | 175,276   |
| S73 | ((interdisciplin* or inter-disciplin* or<br>interprofession* or inter-profession* or<br>multidisciplin* or multi-disciplin* or<br>multiprofession* or multi-profession*) n3<br>(team or care or health care or healthcare | Search modes - Boolean/Phrase                                | 39,697    |

|     |                                                                                                                                                                                                                          |                               |         |
|-----|--------------------------------------------------------------------------------------------------------------------------------------------------------------------------------------------------------------------------|-------------------------------|---------|
|     | or service* or treatment* or therap* or program*))                                                                                                                                                                       |                               |         |
| S72 | (MH "Quality of Health Care+")                                                                                                                                                                                           | Search modes - Boolean/Phrase | 413,487 |
| S71 | (MH "Program Development+")                                                                                                                                                                                              | Search modes - Boolean/Phrase | 51,590  |
| S70 | (MH "Outcome Assessment")                                                                                                                                                                                                | Search modes - Boolean/Phrase | 23,937  |
| S69 | (MH "Process Assessment (Health Care)+")                                                                                                                                                                                 | Search modes - Boolean/Phrase | 5,750   |
| S68 | (MH "Patient Centered Care")                                                                                                                                                                                             | Search modes - Boolean/Phrase | 18,429  |
| S67 | (MH "Disease Management+")                                                                                                                                                                                               | Search modes - Boolean/Phrase | 11,760  |
| S66 | (MH "Health Care Delivery+")                                                                                                                                                                                             | Search modes - Boolean/Phrase | 210,880 |
| S65 | (MH "Patient Care Plans+")                                                                                                                                                                                               | Search modes - Boolean/Phrase | 6,852   |
| S64 | (MH "Health Promotion")                                                                                                                                                                                                  | Search modes - Boolean/Phrase | 39,646  |
| S63 | (MH "Health Education+")                                                                                                                                                                                                 | Search modes - Boolean/Phrase | 88,614  |
| S62 | (MH "Continuity of Patient Care+")                                                                                                                                                                                       | Search modes - Boolean/Phrase | 12,938  |
| S61 | (MH "Critical Path")                                                                                                                                                                                                     | Search modes - Boolean/Phrase | 3,710   |
| S60 | (MH "Case Management")                                                                                                                                                                                                   | Search modes - Boolean/Phrase | 13,403  |
| S59 | (MH "Multidisciplinary Care Team")                                                                                                                                                                                       | Search modes - Boolean/Phrase | 28,529  |
| S58 | (MH "Consumer Participation")                                                                                                                                                                                            | Search modes - Boolean/Phrase | 12,214  |
| S57 | (MH "Primary Health Care")                                                                                                                                                                                               | Search modes - Boolean/Phrase | 38,581  |
| S56 | (MH "Community Health Services")                                                                                                                                                                                         | Search modes - Boolean/Phrase | 13,940  |
| S55 | S53 OR S54                                                                                                                                                                                                               | Search modes - Boolean/Phrase | 903,092 |
| S54 | ((seek or seeks or seeking) n3 (help* or treatment* or care))                                                                                                                                                            | Search modes - Boolean/Phrase | 13,303  |
| S53 | (barrier* or hurdle* or obstacle* or challeng* or incentiv* or obstruct* or refusal* or impedim* or promot* or facilitat* or support* or enabl* or cause* or reason* or encourag* or predict* or hinder* or willingness) | Search modes - Boolean/Phrase | 897,161 |
| S52 | S45 AND S51                                                                                                                                                                                                              | Search modes - Boolean/Phrase | 240     |
| S51 | S46 OR S47 OR S48 OR S49 OR S50                                                                                                                                                                                          | Search modes - Boolean/Phrase | 112,403 |
| S50 | (coordinat* n3 (care or health care or healthcare or service* or treatment* or therap* or psychotherap* or program*))                                                                                                    | Search modes - Boolean/Phrase | 6,957   |
| S49 | (connect* n3 (care or health care or healthcare or service* or treatment* or therap* or psychotherap* or program*))                                                                                                      | Search modes - Boolean/Phrase | 2,263   |
| S48 | (integrat* n3 (care or health care or healthcare or service* or treatment* or therap* or psychotherap* or program*))                                                                                                     | Search modes - Boolean/Phrase | 19,214  |
| S47 | ((vertical or horizontal or integrat* or coordinat* or co-ordinat* or link*) and (care or health care or healthcare or service* or treatment* or therap* or psychotherap* or program*))                                  | Search modes - Boolean/Phrase | 110,503 |
| S46 | (MH "Health Care Delivery, Integrated")                                                                                                                                                                                  | Search modes - Boolean/Phrase | 6,478   |
| S45 | S19 OR S44                                                                                                                                                                                                               | Search modes - Boolean/Phrase | 4,356   |
| S44 | S12 AND S43                                                                                                                                                                                                              | Search modes - Boolean/Phrase | 3,562   |
| S43 | S20 OR S21 OR S22 OR S23 OR S24 OR S25 OR S26 OR S27 OR S28 OR S29 OR S30 OR S31 OR S32 OR S33 OR S34 OR S35 OR S36 OR S37 OR S38 OR S39 OR S40 OR S41 OR S42                                                            | Search modes - Boolean/Phrase | 295,552 |
| S42 | hoard*                                                                                                                                                                                                                   | Search modes - Boolean/Phrase | 279     |

|     |                                                                                                                                                                                                                                                                                     |                               |         |
|-----|-------------------------------------------------------------------------------------------------------------------------------------------------------------------------------------------------------------------------------------------------------------------------------------|-------------------------------|---------|
| S41 | attention deficit                                                                                                                                                                                                                                                                   | Search modes - Boolean/Phrase | 8,798   |
| S40 | conduct disorder*                                                                                                                                                                                                                                                                   | Search modes - Boolean/Phrase | 762     |
| S39 | bipolar                                                                                                                                                                                                                                                                             | Search modes - Boolean/Phrase | 7,852   |
| S38 | Schizophreni*                                                                                                                                                                                                                                                                       | Search modes - Boolean/Phrase | 13,979  |
| S37 | ((depression* or depressed or depressiv* or MDD)                                                                                                                                                                                                                                    | Search modes - Boolean/Phrase | 92,716  |
| S36 | obsessive compulsive                                                                                                                                                                                                                                                                | Search modes - Boolean/Phrase | 2,839   |
| S35 | post-traumatic stress disorder*                                                                                                                                                                                                                                                     | Search modes - Boolean/Phrase | 2,651   |
| S34 | PTSD                                                                                                                                                                                                                                                                                | Search modes - Boolean/Phrase | 4,813   |
| S33 | anxiety                                                                                                                                                                                                                                                                             | Search modes - Boolean/Phrase | 48,239  |
| S32 | ((mental or psych*) n1 (health* or illness* or disease* or condition* or disorder*))                                                                                                                                                                                                | Search modes - Boolean/Phrase | 150,733 |
| S31 | (MH "Stress Disorders, Post-Traumatic")                                                                                                                                                                                                                                             | Search modes - Boolean/Phrase | 11,557  |
| S30 | (MH "Attention Deficit Hyperactivity Disorder") OR (MH "Mental Disorders Diagnosed in Childhood") OR (MH "Child Behavior Disorders+") OR (MH "Child Development Disorders+") OR (MH "Child Development Disorders, Pervasive+") OR (MH "Feeding and Eating Disorders of Childhood+") | Search modes - Boolean/Phrase | 28,519  |
| S29 | (MH "Separation Anxiety")                                                                                                                                                                                                                                                           | Search modes - Boolean/Phrase | 382     |
| S28 | (MH "Depression+")                                                                                                                                                                                                                                                                  | Search modes - Boolean/Phrase | 59,957  |
| S27 | (MH "Affective Disorders+")                                                                                                                                                                                                                                                         | Search modes - Boolean/Phrase | 63,151  |
| S26 | (MH "Eating Disorders+")                                                                                                                                                                                                                                                            | Search modes - Boolean/Phrase | 11,050  |
| S25 | (MH "Dissociative Disorders+")                                                                                                                                                                                                                                                      | Search modes - Boolean/Phrase | 665     |
| S24 | (MH "Personality Disorders+")                                                                                                                                                                                                                                                       | Search modes - Boolean/Phrase | 6,356   |
| S23 | (MH "Affective Disorders, Psychotic+") OR (MH "Psychotic Disorders") OR (MH "Schizoaffective Disorder") OR (MH "Schizophrenia+")                                                                                                                                                    | Search modes - Boolean/Phrase | 19,775  |
| S22 | (MH "Anxiety Disorders+")                                                                                                                                                                                                                                                           | Search modes - Boolean/Phrase | 21,620  |
| S21 | (MH "Mental Disorders")                                                                                                                                                                                                                                                             | Search modes - Boolean/Phrase | 33,506  |
| S20 | (MH "Mental Health")                                                                                                                                                                                                                                                                | Search modes - Boolean/Phrase | 18,412  |
| S19 | S12 AND S18                                                                                                                                                                                                                                                                         | Search modes - Boolean/Phrase | 1,098   |
| S18 | S13 OR S14 OR S15 OR S16 OR S17                                                                                                                                                                                                                                                     | Search modes - Boolean/Phrase | 122,473 |
| S17 | alcoholi* or drinker* or drinking                                                                                                                                                                                                                                                   | Search modes - Boolean/Phrase | 37,825  |
| S16 | (gamble* or gambling*)                                                                                                                                                                                                                                                              | Search modes - Boolean/Phrase | 1,914   |
| S15 | ((drug or substance* or alcohol or opioid* or amphetamine* or cocaine or marijuana or cannabis or phencyclidine or benzodiaz*) n2 (misuse or abuse* or addict* or depend*))                                                                                                         | Search modes - Boolean/Phrase | 56,272  |
| S14 | (MH "Gambling")                                                                                                                                                                                                                                                                     | Search modes - Boolean/Phrase | 1,265   |
| S13 | (MH "Substance Use Disorders+")                                                                                                                                                                                                                                                     | Search modes - Boolean/Phrase | 93,525  |
| S12 | S1 OR S2 OR S3 OR S4 OR S5 OR S6 OR S7 OR S8 OR S9 OR S10 OR S11                                                                                                                                                                                                                    | Search modes - Boolean/Phrase | 41,008  |
| S11 | shaken baby                                                                                                                                                                                                                                                                         | Search modes - Boolean/Phrase | 392     |
| S10 | ((brain* or cerebr* or intracerebr* or crani* or intracran* or head* or subdural* or epidural* or extradural*) n1 (haematoma* or hematoma* or hemorrhag* or haemorrhag*))                                                                                                           | Search modes - Boolean/Phrase | 9,061   |

|    |                                                                                                                                       |                               |        |
|----|---------------------------------------------------------------------------------------------------------------------------------------|-------------------------------|--------|
| S9 | ((brain or head* or cerebr* or crani* or skull* or intracran*) n2 (injur* or trauma* or damag* or wound* or fracture* or contusion*)) | Search modes - Boolean/Phrase | 30,635 |
| S8 | postconcuss*                                                                                                                          | Search modes - Boolean/Phrase | 741    |
| S7 | concuss*                                                                                                                              | Search modes - Boolean/Phrase | 3,360  |
| S6 | wrTBI*                                                                                                                                | Search modes - Boolean/Phrase | 7      |
| S5 | mTBI*                                                                                                                                 | Search modes - Boolean/Phrase | 614    |
| S4 | TBI*                                                                                                                                  | Search modes - Boolean/Phrase | 5,222  |
| S3 | (MH "Head Injuries")                                                                                                                  | Search modes - Boolean/Phrase | 4,698  |
| S2 | (MH "Brain Concussion+")                                                                                                              | Search modes - Boolean/Phrase | 2,888  |
| S1 | (MH "Brain Injuries+")                                                                                                                | Search modes - Boolean/Phrase | 18,914 |

### Database: **Sociological Abstracts**

(noft(tbi\* OR mtbi\* OR concuss\* OR postconcuss\* OR "shaken baby") OR noft(((brain OR head\* OR cerebr\* OR crani\* OR skull\* OR intracran\*) NEAR/2 (injur\* OR trauma\* OR damag\* OR wound\* OR fracture\* OR contusion\*)))) AND (noft(((drug OR substance? OR alcohol OR opioid? OR amphetamine? OR cocaine OR marijuana OR cannabis OR phencyclidine OR benzodiaz\*) NEAR/2 (misuse OR abuse\* OR addict\* OR depend\*))) OR noft(gambl???) OR noft((alcoholi\* OR drinker\* OR drinking)) OR noft(((mental OR psych\*) NEAR/1 (health\* OR illness\* OR disease\* OR condition\* OR disorder?))) OR noft(anxiety OR PTSD OR "post-traumatic stress" OR "obsessive compulsive" OR depression? OR depressed OR depressiv\* OR MDD OR Schizophreni\* OR "attention deficit" OR hoard\*) OR noft("conduct disorder" OR "conduct disorders"))

#### Limits applied

- Language: English
- Exclude: Books; Magazines

### Database: **ProQuest Dissertations & Theses Global**

((noft(tbi\* OR mtbi\* OR concuss\* OR postconcuss\* OR "shaken baby") OR noft(((brain OR head\* OR cerebr\* OR crani\* OR skull\* OR intracran\*) NEAR/2 (injur\* OR trauma\* OR damag\* OR wound\* OR fracture\* OR contusion\*)))) AND (noft(((drug OR substance? OR alcohol OR opioid? OR amphetamine? OR cocaine OR marijuana OR cannabis OR phencyclidine OR benzodiaz\*) NEAR/2 (misuse OR abuse\* OR addict\* OR depend\*))) OR noft(gambl???) OR noft((alcoholi\* OR drinker\* OR drinking)) OR noft(((mental OR psych\*) NEAR/1 (health\* OR illness\* OR disease\* OR condition\* OR disorder?))) OR noft(anxiety OR PTSD OR "post-traumatic stress" OR "obsessive compulsive" OR depression? OR depressed OR depressiv\* OR MDD OR Schizophreni\* OR "attention deficit" OR hoard\*) OR noft("conduct disorder" OR "conduct disorders")) AND ((noft(barrier\* OR hurdle\* OR obstacle\* OR challeng\* OR incentiv\* OR obstruct\* OR refusal\* OR impedim\* OR promot\* OR facilitat\* OR support\* OR enabl\* OR cause\* OR reason\* OR encourag\* OR predict\* OR hinder\* OR willingness) OR noft(seek\* NEAR/3 help\*) OR noft(seek\* NEAR/3 treatment\*) OR noft(seek\* NEAR/3 care)) AND (noft((interdisciplin\* OR inter-disciplin\* OR interprofession\* OR inter-profession\* OR multidisciplin\* OR multi-disciplin\* OR multiprofession\* OR multi-profession\*)) OR noft(engagement OR engage OR engaging OR

1  
 2  
 3 empower\* OR participat\*) OR noft(governan\* OR accountab\*) OR noft(model NEAR/2 care)  
 4 OR noft(educat\* OR screen\* OR train\* OR transition\* OR evaluat\* OR coordinat\*)) OR  
 5 (((noft(tbi\* OR mtbi\* OR concuss\* OR postconcuss\* OR "shaken baby") OR noft(((brain OR  
 6 head\* OR cerebr\* OR crani\* OR skull\* OR intracran\*) NEAR/2 (injur\* OR trauma\* OR  
 7 damag\* OR wound\* OR fracture\* OR contusion\*)))) AND (noft(((drug OR substance? OR  
 8 alcohol OR opioid? OR amphetamine? OR cocaine OR marijuana OR cannabis OR  
 9 phencyclidine OR benzodiaz\*) NEAR/2 (misuse OR abuse\* OR addict\* OR depend\*)) OR  
 10 noft(gambl???) OR noft((alcoholi\* OR drinker\* OR drinking)) OR noft(((mental OR psych\*)  
 11 NEAR/1 (health\* OR illness\* OR disease\* OR condition\* OR disorder?)) OR noft(anxiety OR  
 12 PTSD OR "post-traumatic stress" OR "obsessive compulsive" OR depression? OR  
 13 depressed OR depressiv\* OR MDD OR Schizophreni\* OR "attention deficit" OR hoard\*) OR  
 14 noft("conduct disorder" OR "conduct disorders")) AND ((noft((vertical OR horizontal OR  
 15 integrat\* OR coordinat\* OR co-ordinat\* OR link\*)) AND noft((care OR health care OR  
 16 healthcare OR service\* OR treatment\* OR therap\* OR psychotherap\* OR program\*)) OR  
 17 (noft((integrat\*) NEAR/3 (care)) OR noft((integrat\*) NEAR/3 ("health care")) OR  
 18 noft((integrat\*) NEAR/3 (healthcare)) OR noft((integrat\*) NEAR/3 (healthcare)) OR  
 19 noft((integrat\*) NEAR/3 (service\*)) OR noft((integrat\*) NEAR/3 (treatment\*)) OR  
 20 noft((integrat\*) NEAR/3 (therap\*)) OR noft((integrat\*) NEAR/3 (psychotherap\*)) OR  
 21 noft((integrat\*) NEAR/3 (program\*)) OR noft((coordinat\*) NEAR/3 (care)) OR  
 22 noft((coordinat\*) NEAR/3 ("health care")) OR noft((coordinat\*) NEAR/3 (healthcare)) OR  
 23 noft((coordinat\*) NEAR/3 (healthcare)) OR noft((coordinat\*) NEAR/3 (service\*)) OR  
 24 noft((coordinat\*) NEAR/3 (treatment\*)) OR noft((coordinat\*) NEAR/3 (therap\*)) OR  
 25 noft((coordinat\*) NEAR/3 (psychotherap\*)) OR noft((coordinat\*) NEAR/3 (program\*)) OR  
 26 noft((connect\*) NEAR/3 (care)) OR noft((connect\*) NEAR/3 ("health care")) OR  
 27 noft((connect\*) NEAR/3 (healthcare)) OR noft((connect\*) NEAR/3 (healthcare)) OR  
 28 noft((connect\*) NEAR/3 (service\*)) OR noft((connect\*) NEAR/3 (treatment\*)) OR  
 29 noft((connect\*) NEAR/3 (therap\*)) OR noft((connect\*) NEAR/3 (psychotherap\*)) OR  
 30 noft((connect\*) NEAR/3 (program\*))))Limits applied  
 31  
 32

33 Limits applied:

- 34 • Language: English
- 35  
36  
37  
38  
39  
40  
41  
42  
43  
44  
45  
46  
47  
48  
49  
50  
51  
52  
53  
54  
55  
56  
57  
58  
59  
60

**PRISMA-P (Preferred Reporting Items for Systematic review and Meta-Analysis Protocols) 2015 checklist: recommended items to address in a systematic review protocol\***

| Section and topic                 | Item No | Checklist item                                                                                                                                                                                                                            |
|-----------------------------------|---------|-------------------------------------------------------------------------------------------------------------------------------------------------------------------------------------------------------------------------------------------|
| <b>ADMINISTRATIVE INFORMATION</b> |         |                                                                                                                                                                                                                                           |
| Title:                            |         |                                                                                                                                                                                                                                           |
| Identification                    | 1a      | Identify the report as a protocol of a systematic review (PAGE 1)                                                                                                                                                                         |
| Update                            | 1b      | If the protocol is for an update of a previous systematic review, identify as such (N/A)                                                                                                                                                  |
| Registration                      | 2       | If registered, provide the name of the registry (such as PROSPERO) and registration number (PAGE 2)                                                                                                                                       |
| Authors:                          |         |                                                                                                                                                                                                                                           |
| Contact                           | 3a      | Provide name, institutional affiliation, e-mail address of all protocol authors; provide physical mailing address of corresponding author (PAGE 1)                                                                                        |
| Contributions                     | 3b      | Describe contributions of protocol authors and identify the guarantor of the review (PAGE 8)                                                                                                                                              |
| Amendments                        | 4       | If the protocol represents an amendment of a previously completed or published protocol, identify as such and list changes; otherwise, state plan for documenting important protocol amendments (N/A)                                     |
| Support:                          |         |                                                                                                                                                                                                                                           |
| Sources                           | 5a      | Indicate sources of financial or other support for the review (PAGE 8)                                                                                                                                                                    |
| Sponsor                           | 5b      | Provide name for the review funder and/or sponsor (PAGE 8)                                                                                                                                                                                |
| Role of sponsor or funder         | 5c      | Describe roles of funder(s), sponsor(s), and/or institution(s), if any, in developing the protocol (PAGE 8)                                                                                                                               |
| <b>INTRODUCTION</b>               |         |                                                                                                                                                                                                                                           |
| Rationale                         | 6       | Describe the rationale for the review in the context of what is already known (PAGE 4)                                                                                                                                                    |
| Objectives                        | 7       | Provide an explicit statement of the question(s) the review will address with reference to participants, interventions, comparators, and outcomes (PICO) (PAGE 4)                                                                         |
| <b>METHODS</b>                    |         |                                                                                                                                                                                                                                           |
| Eligibility criteria              | 8       | Specify the study characteristics (such as PICO, study design, setting, time frame) and report characteristics (such as years considered, language, publication status) to be used as criteria for eligibility for the review (PAGES 5-6) |
| Information sources               | 9       | Describe all intended information sources (such as electronic databases, contact with study authors, trial registers or other grey literature sources) with planned dates of coverage (PAGES 5)                                           |
| Search strategy                   | 10      | Present draft of search strategy to be used for at least one electronic database, including planned limits, such that it could be repeated (PAGE 5)                                                                                       |
| Study records:                    |         |                                                                                                                                                                                                                                           |
| Data management                   | 11a     | Describe the mechanism(s) that will be used to manage records and data throughout the review (PAGE 5)                                                                                                                                     |

|                                    |     |                                                                                                                                                                                                                                                        |
|------------------------------------|-----|--------------------------------------------------------------------------------------------------------------------------------------------------------------------------------------------------------------------------------------------------------|
| Selection process                  | 11b | State the process that will be used for selecting studies (such as two independent reviewers) through each phase of the review (that is, screening, eligibility and inclusion in meta-analysis) (PAGE 5-6)                                             |
| Data collection process            | 11c | Describe planned method of extracting data from reports (such as piloting forms, done independently, in duplicate), any processes for obtaining and confirming data from investigators (PAGE 6)                                                        |
| Data items                         | 12  | List and define all variables for which data will be sought (such as PICO items, funding sources), any pre-planned data assumptions and simplifications (PAGE 6)                                                                                       |
| Outcomes and prioritization        | 13  | List and define all outcomes for which data will be sought, including prioritization of main and additional outcomes, with rationale (PAGE 5-6)                                                                                                        |
| Risk of bias in individual studies | 14  | Describe anticipated methods for assessing risk of bias of individual studies, including whether this will be done at the outcome or study level, or both; state how this information will be used in data synthesis (PAGE 6)                          |
| Data synthesis                     | 15a | Describe criteria under which study data will be quantitatively synthesised (N/A)                                                                                                                                                                      |
|                                    | 15b | If data are appropriate for quantitative synthesis, describe planned summary measures, methods of handling data and methods of combining data from studies, including any planned exploration of consistency (such as $I^2$ , Kendall's $\tau$ ) (N/A) |
|                                    | 15c | Describe any proposed additional analyses (such as sensitivity or subgroup analyses, meta-regression) (PAGE 7)                                                                                                                                         |
|                                    | 15d | If quantitative synthesis is not appropriate, describe the type of summary planned (PAGE 7)                                                                                                                                                            |
| Meta-bias(es)                      | 16  | Specify any planned assessment of meta-bias(es) (such as publication bias across studies, selective reporting within studies) (N/A)                                                                                                                    |
| Confidence in cumulative evidence  | 17  | Describe how the strength of the body of evidence will be assessed (such as GRADE) (PAGE 6)                                                                                                                                                            |

**\* It is strongly recommended that this checklist be read in conjunction with the PRISMA-P Explanation and Elaboration (cite when available) for important clarification on the items. Amendments to a review protocol should be tracked and dated. The copyright for PRISMA-P (including checklist) is held by the PRISMA-P Group and is distributed under a Creative Commons Attribution Licence 4.0.**

*From: Shamseer L, Moher D, Clarke M, Ghersi D, Liberati A, Petticrew M, Shekelle P, Stewart L, PRISMA-P Group. Preferred reporting items for systematic review and meta-analysis protocols (PRISMA-P) 2015: elaboration and explanation. BMJ. 2015 Jan 2;349(jan02 1):g7647.*
