# Supplementary material for: Systematic review protocol for facilitators and barriers to integrating health services for traumatic brain injury and mental health or addictions
Source: PubMed Central journal article supplement — BMJ Open. 2019 Jul 23;9(7):e027534. doi: 10.1136/bmjopen-2018-027534 (PMC6661659; doi:10.1136/bmjopen-2018-027534), 2019-07-23
Supplement: bmjopen-2018-027534supp001.pdf [file bmjopen-2018-027534supp001.pdf]

## **SEARCH STRATEGIES**

Database: Ovid MEDLINE: Epub Ahead of Print, In-Process & Other Non-Indexed Citations, Ovid MEDLINE® Daily and Ovid MEDLINE<1946 to August 10, 2018>

Search Strategy:

- 
- 1 exp Brain Injuries/ (62332)
  - 2 exp Brain Injuries, Traumatic/ (9743)
  - 3 exp Brain Concussion/ (7389)
  - 4 Craniocerebral Trauma/ (21314)
  - 5 tbi\*2.tw,kf. (22847)
  - 6 mtbi\*2.tw,kf. (2223)
  - 7 wrTBI\*2.tw,kf. (12)
  - 8 concuss\*.tw,kf. (7606)
  - 9 postconcuss\*.tw,kf. (1154)
  - 10 ((brain or head\* or cerebr\* or crani\* or skull\* or intracran\*) adj2 (injur\* or trauma\* or damag\* or wound\* or fracture\* or contusion\*)).tw,kf. (128306)
  - 11 ((brain\* or cerebr\* or intracerebr\* or crani\* or intracran\* or head\* or subdural\* or epidural\* or extradural\*) adj (haematoma\* or hematoma\* or hemorrhag\* or haemorrhag\*)).tw,kf. (44556)
  - 12 "shaken baby".tw,kf. (605)
  - 13 or/1-12 (196484)
  - 14 exp Substance-Related Disorders/ (259829)
  - 15 gambling/ (4842)
  - 16 ((drug or substance? or alcohol or opioid? or amphetamine? or cocaine or marijuana or cannabis or phencyclidine or benzodiaz\*) adj2 (misuse or abuse\* or addict\* or depend\*)).tw,kf. (108773)
  - 17 gambl???.tw,kf. (8414)
  - 18 (alcoholi\* or drinker\* or drinking).tw,kf. (177792)
  - 19 or/14-18 (424000)
  - 20 13 and 19 (3854)
  - 21 Mental Health/ (31512)
  - 22 mental disorders/ or exp anxiety disorders/ or exp "bipolar and related disorders"/ or "disruptive, impulse control, and conduct disorders"/ or exp dissociative disorders/ or exp "feeding and eating disorders"/ or exp mood disorders/ or neurodevelopmental disorders/ or anxiety, separation/ or exp "attention deficit and disruptive behavior disorders"/ or child behavior disorders/ or exp child development disorders, pervasive/ or schizophrenia, childhood/ or exp

personality disorders/ or exp "schizophrenia spectrum and other psychotic disorders"/ or exp "trauma and stressor related disorders"/ (586165)

23 Depression/ (103355)

24 exp Depressive Disorder, Major/ (26327)

25 exp Depressive Disorder/ (99948)

26 ((mental or psych\*) adj (health\* or illness\* or disease\* or condition\* or disorder?)).tw,kf. (241708)

27 anxiety.tw,kf. (163525)

28 PTSD.tw,kf. (20669)

29 post-traumatic stress disorder?.tw,kf. (9534)

30 obsessive compulsive.tw,kf. (15892)

31 (depression? or depressed or depressiv\* or MDD).tw,kf. (392484)

32 Schizophreni\*.tw,kf. (116454)

33 bipolar.tw,kf. (56704)

34 conduct disorder?.tw,kf. (4279)

35 attention deficit.tw,kf. (24841)

36 hoard\*.tw,kf. (1461)

37 or/21-36 (1084130)

38 13 and 37 (13021)

39 20 or 38 (15916)

40 exp "Delivery of Health Care, Integrated"/ (11218)

41 ((vertical or horizontal or integrat\* or coordinat\* or co-ordinat\* or link\*) and (care or health care or healthcare or service? or treatment? or therap\* or psychotherap\* or program\*)).tw,kf. (452323)

42 (integrat\* adj3 (care or health care or healthcare or service? or treatment? or therap\* or psychotherap\* or program\*)).tw,kf. (33149)

43 (connect\* adj3 (care or health care or healthcare or service? or treatment? or therap\* or psychotherap\* or program\*)).tw,kf. (4447)

44 (coordinat\* adj3 (care or health care or healthcare or service? or treatment? or therap\* or psychotherap\* or program\*)).tw,kf. (14002)

45 or/40-44 (461475)

46 39 and 45 (574)

47 (barrier? or hurdle? or obstacle? or challeng\* or incentiv\* or obstruct\* or refusal? or impedim\* or promot\* or facilitat\* or support\* or enabl\* or cause? or reason? or encourag\* or predict\* or hinder\* or willingness).tw,kf. (6647308)

48 ((seek? or seeking) adj3 (help\* or treatment? or care)).tw,kf. (31739)

49 47 or 48 (6661497)

- 50 Community health services/ (30003)
- 51 exp Primary Health Care/ (139690)
- 52 Patient participation/ (22821)
- 53 Patient Care Team/ (60979)
- 54 case management/ (9554)
- 55 critical pathways/ (6019)
- 56 exp "continuity of patient care"/ (218438)
- 57 health education/ (57952)
- 58 health promotion/ (67033)
- 59 health planning/ (21288)
- 60 patient care management/ (3219)
- 61 comprehensive health care/ (6407)
- 62 exp "delivery of health care"/ (978727)
- 63 disease management/ (30690)
- 64 critical pathways/ (6019)
- 65 patient-centered care/ (16429)
- 66 exp "outcome and process assessment (health care)"/ (977104)
- 67 exp program evaluation/ (68936)
- 68 quality assurance, health care/ (54119)
- 69 ((interdisciplin\* or inter-disciplin\* or interprofession\* or inter-profession\* or multidisciplin\* or multi-disciplin\* or multiprofession\* or multi-profession\*) adj3 (team or care or health care or healthcare or service? or treatment? or therap\* or program\*)).tw,kf. (38696)
- 70 (engagement or engage or engaging or empower\* or participat\*).tw,kf. (569356)
- 71 (governan\* or accountab\*).tw,kf. (25773)
- 72 (model adj2 care).tw,kf. (8943)
- 73 (educat\* or screen\* or train\* or transition\* or evaluat\* or coordinat\*).tw,kf. (4766860)
- 74 or/50-73 (6666001)
- 75 39 and 49 and 74 (2505)
- 76 46 or 75 (2867)
- 77 limit 76 to english language (2676)
- 78 77 not (exp animals/ not exp humans/) (2521)

\*\*\*\*\*

Database: **Cochrane Central Register of Controlled Trials** <2014 to Present>

Search Strategy:

-----

- 1 exp Brain Injuries/ (1732)
- 2 exp Brain Injuries, Traumatic/ (1732)
- 3 exp Brain Concussion/ (241)
- 4 Craniocerebral Trauma/ (283)
- 5 tbi\*2.tw,kf. (2040)
- 6 mtbi\*2.tw,kf. (250)
- 7 wrTBI\*2.tw,kf. (0)
- 8 concuss\*.tw,kf. (408)
- 9 postconcuss\*.tw,kf. (102)
- 10 ((brain or head\* or cerebr\* or crani\* or skull\* or intracran\*) adj2 (injur\* or trauma\* or damag\* or wound\* or fracture\* or contusion\*)).tw,kf. (6161)
- 11 ((brain\* or cerebr\* or intracerebr\* or crani\* or intracran\* or head\* or subdural\* or epidural\* or extradural\*) adj (haematoma\* or hematoma\* or hemorrhag\* or haemorrhag\*)).tw,kf. (3526)
- 12 "shaken baby".tw,kf. (9)
- 13 or/1-12 (10514)
- 14 exp Substance-Related Disorders/ (13128)
- 15 gambling/ (298)
- 16 ((drug or substance? or alcohol or opioid? or amphetamine? or cocaine or marijuana or cannabis or phencyclidine or benzodiaz\*) adj2 (misuse or abuse\* or addict\* or depend\*)).tw,kf. (10967)
- 17 gambli???.tw,kf. (623)
- 18 (alcoholi\* or drinker\* or drinking).tw,kf. (11000)
- 19 or/14-18 (26428)
- 20 13 and 19 (185)
- 21 Mental Health/ (1123)
- 22 mental disorders/ or exp anxiety disorders/ or exp "bipolar and related disorders"/ or "disruptive, impulse control, and conduct disorders"/ or exp dissociative disorders/ or exp "feeding and eating disorders"/ or exp mood disorders/ or neurodevelopmental disorders/ or anxiety, separation/ or exp "attention deficit and disruptive behavior disorders"/ or child behavior disorders/ or exp child development disorders, pervasive/ or schizophrenia, childhood/ or exp personality disorders/ or exp "schizophrenia spectrum and other psychotic disorders"/ or exp "trauma and stressor related disorders"/ (26375)
- 23 Depression/ (9417)
- 24 exp Depressive Disorder, Major/ (3972)
- 25 exp Depressive Disorder/ (10136)
- 26 ((mental or psych\*) adj (health\* or illness\* or disease\* or condition\* or disorder?)).tw,kf. (17190)

- 27 anxiety.tw,kf. (28440)
- 28 PTSD.tw,kf. (2944)
- 29 post-traumatic stress disorder?.tw,kf. (994)
- 30 obsessive compulsive.tw,kf. (1950)
- 31 (depression? or depressed or depressiv\* or MDD).tw,kf. (53605)
- 32 Schizophreni\*.tw,kf. (12510)
- 33 bipolar.tw,kf. (5592)
- 34 conduct disorder?.tw,kf. (313)
- 35 attention deficit.tw,kf. (2995)
- 36 hoard\*.tw,kf. (53)
- 37 or/21-36 (103330)
- 38 13 and 37 (847)
- 39 20 or 38 (939)
- 40 exp "Delivery of Health Care, Integrated"/ (314)
- 41 ((vertical or horizontal or integrat\* or coordinat\* or co-ordinat\* or link\*) and (care or health care or healthcare or service? or treatment? or therap\* or psychotherap\* or program\*)).tw,kf. (29535)
- 42 (integrat\* adj3 (care or health care or healthcare or service? or treatment? or therap\* or psychotherap\* or program\*)).tw,kf. (4849)
- 43 (connect\* adj3 (care or health care or healthcare or service? or treatment? or therap\* or psychotherap\* or program\*)).tw,kf. (688)
- 44 (coordinat\* adj3 (care or health care or healthcare or service? or treatment? or therap\* or psychotherap\* or program\*)).tw,kf. (1369)
- 45 or/40-44 (30171)
- 46 39 and 45 (88)
- 47 (barrier? or hurdle? or obstacle? or challeng\* or incentiv\* or obstruct\* or refusal? or impedim\* or promot\* or facilitat\* or support\* or enabl\* or cause? or reason? or encourag\* or predict\* or hinder\* or willingness).tw,kf. (311112)
- 48 ((seek? or seeking) adj3 (help\* or treatment? or care)).tw,kf. (3523)
- 49 47 or 48 (312722)
- 50 Community health services/ (898)
- 51 exp Primary Health Care/ (4481)
- 52 Patient participation/ (1122)
- 53 Patient Care Team/ (1538)
- 54 case management/ (655)
- 55 critical pathways/ (171)
- 56 exp "continuity of patient care"/ (579)

- 57 health education/ (3492)
- 58 health promotion/ (4893)
- 59 health planning/ (34)
- 60 patient care management/ (119)
- 61 comprehensive health care/ (67)
- 62 exp "delivery of health care"/ (38828)
- 63 disease management/ (804)
- 64 critical pathways/ (171)
- 65 patient-centered care/ (450)
- 66 exp "outcome and process assessment (health care)"/ (127732)
- 67 exp program evaluation/ (5433)
- 68 quality assurance, health care/ (612)
- 69 ((interdisciplin\* or inter-disciplin\* or interprofession\* or inter-profession\* or multidisciplin\* or multi-disciplin\* or multiprofession\* or multi-profession\*) adj3 (team or care or health care or healthcare or service? or treatment? or therap\* or program\*)).tw,kf. (3163)
- 70 (engagement or engage or engaging or empower\* or participat\*).tw,kf. (73190)
- 71 (governan\* or accountab\*).tw,kf. (574)
- 72 (model adj2 care).tw,kf. (1606)
- 73 (educat\* or screen\* or train\* or transition\* or evaluat\* or coordinat\*).tw,kf. (428554)
- 74 or/50-73 (543646)
- 75 39 and 49 and 74 (292)
- 76 46 or 75 (336)
- 77 limit 76 to english language (187)

\*\*\*\*\*

Database: **Embase Classic+Embase** <1947 to 2018 August 20>

Search Strategy:

- 
- 1 exp brain injury/ (170129)
  - 2 head injury/ (50510)
  - 3 tbi\*2.tw. (37286)
  - 4 mtbi\*2.tw. (3458)
  - 5 wrTBI\*2.tw. (16)
  - 6 concuss\*.tw. (10071)
  - 7 postconcuss\*.tw. (1412)

- 8 ((brain or head\* or cerebr\* or crani\* or skull\* or intracran\*) adj2 (injur\* or trauma\* or damag\* or wound\* or fracture\* or contusion\*)).tw. (173261)
- 9 ((brain\* or cerebr\* or intracerebr\* or crani\* or intracran\* or head\* or subdural\* or epidural\* or extradural\*) adj (haematoma\* or hematoma\* or hemorrhag\* or haemorrhag\*)).tw. (64309)
- 10 "shaken baby".tw. (743)
- 11 or/1-10 (329144)
- 12 addiction/ (51840)
- 13 exp drug dependence/ (227621)
- 14 pathological gambling/ (5577)
- 15 ((drug or substance? or alcohol or opioid? or amphetamine? or cocaine or marijuana or cannabis or phencyclidine or benzodiaz\*) adj2 (misuse or abuse\* or addict\* or depend\*)).tw. (146297)
- 16 gambl???.tw. (10917)
- 17 (alcoholi\* or drinker\* or drinking).tw. (248964)
- 18 or/12-17 (514147)
- 19 11 and 18 (6730)
- 20 exp mental health/ (132537)
- 21 mental disease/ (222219)
- 22 exp anxiety disorder/ (211380)
- 23 exp bipolar disorder/ (57278)
- 24 behavior disorder/ or attention deficit disorder/ or disruptive behavior/ or drug seeking behavior/ or impulse control disorder/ (107231)
- 25 exp dissociative disorder/ (8226)
- 26 exp eating disorder/ (47110)
- 27 exp mood disorder/ (461687)
- 28 exp autism/ (57648)
- 29 exp schizophrenia/ (181763)
- 30 exp personality disorder/ (59926)
- 31 exp psychosis/ (284664)
- 32 ((mental or psych\*) adj (health\* or illness\* or disease\* or condition\* or disorder?)).tw. (304770)
- 33 PTSD.tw. (25839)
- 34 post-traumatic stress disorder?.tw. (12129)
- 35 obsessive compulsive.tw. (20726)
- 36 (depression? or depressed or depressiv\* or MDD).tw. (545145)
- 37 Schizophreni\*.tw. (158068)
- 38 bipolar.tw. (81682)

- 39 conduct disorder?.tw. (5392)
- 40 attention deficit.tw. (31286)
- 41 hoard\*.tw. (1814)
- 42 or/20-41 (1531303)
- 43 11 and 42 (29736)
- 44 19 or 43 (34158)
- 45 integrated health care system/ (9873)
- 46 ((vertical or horizontal or integrat\* or coordinat\* or co-ordinat\* or link\*) and (care or health care or healthcare or service? or treatment? or therap\* or psychotherap\* or program\*)).tw. (624215)
- 47 (integrat\* adj3 (care or health care or healthcare or service? or treatment? or therap\* or psychotherap\* or program\*)).tw. (44675)
- 48 (connect\* adj3 (care or health care or healthcare or service? or treatment? or therap\* or psychotherap\* or program\*)).tw. (6653)
- 49 (coordinat\* adj3 (care or health care or healthcare or service? or treatment? or therap\* or psychotherap\* or program\*)).tw. (19801)
- 50 or/45-49 (634621)
- 51 44 and 50 (1382)
- 52 (barrier? or hurdle? or obstacle? or challeng\* or incentiv\* or obstruct\* or refusal? or impedim\* or promot\* or facilitat\* or support\* or enabl\* or cause? or reason? or encourag\* or predict\* or hinder\* or willingness).tw. (8662026)
- 53 ((seek? or seeking) adj3 (help\* or treatment? or care)).tw. (40702)
- 54 52 or 53 (8679961)
- 55 exp community care/ (116494)
- 56 exp primary health care/ (147878)
- 57 patient participation/ (23829)
- 58 exp patient care/ (719197)
- 59 clinical pathway/ (7778)
- 60 exp health education/ (297823)
- 61 health care planning/ (94317)
- 62 exp health care delivery/ (2870808)
- 63 disease management/ (19050)
- 64 outcome assessment/ (432109)
- 65 exp health care quality/ (2772612)
- 66 exp program evaluation/ (17544)



- 67 ((interdisciplin\* or inter-disciplin\* or interprofession\* or inter-profession\* or multidisciplin\* or multi-disciplin\* or multiprofession\* or multi-profession\*) adj3 (team or care or health care or healthcare or service? or treatment? or therap\* or program\*)).tw. (64305)
- 68 (engagement or engage or engaging or empower\* or participat\*).tw. (743424)
- 69 (governan\* or accountab\*).tw. (31041)
- 70 (model adj2 care).tw. (12583)
- 71 (educat\* or screen\* or train\* or transition\* or evaluat\* or coordinat\*).tw. (6328902)
- 72 or/55-71 (10373343)
- 73 44 and 54 and 72 (7037)
- 74 51 or 73 (7854)
- 75 limit 74 to english language (7426)
- 76 75 not ((exp animals/ or exp animal experimentation/ or nonhuman/) not exp human/) (6887)
- 77 limit 76 to conference abstracts (2365)
- 78 76 not 77 (4522)
- 79 78 not medline.cr. (4055)

\*\*\*\*\*

Database: **PsycINFO** <1806 to August Week 1 2018>

Search Strategy:

-----

- 1 exp traumatic brain injury/ (17391)
- 2 exp head injuries/ (5923)
- 3 tbi\*2.tw. (9703)
- 4 mtbi\*2.tw. (1562)
- 5 wrTBI\*2.tw. (8)
- 6 concuss\*.tw. (2850)
- 7 postconcuss\*.tw. (796)
- 8 ((brain or head\* or cerebr\* or crani\* or skull\* or intracran\*) adj2 (injur\* or trauma\* or damag\* or wound\* or fracture\* or contusion\*)).tw. (45163)
- 9 ((brain\* or cerebr\* or intracerebr\* or crani\* or intracran\* or head\* or subdural\* or epidural\* or extradural\*) adj (haematoma\* or hematoma\* or hemorrhag\* or haemorrhag\*)).tw. (3211)
- 10 "shaken baby".tw. (185)
- 11 or/1-10 (49487)
- 12 exp drug abuse/ (105296)
- 13 "substance use disorder"/ (5723)

- 14 addiction/ (9744)
- 15 exp gambling/ (7117)
- 16 ((drug or substance? or alcohol or opioid? or amphetamine? or cocaine or marijuana or cannabis or phencyclidine or benzodiaz\*) adj2 (misuse or abuse\* or addict\* or depend\*)).tw. (95808)
- 17 gambler?.tw. (11158)
- 18 (alcohol\* or drinker\* or drinking).tw. (71401)
- 19 or/12-18 (189802)
- 20 11 and 19 (1834)
- 21 mental health/ (57737)
- 22 mental disorders/ (78899)
- 23 exp anxiety disorders/ (77257)
- 24 exp affective disorders/ (151634)
- 25 exp impulse control disorders/ (1034)
- 26 conduct disorder/ (4163)
- 27 behavior disorders/ (9073)
- 28 exp dissociative disorders/ (5069)
- 29 exp eating disorders/ (28488)
- 30 neurodevelopmental disorders/ (1969)
- 31 autism spectrum disorders/ (38498)
- 32 exp separation anxiety/ (1529)
- 33 exp attention deficit disorder/ (24934)
- 34 exp psychosis/ (109127)
- 35 exp personality disorders/ (33271)
- 36 exp posttraumatic stress disorder/ (29576)
- 37 ((mental or psych\*) adj (health\* or illness\* or disease\* or condition\* or disorder?)).tw. (306679)
- 38 anxiety.tw. (180502)
- 39 PTSD.tw. (29697)
- 40 post-traumatic stress disorder?.tw. (9443)
- 41 obsessive compulsive.tw. (19372)
- 42 (depression? or depressed or depressiv\* or MDD).tw. (278508)
- 43 Schizophrenia\*.tw. (118127)
- 44 bipolar.tw. (37311)
- 45 conduct disorder?.tw. (7217)
- 46 attention deficit.tw. (29043)
- 47 hoard\*.tw. (1855)

48 or/21-47 (887448)  
49 11 and 48 (9062)  
50 20 or 49 (10045)  
51 integrated services/ (3216)  
52 ((vertical or horizontal or integrat\* or coordinat\* or co-ordinat\* or link\*) and (care or health care or healthcare or service? or treatment? or therap\* or psychotherap\* or program\*)).tw. (152611)  
53 (integrat\* adj3 (care or health care or healthcare or service? or treatment? or therap\* or psychotherap\* or program\*)).tw. (20889)  
54 (connect\* adj3 (care or health care or healthcare or service? or treatment? or therap\* or psychotherap\* or program\*)).tw. (2818)  
55 (coordinat\* adj3 (care or health care or healthcare or service? or treatment? or therap\* or psychotherap\* or program\*)).tw. (5590)  
56 or/51-55 (155650)  
57 50 and 56 (576)  
58 Treatment Barriers/ (4168)  
59 (barrier? or hurdle? or obstacle? or challeng\* or incentiv\* or obstruct\* or refusal? or impedim\* or promot\* or facilitat\* or support\* or enabl\* or cause? or reason? or encourag\* or predict\* or hinder\* or willingness).tw. (1644346)  
60 ((seek? or seeking) adj3 (help\* or treatment? or care)).tw. (24738)  
61 or/58-60 (1655245)  
62 exp community services/ (31008)  
63 primary health care/ (16770)  
64 health care services/ (40379)  
65 "continuum of care"/ (1628)  
66 health care delivery/ (19878)  
67 interdisciplinary treatment approach/ (6871)  
68 client participation/ (1850)  
69 exp case management/ (3343)  
70 exp managed care/ (4298)  
71 client centered therapy/ (3105)  
72 exp "quality of services"/ (17955)  
73 exp health education/ or client education/ (20686)  
74 health promotion/ (22605)  
75 exp treatment planning/ (6202)  
76 disease management/ (6121)  
77 exp program evaluation/ (19435)

- 78 ((interdisciplin\* or inter-disciplin\* or interprofession\* or inter-profession\* or multidisciplin\* or multi-disciplin\* or multiprofession\* or multi-profession\*) adj3 (team or care or health care or healthcare or service? or treatment? or therap\* or program\*)).tw. (11242)
- 79 (engagement or engage or engaging or empower\* or participat\*).tw. (374143)
- 80 (governan\* or accountab\*).tw. (25304)
- 81 (model adj2 care).tw. (3435)
- 82 (educat\* or screen\* or train\* or transition\* or evaluat\* or coordinat\*).tw. (1245279)
- 83 or/62-82 (1562608)
- 84 50 and 61 and 83 (1650)
- 85 57 or 84 (2011)
- 86 limit 85 to english language (1934)
- 87 limit 86 to animal (115)
- 88 limit 87 to human (33)
- 89 86 not (87 not 88) (1852)
- 90 limit 89 to ("0200 book" or "0240 authored book" or "0280 edited book" or "0300 encyclopedia") (458)
- 91 89 not 90 (1394)

\*\*\*\*\*

Database: CINAHL (searched 2018.08.21)

| #   | Query                                                                                                                                                                                                         | Limiters/Expanders                                           | Results   |
|-----|---------------------------------------------------------------------------------------------------------------------------------------------------------------------------------------------------------------|--------------------------------------------------------------|-----------|
| S81 | S80                                                                                                                                                                                                           | Limiters - English Language<br>Search modes - Boolean/Phrase | 1,242     |
| S80 | S52 OR S79                                                                                                                                                                                                    | Search modes - Boolean/Phrase                                | 1,250     |
| S79 | S45 AND S55 AND S78                                                                                                                                                                                           | Search modes - Boolean/Phrase                                | 1,123     |
| S78 | S56 OR S57 OR S58 OR S59 OR S60 OR S61 OR S62 OR S63 OR S64 OR S65 OR S66 OR S67 OR S68 OR S69 OR S70 OR S71 OR S72 OR S73 OR S74 OR S75 OR S76 OR S77                                                        | Search modes - Boolean/Phrase                                | 1,628,534 |
| S77 | (educat* or screen* or train* or transition* or evaluat* or coordinat*)                                                                                                                                       | Search modes - Boolean/Phrase                                | 1,128,349 |
| S76 | (model n2 care)                                                                                                                                                                                               | Search modes - Boolean/Phrase                                | 11,356    |
| S75 | (governan* or accountab*)                                                                                                                                                                                     | Search modes - Boolean/Phrase                                | 24,583    |
| S74 | (engagement or engage or engaging or empower* or participat*)                                                                                                                                                 | Search modes - Boolean/Phrase                                | 175,276   |
| S73 | ((interdisciplin* or inter-disciplin* or interprofession* or inter-profession* or multidisciplin* or multi-disciplin* or multiprofession* or multi-profession*) n3 (team or care or health care or healthcare | Search modes - Boolean/Phrase                                | 39,697    |

|     |                                                                                                                                                                                                                          |                               |         |
|-----|--------------------------------------------------------------------------------------------------------------------------------------------------------------------------------------------------------------------------|-------------------------------|---------|
|     | or service* or treatment* or therap* or program*))                                                                                                                                                                       |                               |         |
| S72 | (MH "Quality of Health Care+")                                                                                                                                                                                           | Search modes - Boolean/Phrase | 413,487 |
| S71 | (MH "Program Development+")                                                                                                                                                                                              | Search modes - Boolean/Phrase | 51,590  |
| S70 | (MH "Outcome Assessment")                                                                                                                                                                                                | Search modes - Boolean/Phrase | 23,937  |
| S69 | (MH "Process Assessment (Health Care)+")                                                                                                                                                                                 | Search modes - Boolean/Phrase | 5,750   |
| S68 | (MH "Patient Centered Care")                                                                                                                                                                                             | Search modes - Boolean/Phrase | 18,429  |
| S67 | (MH "Disease Management+")                                                                                                                                                                                               | Search modes - Boolean/Phrase | 11,760  |
| S66 | (MH "Health Care Delivery+")                                                                                                                                                                                             | Search modes - Boolean/Phrase | 210,880 |
| S65 | (MH "Patient Care Plans+")                                                                                                                                                                                               | Search modes - Boolean/Phrase | 6,852   |
| S64 | (MH "Health Promotion")                                                                                                                                                                                                  | Search modes - Boolean/Phrase | 39,646  |
| S63 | (MH "Health Education+")                                                                                                                                                                                                 | Search modes - Boolean/Phrase | 88,614  |
| S62 | (MH "Continuity of Patient Care+")                                                                                                                                                                                       | Search modes - Boolean/Phrase | 12,938  |
| S61 | (MH "Critical Path")                                                                                                                                                                                                     | Search modes - Boolean/Phrase | 3,710   |
| S60 | (MH "Case Management")                                                                                                                                                                                                   | Search modes - Boolean/Phrase | 13,403  |
| S59 | (MH "Multidisciplinary Care Team")                                                                                                                                                                                       | Search modes - Boolean/Phrase | 28,529  |
| S58 | (MH "Consumer Participation")                                                                                                                                                                                            | Search modes - Boolean/Phrase | 12,214  |
| S57 | (MH "Primary Health Care")                                                                                                                                                                                               | Search modes - Boolean/Phrase | 38,581  |
| S56 | (MH "Community Health Services")                                                                                                                                                                                         | Search modes - Boolean/Phrase | 13,940  |
| S55 | S53 OR S54                                                                                                                                                                                                               | Search modes - Boolean/Phrase | 903,092 |
| S54 | ((seek or seeks or seeking) n3 (help* or treatment* or care))                                                                                                                                                            | Search modes - Boolean/Phrase | 13,303  |
| S53 | (barrier* or hurdle* or obstacle* or challeng* or incentiv* or obstruct* or refusal* or impedim* or promot* or facilitat* or support* or enabl* or cause* or reason* or encourag* or predict* or hinder* or willingness) | Search modes - Boolean/Phrase | 897,161 |
| S52 | S45 AND S51                                                                                                                                                                                                              | Search modes - Boolean/Phrase | 240     |
| S51 | S46 OR S47 OR S48 OR S49 OR S50                                                                                                                                                                                          | Search modes - Boolean/Phrase | 112,403 |
| S50 | (coordinat* n3 (care or health care or healthcare or service* or treatment* or therap* or psychotherap* or program*))                                                                                                    | Search modes - Boolean/Phrase | 6,957   |
| S49 | (connect* n3 (care or health care or healthcare or service* or treatment* or therap* or psychotherap* or program*))                                                                                                      | Search modes - Boolean/Phrase | 2,263   |
| S48 | (integrat* n3 (care or health care or healthcare or service* or treatment* or therap* or psychotherap* or program*))                                                                                                     | Search modes - Boolean/Phrase | 19,214  |
| S47 | ((vertical or horizontal or integrat* or coordinat* or co-ordinat* or link*) and (care or health care or healthcare or service* or treatment* or therap* or psychotherap* or program*))                                  | Search modes - Boolean/Phrase | 110,503 |
| S46 | (MH "Health Care Delivery, Integrated")                                                                                                                                                                                  | Search modes - Boolean/Phrase | 6,478   |
| S45 | S19 OR S44                                                                                                                                                                                                               | Search modes - Boolean/Phrase | 4,356   |
| S44 | S12 AND S43                                                                                                                                                                                                              | Search modes - Boolean/Phrase | 3,562   |
| S43 | S20 OR S21 OR S22 OR S23 OR S24 OR S25 OR S26 OR S27 OR S28 OR S29 OR S30 OR S31 OR S32 OR S33 OR S34 OR S35 OR S36 OR S37 OR S38 OR S39 OR S40 OR S41 OR S42                                                            | Search modes - Boolean/Phrase | 295,552 |
| S42 | hoard*                                                                                                                                                                                                                   | Search modes - Boolean/Phrase | 279     |

|     |                                                                                                                                                                                                                                                                                     |                               |         |
|-----|-------------------------------------------------------------------------------------------------------------------------------------------------------------------------------------------------------------------------------------------------------------------------------------|-------------------------------|---------|
| S41 | attention deficit                                                                                                                                                                                                                                                                   | Search modes - Boolean/Phrase | 8,798   |
| S40 | conduct disorder*                                                                                                                                                                                                                                                                   | Search modes - Boolean/Phrase | 762     |
| S39 | bipolar                                                                                                                                                                                                                                                                             | Search modes - Boolean/Phrase | 7,852   |
| S38 | Schizophreni*                                                                                                                                                                                                                                                                       | Search modes - Boolean/Phrase | 13,979  |
| S37 | ((depression* or depressed or depressiv* or MDD)                                                                                                                                                                                                                                    | Search modes - Boolean/Phrase | 92,716  |
| S36 | obsessive compulsive                                                                                                                                                                                                                                                                | Search modes - Boolean/Phrase | 2,839   |
| S35 | post-traumatic stress disorder*                                                                                                                                                                                                                                                     | Search modes - Boolean/Phrase | 2,651   |
| S34 | PTSD                                                                                                                                                                                                                                                                                | Search modes - Boolean/Phrase | 4,813   |
| S33 | anxiety                                                                                                                                                                                                                                                                             | Search modes - Boolean/Phrase | 48,239  |
| S32 | ((mental or psych*) n1 (health* or illness* or disease* or condition* or disorder*))                                                                                                                                                                                                | Search modes - Boolean/Phrase | 150,733 |
| S31 | (MH "Stress Disorders, Post-Traumatic")                                                                                                                                                                                                                                             | Search modes - Boolean/Phrase | 11,557  |
| S30 | (MH "Attention Deficit Hyperactivity Disorder") OR (MH "Mental Disorders Diagnosed in Childhood") OR (MH "Child Behavior Disorders+") OR (MH "Child Development Disorders+") OR (MH "Child Development Disorders, Pervasive+") OR (MH "Feeding and Eating Disorders of Childhood+") | Search modes - Boolean/Phrase | 28,519  |
| S29 | (MH "Separation Anxiety")                                                                                                                                                                                                                                                           | Search modes - Boolean/Phrase | 382     |
| S28 | (MH "Depression+")                                                                                                                                                                                                                                                                  | Search modes - Boolean/Phrase | 59,957  |
| S27 | (MH "Affective Disorders+")                                                                                                                                                                                                                                                         | Search modes - Boolean/Phrase | 63,151  |
| S26 | (MH "Eating Disorders+")                                                                                                                                                                                                                                                            | Search modes - Boolean/Phrase | 11,050  |
| S25 | (MH "Dissociative Disorders+")                                                                                                                                                                                                                                                      | Search modes - Boolean/Phrase | 665     |
| S24 | (MH "Personality Disorders+")                                                                                                                                                                                                                                                       | Search modes - Boolean/Phrase | 6,356   |
| S23 | (MH "Affective Disorders, Psychotic+") OR (MH "Psychotic Disorders") OR (MH "Schizoaffective Disorder") OR (MH "Schizophrenia+")                                                                                                                                                    | Search modes - Boolean/Phrase | 19,775  |
| S22 | (MH "Anxiety Disorders+")                                                                                                                                                                                                                                                           | Search modes - Boolean/Phrase | 21,620  |
| S21 | (MH "Mental Disorders")                                                                                                                                                                                                                                                             | Search modes - Boolean/Phrase | 33,506  |
| S20 | (MH "Mental Health")                                                                                                                                                                                                                                                                | Search modes - Boolean/Phrase | 18,412  |
| S19 | S12 AND S18                                                                                                                                                                                                                                                                         | Search modes - Boolean/Phrase | 1,098   |
| S18 | S13 OR S14 OR S15 OR S16 OR S17                                                                                                                                                                                                                                                     | Search modes - Boolean/Phrase | 122,473 |
| S17 | alcoholi* or drinker* or drinking                                                                                                                                                                                                                                                   | Search modes - Boolean/Phrase | 37,825  |
| S16 | (gamble* or gambling*)                                                                                                                                                                                                                                                              | Search modes - Boolean/Phrase | 1,914   |
| S15 | ((drug or substance* or alcohol or opioid* or amphetamine* or cocaine or marijuana or cannabis or phencyclidine or benzodiaz*) n2 (misuse or abuse* or addict* or depend*))                                                                                                         | Search modes - Boolean/Phrase | 56,272  |
| S14 | (MH "Gambling")                                                                                                                                                                                                                                                                     | Search modes - Boolean/Phrase | 1,265   |
| S13 | (MH "Substance Use Disorders+")                                                                                                                                                                                                                                                     | Search modes - Boolean/Phrase | 93,525  |
| S12 | S1 OR S2 OR S3 OR S4 OR S5 OR S6 OR S7 OR S8 OR S9 OR S10 OR S11                                                                                                                                                                                                                    | Search modes - Boolean/Phrase | 41,008  |
| S11 | shaken baby                                                                                                                                                                                                                                                                         | Search modes - Boolean/Phrase | 392     |
| S10 | ((brain* or cerebr* or intracerebr* or crani* or intracran* or head* or subdural* or epidural* or extradural*) n1 (haematoma* or hematoma* or hemorrhag* or haemorrhag*))                                                                                                           | Search modes - Boolean/Phrase | 9,061   |

|    |                                                                                                                                       |                               |        |
|----|---------------------------------------------------------------------------------------------------------------------------------------|-------------------------------|--------|
| S9 | ((brain or head* or cerebr* or crani* or skull* or intracran*) n2 (injur* or trauma* or damag* or wound* or fracture* or contusion*)) | Search modes - Boolean/Phrase | 30,635 |
| S8 | postconcuss*                                                                                                                          | Search modes - Boolean/Phrase | 741    |
| S7 | concuss*                                                                                                                              | Search modes - Boolean/Phrase | 3,360  |
| S6 | wrTBI*                                                                                                                                | Search modes - Boolean/Phrase | 7      |
| S5 | mTBI*                                                                                                                                 | Search modes - Boolean/Phrase | 614    |
| S4 | TBI*                                                                                                                                  | Search modes - Boolean/Phrase | 5,222  |
| S3 | (MH "Head Injuries")                                                                                                                  | Search modes - Boolean/Phrase | 4,698  |
| S2 | (MH "Brain Concussion+")                                                                                                              | Search modes - Boolean/Phrase | 2,888  |
| S1 | (MH "Brain Injuries+")                                                                                                                | Search modes - Boolean/Phrase | 18,914 |

#### Database: **Sociological Abstracts**

(noft(tbi\* OR mtbi\* OR concuss\* OR postconcuss\* OR "shaken baby") OR noft(((brain OR head\* OR cerebr\* OR crani\* OR skull\* OR intracran\*) NEAR/2 (injur\* OR trauma\* OR damag\* OR wound\* OR fracture\* OR contusion\*)))) AND (noft(((drug OR substance? OR alcohol OR opioid? OR amphetamine? OR cocaine OR marijuana OR cannabis OR phencyclidine OR benzodiaz\*) NEAR/2 (misuse OR abuse\* OR addict\* OR depend\*))) OR noft(gambl???) OR noft((alcoholi\* OR drinker\* OR drinking)) OR noft(((mental OR psych\*) NEAR/1 (health\* OR illness\* OR disease\* OR condition\* OR disorder?))) OR noft(anxiety OR PTSD OR "post-traumatic stress" OR "obsessive compulsive" OR depression? OR depressed OR depressiv\* OR MDD OR Schizophreni\* OR "attention deficit" OR hoard\*) OR noft("conduct disorder" OR "conduct disorders"))

#### Limits applied

- Language: English
- Exclude: Books; Magazines

#### Database: **ProQuest Dissertations & Theses Global**

((noft(tbi\* OR mtbi\* OR concuss\* OR postconcuss\* OR "shaken baby") OR noft(((brain OR head\* OR cerebr\* OR crani\* OR skull\* OR intracran\*) NEAR/2 (injur\* OR trauma\* OR damag\* OR wound\* OR fracture\* OR contusion\*)))) AND (noft(((drug OR substance? OR alcohol OR opioid? OR amphetamine? OR cocaine OR marijuana OR cannabis OR phencyclidine OR benzodiaz\*) NEAR/2 (misuse OR abuse\* OR addict\* OR depend\*))) OR noft(gambl???) OR noft((alcoholi\* OR drinker\* OR drinking)) OR noft(((mental OR psych\*) NEAR/1 (health\* OR illness\* OR disease\* OR condition\* OR disorder?))) OR noft(anxiety OR PTSD OR "post-traumatic stress" OR "obsessive compulsive" OR depression? OR depressed OR depressiv\* OR MDD OR Schizophreni\* OR "attention deficit" OR hoard\*) OR noft("conduct disorder" OR "conduct disorders")) AND ((noft(barrier\* OR hurdle\* OR obstacle\* OR challeng\* OR incentiv\* OR obstruct\* OR refusal\* OR impedim\* OR promot\* OR facilitat\* OR support\* OR enabl\* OR cause\* OR reason\* OR encourag\* OR predict\* OR hinder\* OR willingness) OR noft(seek\* NEAR/3 help\*) OR noft(seek\* NEAR/3 treatment\*) OR noft(seek\* NEAR/3 care)) AND (noft((interdisciplin\* OR inter-disciplin\* OR interprofession\* OR inter-profession\* OR multidisciplin\* OR multi-disciplin\* OR multiprofession\* OR multi-profession\*)) OR noft(engagement OR engage OR engaging OR

empower\* OR participat\*) OR noft(governan\* OR accountab\*) OR noft(model NEAR/2 care) OR noft(educat\* OR screen\* OR train\* OR transition\* OR evaluat\* OR coordinat\*)) OR (((noft(tbi\* OR mtbi\* OR concuss\* OR postconcuss\* OR "shaken baby") OR noft(((brain OR head\* OR cerebr\* OR crani\* OR skull\* OR intracran\*) NEAR/2 (injur\* OR trauma\* OR damag\* OR wound\* OR fracture\* OR contusion\*)))) AND (noft(((drug OR substance? OR alcohol OR opioid? OR amphetamine? OR cocaine OR marijuana OR cannabis OR phencyclidine OR benzodiaz\*) NEAR/2 (misuse OR abuse\* OR addict\* OR depend\*)) OR noft(gambl???) OR noft((alcoholi\* OR drinker\* OR drinking)) OR noft(((mental OR psych\*) NEAR/1 (health\* OR illness\* OR disease\* OR condition\* OR disorder?))) OR noft(anxiety OR PTSD OR "post-traumatic stress" OR "obsessive compulsive" OR depression? OR depressed OR depressiv\* OR MDD OR Schizophreni\* OR "attention deficit" OR hoard\*) OR noft("conduct disorder" OR "conduct disorders")))) AND ((noft((vertical OR horizontal OR integrat\* OR coordinat\* OR co-ordinat\* OR link\*)) AND noft((care OR health care OR healthcare OR service\* OR treatment\* OR therap\* OR psychotherap\* OR program\*)) OR (noft((integrat\*) NEAR/3 (care)) OR noft((integrat\*) NEAR/3 ("health care")) OR noft((integrat\*) NEAR/3 (healthcare)) OR noft((integrat\*) NEAR/3 (healthcare)) OR noft((integrat\*) NEAR/3 (service\*)) OR noft((integrat\*) NEAR/3 (treatment\*)) OR noft((integrat\*) NEAR/3 (therap\*)) OR noft((integrat\*) NEAR/3 (psychotherap\*)) OR noft((integrat\*) NEAR/3 (program\*)) OR noft((coordinat\*) NEAR/3 (care)) OR noft((coordinat\*) NEAR/3 ("health care")) OR noft((coordinat\*) NEAR/3 (healthcare)) OR noft((coordinat\*) NEAR/3 (healthcare)) OR noft((coordinat\*) NEAR/3 (service\*)) OR noft((coordinat\*) NEAR/3 (treatment\*)) OR noft((coordinat\*) NEAR/3 (therap\*)) OR noft((coordinat\*) NEAR/3 (psychotherap\*)) OR noft((coordinat\*) NEAR/3 (program\*)) OR noft((connect\*) NEAR/3 (care)) OR noft((connect\*) NEAR/3 ("health care")) OR noft((connect\*) NEAR/3 (healthcare)) OR noft((connect\*) NEAR/3 (healthcare)) OR noft((connect\*) NEAR/3 (service\*)) OR noft((connect\*) NEAR/3 (treatment\*)) OR noft((connect\*) NEAR/3 (therap\*)) OR noft((connect\*) NEAR/3 (psychotherap\*)) OR noft((connect\*) NEAR/3 (program\*))))Limits applied

Limits applied:

- Language: English
